# Supplementary material for: Development of a high intensity parallel photoreactor for high throughput screening
Source: Royal Society of Chemistry journal article supplement (doi:10.1039/d1re00317h), 2021-11-17
Supplement: d1re00317h1.pdf [file d1re00317h1.pdf]

| Sample Name                | Light Source | Product LCAP | Unreacted S1 LCAP | Protodehalogenation Side Product LCAP |
|----------------------------|--------------|--------------|-------------------|---------------------------------------|
| Experiment 3-1-Plate1-0001 | Kessil Lamp  | 1.58         | 85.19             | 2.62                                  |
| Experiment 3-1-Plate1-0002 | Kessil Lamp  | 1.76         | 85.09             | 2.67                                  |
| Experiment 3-1-Plate1-0003 | Kessil Lamp  | 1.61         | 85.29             | 2.58                                  |
| Experiment 3-1-Plate1-0004 | Kessil Lamp  | 1.58         | 85.22             | 2.61                                  |
| Experiment 3-1-Plate1-0005 | Kessil Lamp  | 2.23         | 83.80             | 3.16                                  |
| Experiment 3-1-Plate1-0006 | Kessil Lamp  | 2.37         | 84.22             | 3.17                                  |
| Experiment 3-1-Plate1-0007 | Kessil Lamp  | 2.49         | 82.02             | 3.61                                  |
| Experiment 3-1-Plate1-0008 | Kessil Lamp  | 2.25         | 82.10             | 3.55                                  |
| Experiment 3-1-Plate1-0009 | Kessil Lamp  | 2.60         | 81.71             | 3.80                                  |
| Experiment 3-1-Plate1-0010 | Kessil Lamp  | 2.17         | 82.75             | 3.69                                  |
| Experiment 3-1-Plate1-0011 | Kessil Lamp  | 3.04         | 81.24             | 4.02                                  |
| Experiment 3-1-Plate1-0012 | Kessil Lamp  | 2.07         | 83.62             | 3.25                                  |
| Experiment 3-1-Plate1-0013 | Kessil Lamp  | 1.54         | 85.07             | 2.64                                  |
| Experiment 3-1-Plate1-0014 | Kessil Lamp  | 1.58         | 86.17             | 2.55                                  |
| Experiment 3-1-Plate1-0015 | Kessil Lamp  | 1.46         | 85.51             | 2.52                                  |
| Experiment 3-1-Plate1-0016 | Kessil Lamp  | 2.23         | 83.60             | 3.12                                  |
| Experiment 3-1-Plate1-0017 | Kessil Lamp  | 1.77         | 84.59             | 2.80                                  |
| Experiment 3-1-Plate1-0018 | Kessil Lamp  | 4.55         | 78.62             | 4.75                                  |
| Experiment 3-1-Plate1-0019 | Kessil Lamp  | 1.76         | 84.39             | 2.84                                  |
| Experiment 3-1-Plate1-0020 | Kessil Lamp  | 1.82         | 83.63             | 3.19                                  |
| Experiment 3-1-Plate1-0021 | Kessil Lamp  | 2.32         | 83.22             | 3.11                                  |
| Experiment 3-1-Plate1-0022 | Kessil Lamp  | 2.58         | 81.48             | 3.88                                  |
| Experiment 3-1-Plate1-0023 | Kessil Lamp  | 2.07         | 82.96             | 3.43                                  |
| Experiment 3-1-Plate1-0024 | Kessil Lamp  | 2.48         | 82.47             | 3.45                                  |
| Experiment 3-1-Plate1-0025 | Kessil Lamp  | 1.46         | 86.13             | 2.48                                  |
| Experiment 3-1-Plate1-0026 | Kessil Lamp  | 1.57         | 85.68             | 2.55                                  |
| Experiment 3-1-Plate1-0027 | Kessil Lamp  | 1.64         | 85.79             | 2.44                                  |
| Experiment 3-1-Plate1-0028 | Kessil Lamp  | 2.23         | 84.05             | 2.99                                  |
| Experiment 3-1-Plate1-0029 | Kessil Lamp  | 1.70         | 85.03             | 2.59                                  |
| Experiment 3-1-Plate1-0030 | Kessil Lamp  | 1.87         | 84.86             | 2.78                                  |
| Experiment 3-1-Plate1-0031 | Kessil Lamp  | 3.23         | 81.38             | 3.59                                  |
| Experiment 3-1-Plate1-0032 | Kessil Lamp  | 3.59         | 80.40             | 4.05                                  |
| Experiment 3-1-Plate1-0033 | Kessil Lamp  | 2.36         | 83.10             | 3.07                                  |
| Experiment 3-1-Plate1-0034 | Kessil Lamp  | 2.05         | 83.28             | 3.08                                  |
| Experiment 3-1-Plate1-0035 | Kessil Lamp  | 1.98         | 84.02             | 2.84                                  |
| Experiment 3-1-Plate1-0036 | Kessil Lamp  | 2.13         | 83.28             | 3.08                                  |
| Experiment 3-1-Plate1-0037 | Kessil Lamp  | 1.48         | 86.02             | 2.50                                  |
| Experiment 3-1-Plate1-0038 | Kessil Lamp  | 2.00         | 84.43             | 2.79                                  |
| Experiment 3-1-Plate1-0039 | Kessil Lamp  | 1.77         | 83.95             | 2.85                                  |
| Experiment 3-1-Plate1-0040 | Kessil Lamp  | 2.30         | 84.59             | 3.18                                  |
| Experiment 3-1-Plate1-0041 | Kessil Lamp  | 1.93         | 84.57             | 2.76                                  |
| Experiment 3-1-Plate1-0042 | Kessil Lamp  | 3.11         | 81.85             | 3.69                                  |
| Experiment 3-1-Plate1-0043 | Kessil Lamp  | 1.86         | 84.52             | 2.61                                  |
| Experiment 3-1-Plate1-0044 | Kessil Lamp  | 1.87         | 84.38             | 2.67                                  |
| Experiment 3-1-Plate1-0045 | Kessil Lamp  | 1.67         | 85.56             | 2.36                                  |
| Experiment 3-1-Plate1-0046 | Kessil Lamp  | 2.21         | 83.72             | 3.05                                  |
| Experiment 3-1-Plate1-0047 | Kessil Lamp  | 1.97         | 84.06             | 3.01                                  |
| Experiment 3-1-Plate1-0048 | Kessil Lamp  | 2.51         | 82.67             | 3.51                                  |
| Experiment 3-1-Plate1-0049 | Kessil Lamp  | 1.58         | 85.20             | 2.66                                  |
| Experiment 3-1-Plate1-0050 | Kessil Lamp  | 1.66         | 84.41             | 2.74                                  |
| Experiment 3-1-Plate1-0051 | Kessil Lamp  | 1.70         | 85.93             | 2.41                                  |
| Experiment 3-1-Plate1-0052 | Kessil Lamp  | 2.00         | 84.39             | 2.96                                  |
| Experiment 3-1-Plate1-0053 | Kessil Lamp  | 2.02         | 84.31             | 2.84                                  |
| Experiment 3-1-Plate1-0054 | Kessil Lamp  | 1.61         | 85.82             | 2.55                                  |
| Experiment 3-1-Plate1-0055 | Kessil Lamp  | 1.78         | 84.79             | 2.65                                  |
| Experiment 3-1-Plate1-0056 | Kessil Lamp  | 1.64         | 84.39             | 2.56                                  |
| Experiment 3-1-Plate1-0057 | Kessil Lamp  | 2.23         | 83.08             | 2.91                                  |
| Experiment 3-1-Plate1-0058 | Kessil Lamp  | 1.51         | 85.65             | 2.45                                  |
| Experiment 3-1-Plate1-0059 | Kessil Lamp  | 1.99         | 84.49             | 2.79                                  |
| Experiment 3-1-Plate1-0060 | Kessil Lamp  | 1.72         | 84.51             | 2.75                                  |
| Experiment 3-1-Plate1-0061 | Kessil Lamp  | 1.74         | 85.34             | 3.00                                  |
| Experiment 3-1-Plate1-0062 | Kessil Lamp  | 3.31         | 81.29             | 3.90                                  |
| Experiment 3-1-Plate1-0063 | Kessil Lamp  | 2.35         | 84.11             | 2.93                                  |
| Experiment 3-1-Plate1-0064 | Kessil Lamp  | 1.87         | 84.35             | 2.92                                  |
| Experiment 3-1-Plate1-0065 | Kessil Lamp  | 2.41         | 84.19             | 3.08                                  |
| Experiment 3-1-Plate1-0066 | Kessil Lamp  | 4.11         | 79.53             | 4.57                                  |
| Experiment 3-1-Plate1-0067 | Kessil Lamp  | 1.80         | 85.26             | 2.70                                  |
| Experiment 3-1-Plate1-0068 | Kessil Lamp  | 1.63         | 85.61             | 2.50                                  |
| Experiment 3-1-Plate1-0069 | Kessil Lamp  | 1.81         | 84.90             | 2.63                                  |
| Experiment 3-1-Plate1-0070 | Kessil Lamp  | 2.21         | 84.71             | 2.88                                  |
| Experiment 3-1-Plate1-0071 | Kessil Lamp  | 1.95         | 84.86             | 2.79                                  |
| Experiment 3-1-Plate1-0072 | Kessil Lamp  | 1.89         | 84.82             | 2.88                                  |

|                            |             |      |       |      |
|----------------------------|-------------|------|-------|------|
| Experiment 3-1-Plate1-0073 | Kessil Lamp | 2.29 | 83.46 | 3.14 |
| Experiment 3-1-Plate1-0074 | Kessil Lamp | 2.11 | 83.72 | 3.06 |
| Experiment 3-1-Plate1-0075 | Kessil Lamp | 2.23 | 83.55 | 3.16 |
| Experiment 3-1-Plate1-0076 | Kessil Lamp | 2.66 | 82.98 | 3.24 |
| Experiment 3-1-Plate1-0077 | Kessil Lamp | 2.69 | 83.47 | 3.43 |
| Experiment 3-1-Plate1-0078 | Kessil Lamp | 1.77 | 85.93 | 2.70 |
| Experiment 3-1-Plate1-0079 | Kessil Lamp | 1.86 | 84.52 | 2.78 |
| Experiment 3-1-Plate1-0080 | Kessil Lamp | 1.86 | 84.83 | 2.98 |
| Experiment 3-1-Plate1-0081 | Kessil Lamp | 3.17 | 80.72 | 4.07 |
| Experiment 3-1-Plate1-0082 | Kessil Lamp | 2.12 | 83.32 | 3.15 |
| Experiment 3-1-Plate1-0083 | Kessil Lamp | 2.85 | 82.62 | 3.50 |
| Experiment 3-1-Plate1-0084 | Kessil Lamp | 2.02 | 83.70 | 3.07 |
| Experiment 3-1-Plate1-0085 | Kessil Lamp | 1.99 | 84.95 | 3.05 |
| Experiment 3-1-Plate1-0086 | Kessil Lamp | 2.62 | 82.52 | 3.52 |
| Experiment 3-1-Plate1-0087 | Kessil Lamp | 2.60 | 83.37 | 3.41 |
| Experiment 3-1-Plate1-0088 | Kessil Lamp | 3.10 | 81.19 | 4.02 |
| Experiment 3-1-Plate1-0089 | Kessil Lamp | 2.02 | 83.37 | 3.20 |
| Experiment 3-1-Plate1-0090 | Kessil Lamp | 3.46 | 80.91 | 4.24 |
| Experiment 3-1-Plate1-0091 | Kessil Lamp | 2.25 | 82.61 | 3.58 |
| Experiment 3-1-Plate1-0092 | Kessil Lamp | 2.14 | 83.44 | 3.33 |
| Experiment 3-1-Plate1-0093 | Kessil Lamp | 2.28 | 83.88 | 3.41 |
| Experiment 3-1-Plate1-0094 | Kessil Lamp | 2.36 | 83.01 | 3.33 |
| Experiment 3-1-Plate1-0095 | Kessil Lamp | 2.67 | 82.50 | 3.60 |
| Experiment 3-1-Plate1-0096 | Kessil Lamp | 2.44 | 83.42 | 3.36 |
| Experiment 3-1-Plate1-0097 | Kessil Lamp | 1.97 | 84.46 | 2.84 |
| Experiment 3-1-Plate1-0098 | Kessil Lamp | 2.53 | 82.61 | 3.31 |
| Experiment 3-1-Plate1-0099 | Kessil Lamp | 2.61 | 81.83 | 3.56 |
| Experiment 3-1-Plate1-0100 | Kessil Lamp | 4.45 | 78.95 | 4.66 |
| Experiment 3-1-Plate1-0101 | Kessil Lamp | 2.49 | 82.53 | 3.73 |
| Experiment 3-1-Plate1-0102 | Kessil Lamp | 2.34 | 82.96 | 3.52 |
| Experiment 3-1-Plate1-0103 | Kessil Lamp | 2.40 | 82.78 | 3.49 |
| Experiment 3-1-Plate1-0104 | Kessil Lamp | 2.77 | 81.98 | 3.80 |
| Experiment 3-1-Plate1-0105 | Kessil Lamp | 2.91 | 81.35 | 4.02 |
| Experiment 3-1-Plate1-0106 | Kessil Lamp | 2.70 | 81.62 | 3.89 |
| Experiment 3-1-Plate1-0107 | Kessil Lamp | 2.55 | 82.11 | 3.44 |
| Experiment 3-1-Plate1-0108 | Kessil Lamp | 2.39 | 82.60 | 3.46 |
| Experiment 3-1-Plate1-0109 | Kessil Lamp | 1.78 | 84.34 | 2.75 |
| Experiment 3-1-Plate1-0110 | Kessil Lamp | 2.16 | 83.96 | 3.07 |
| Experiment 3-1-Plate1-0111 | Kessil Lamp | 2.32 | 82.95 | 3.23 |
| Experiment 3-1-Plate1-0112 | Kessil Lamp | 3.72 | 79.93 | 4.18 |
| Experiment 3-1-Plate1-0113 | Kessil Lamp | 2.87 | 80.30 | 3.99 |
| Experiment 3-1-Plate1-0114 | Kessil Lamp | 3.01 | 80.86 | 4.22 |
| Experiment 3-1-Plate1-0115 | Kessil Lamp | 2.87 | 81.24 | 4.21 |
| Experiment 3-1-Plate1-0116 | Kessil Lamp | 5.24 | 75.69 | 5.83 |
| Experiment 3-1-Plate1-0117 | Kessil Lamp | 2.54 | 81.66 | 4.04 |
| Experiment 3-1-Plate1-0118 | Kessil Lamp | 2.40 | 81.44 | 4.04 |
| Experiment 3-1-Plate1-0119 | Kessil Lamp | 3.13 | 80.71 | 4.24 |
| Experiment 3-1-Plate1-0120 | Kessil Lamp | 2.85 | 80.71 | 4.36 |
| Experiment 3-1-Plate1-0121 | Kessil Lamp | 1.98 | 86.05 | 2.81 |
| Experiment 3-1-Plate1-0122 | Kessil Lamp | 1.76 | 85.38 | 2.60 |
| Experiment 3-1-Plate1-0123 | Kessil Lamp | 1.71 | 85.52 | 2.57 |
| Experiment 3-1-Plate1-0124 | Kessil Lamp | 1.96 | 84.13 | 2.86 |
| Experiment 3-1-Plate1-0125 | Kessil Lamp | 2.04 | 83.54 | 2.97 |
| Experiment 3-1-Plate1-0126 | Kessil Lamp | 2.54 | 82.83 | 3.58 |
| Experiment 3-1-Plate1-0127 | Kessil Lamp | 2.32 | 82.73 | 3.41 |
| Experiment 3-1-Plate1-0128 | Kessil Lamp | 2.66 | 79.95 | 4.29 |
| Experiment 3-1-Plate1-0129 | Kessil Lamp | 2.58 | 81.58 | 3.99 |
| Experiment 3-1-Plate1-0130 | Kessil Lamp | 2.33 | 82.77 | 3.73 |
| Experiment 3-1-Plate1-0131 | Kessil Lamp | 2.96 | 80.96 | 4.26 |
| Experiment 3-1-Plate1-0132 | Kessil Lamp | 2.89 | 81.33 | 4.33 |
| Experiment 3-1-Plate1-0133 | Kessil Lamp | 1.76 | 85.60 | 2.67 |
| Experiment 3-1-Plate1-0134 | Kessil Lamp | 2.12 | 83.83 | 2.97 |
| Experiment 3-1-Plate1-0135 | Kessil Lamp | 2.51 | 83.11 | 3.14 |
| Experiment 3-1-Plate1-0136 | Kessil Lamp | 1.83 | 84.26 | 2.81 |
| Experiment 3-1-Plate1-0137 | Kessil Lamp | 1.99 | 84.12 | 2.78 |
| Experiment 3-1-Plate1-0138 | Kessil Lamp | 1.84 | 85.00 | 2.66 |
| Experiment 3-1-Plate1-0139 | Kessil Lamp | 2.08 | 84.54 | 2.88 |
| Experiment 3-1-Plate1-0140 | Kessil Lamp | 2.41 | 83.24 | 3.44 |
| Experiment 3-1-Plate1-0141 | Kessil Lamp | 1.73 | 84.57 | 3.14 |
| Experiment 3-1-Plate1-0142 | Kessil Lamp | 2.15 | 83.51 | 3.14 |
| Experiment 3-1-Plate1-0143 | Kessil Lamp | 2.71 | 83.22 | 3.65 |
| Experiment 3-1-Plate1-0144 | Kessil Lamp | 2.29 | 82.78 | 3.51 |
| Experiment 3-1-Plate1-0145 | Kessil Lamp | 1.61 | 86.01 | 2.72 |

|                            |             |      |       |      |
|----------------------------|-------------|------|-------|------|
| Experiment 3-1-Plate1-0146 | Kessil Lamp | 1.64 | 84.53 | 2.74 |
| Experiment 3-1-Plate1-0147 | Kessil Lamp | 2.94 | 81.03 | 3.68 |
| Experiment 3-1-Plate1-0148 | Kessil Lamp | 1.94 | 84.27 | 2.92 |
| Experiment 3-1-Plate1-0149 | Kessil Lamp | 1.57 | 84.81 | 2.73 |
| Experiment 3-1-Plate1-0150 | Kessil Lamp | 3.76 | 79.96 | 4.52 |
| Experiment 3-1-Plate1-0151 | Kessil Lamp | 2.13 | 83.91 | 3.05 |
| Experiment 3-1-Plate1-0152 | Kessil Lamp | 2.88 | 81.49 | 3.70 |
| Experiment 3-1-Plate1-0153 | Kessil Lamp | 1.59 | 85.18 | 2.84 |
| Experiment 3-1-Plate1-0154 | Kessil Lamp | 5.43 | 77.08 | 5.60 |
| Experiment 3-1-Plate1-0155 | Kessil Lamp | 2.90 | 81.04 | 3.67 |
| Experiment 3-1-Plate1-0156 | Kessil Lamp | 4.22 | 79.76 | 4.77 |
| Experiment 3-1-Plate1-0157 | Kessil Lamp | 1.66 | 85.62 | 2.93 |
| Experiment 3-1-Plate1-0158 | Kessil Lamp | 2.16 | 83.72 | 3.15 |
| Experiment 3-1-Plate1-0159 | Kessil Lamp | 1.88 | 83.66 | 3.29 |
| Experiment 3-1-Plate1-0160 | Kessil Lamp | 2.14 | 83.69 | 3.09 |
| Experiment 3-1-Plate1-0161 | Kessil Lamp | 1.78 | 83.89 | 2.93 |
| Experiment 3-1-Plate1-0162 | Kessil Lamp | 6.89 | 74.23 | 6.42 |
| Experiment 3-1-Plate1-0163 | Kessil Lamp | 2.55 | 82.28 | 3.54 |
| Experiment 3-1-Plate1-0164 | Kessil Lamp | 1.71 | 85.62 | 2.83 |
| Experiment 3-1-Plate1-0165 | Kessil Lamp | 2.16 | 83.90 | 3.19 |
| Experiment 3-1-Plate1-0166 | Kessil Lamp | 2.58 | 82.57 | 3.75 |
| Experiment 3-1-Plate1-0167 | Kessil Lamp | 5.74 | 75.79 | 5.87 |
| Experiment 3-1-Plate1-0168 | Kessil Lamp | 9.64 | 67.03 | 7.86 |
| Experiment 3-1-Plate1-0169 | Kessil Lamp | 1.98 | 84.91 | 3.12 |
| Experiment 3-1-Plate1-0170 | Kessil Lamp | 2.20 | 83.49 | 3.44 |
| Experiment 3-1-Plate1-0171 | Kessil Lamp | 2.43 | 80.60 | 3.85 |
| Experiment 3-1-Plate1-0172 | Kessil Lamp | 3.65 | 79.72 | 4.39 |
| Experiment 3-1-Plate1-0173 | Kessil Lamp | 1.90 | 83.57 | 3.10 |
| Experiment 3-1-Plate1-0174 | Kessil Lamp | 2.43 | 83.17 | 3.71 |
| Experiment 3-1-Plate1-0175 | Kessil Lamp | 2.52 | 81.38 | 3.84 |
| Experiment 3-1-Plate1-0176 | Kessil Lamp | 1.98 | 84.41 | 2.88 |
| Experiment 3-1-Plate1-0177 | Kessil Lamp | 4.06 | 78.82 | 4.76 |
| Experiment 3-1-Plate1-0178 | Kessil Lamp | 2.90 | 83.06 | 3.77 |
| Experiment 3-1-Plate1-0179 | Kessil Lamp | 2.73 | 81.96 | 3.86 |
| Experiment 3-1-Plate1-0180 | Kessil Lamp | 2.55 | 82.31 | 3.60 |
| Experiment 3-1-Plate1-0181 | Kessil Lamp | 2.01 | 83.58 | 3.40 |
| Experiment 3-1-Plate1-0182 | Kessil Lamp | 2.59 | 81.78 | 3.88 |
| Experiment 3-1-Plate1-0183 | Kessil Lamp | 2.33 | 82.83 | 3.61 |
| Experiment 3-1-Plate1-0184 | Kessil Lamp | 2.45 | 82.77 | 3.61 |
| Experiment 3-1-Plate1-0185 | Kessil Lamp | 2.11 | 82.70 | 3.49 |
| Experiment 3-1-Plate1-0186 | Kessil Lamp | 2.14 | 82.89 | 3.46 |
| Experiment 3-1-Plate1-0187 | Kessil Lamp | 2.85 | 82.53 | 3.90 |
| Experiment 3-1-Plate1-0188 | Kessil Lamp | 2.17 | 83.36 | 3.49 |
| Experiment 3-1-Plate1-0189 | Kessil Lamp | 5.13 | 75.88 | 5.97 |
| Experiment 3-1-Plate1-0190 | Kessil Lamp | 5.69 | 75.35 | 6.21 |
| Experiment 3-1-Plate1-0191 | Kessil Lamp | 2.40 | 81.81 | 3.83 |
| Experiment 3-1-Plate1-0192 | Kessil Lamp | 2.48 | 82.76 | 3.50 |
| Experiment 3-1-Plate1-0193 | Kessil Lamp | 2.36 | 83.37 | 3.46 |
| Experiment 3-1-Plate1-0194 | Kessil Lamp | 2.48 | 82.82 | 3.42 |
| Experiment 3-1-Plate1-0195 | Kessil Lamp | 2.39 | 83.78 | 3.17 |
| Experiment 3-1-Plate1-0196 | Kessil Lamp | 2.54 | 84.37 | 3.26 |
| Experiment 3-1-Plate1-0197 | Kessil Lamp | 1.59 | 85.90 | 2.42 |
| Experiment 3-1-Plate1-0198 | Kessil Lamp | 1.77 | 85.07 | 2.59 |
| Experiment 3-1-Plate1-0199 | Kessil Lamp | 2.79 | 83.10 | 3.15 |
| Experiment 3-1-Plate1-0200 | Kessil Lamp | 2.06 | 84.53 | 2.88 |
| Experiment 3-1-Plate1-0201 | Kessil Lamp | 1.62 | 85.55 | 2.47 |
| Experiment 3-1-Plate1-0202 | Kessil Lamp | 0.05 | 87.17 | 2.28 |
| Experiment 3-1-Plate1-0203 | Kessil Lamp | 1.22 | 88.10 | 1.94 |
| Experiment 3-1-Plate1-0204 | Kessil Lamp | 1.73 | 85.72 | 2.51 |
| Experiment 3-1-Plate1-0205 | Kessil Lamp | 1.75 | 85.94 | 2.62 |
| Experiment 3-1-Plate1-0206 | Kessil Lamp | 1.67 | 86.23 | 2.45 |
| Experiment 3-1-Plate1-0207 | Kessil Lamp | 1.48 | 87.28 | 2.38 |
| Experiment 3-1-Plate1-0208 | Kessil Lamp | 1.37 | 88.23 | 2.13 |
| Experiment 3-1-Plate1-0209 | Kessil Lamp | 2.54 | 84.62 | 3.08 |
| Experiment 3-1-Plate1-0210 | Kessil Lamp | 1.59 | 87.60 | 2.15 |
| Experiment 3-1-Plate1-0211 | Kessil Lamp | 1.19 | 88.41 | 1.95 |
| Experiment 3-1-Plate1-0212 | Kessil Lamp | 1.96 | 86.52 | 2.51 |
| Experiment 3-1-Plate1-0213 | Kessil Lamp | 1.38 | 88.08 | 2.11 |
| Experiment 3-1-Plate1-0214 | Kessil Lamp | 2.08 | 86.11 | 2.69 |
| Experiment 3-1-Plate1-0215 | Kessil Lamp | 1.24 | 88.87 | 1.92 |
| Experiment 3-1-Plate1-0216 | Kessil Lamp | 1.78 | 86.93 | 2.34 |
| Experiment 3-1-Plate1-0217 | Kessil Lamp | 1.66 | 86.93 | 2.60 |
| Experiment 3-1-Plate1-0218 | Kessil Lamp | 2.41 | 84.95 | 2.81 |

|                            |             |      |       |      |
|----------------------------|-------------|------|-------|------|
| Experiment 3-1-Plate1-0219 | Kessil Lamp | 1.55 | 87.59 | 2.05 |
| Experiment 3-1-Plate1-0220 | Kessil Lamp | 1.15 | 88.97 | 1.77 |
| Experiment 3-1-Plate1-0221 | Kessil Lamp | 1.96 | 86.77 | 2.39 |
| Experiment 3-1-Plate1-0222 | Kessil Lamp | 1.09 | 89.11 | 1.71 |
| Experiment 3-1-Plate1-0223 | Kessil Lamp | 1.27 | 84.53 | 1.84 |
| Experiment 3-1-Plate1-0224 | Kessil Lamp | 1.75 | 87.58 | 2.30 |
| Experiment 3-1-Plate1-0225 | Kessil Lamp | 1.04 | 89.34 | 1.81 |
| Experiment 3-1-Plate1-0226 | Kessil Lamp | 0.97 | 89.47 | 1.59 |
| Experiment 3-1-Plate1-0227 | Kessil Lamp | 1.23 | 88.88 | 1.78 |
| Experiment 3-1-Plate1-0228 | Kessil Lamp | 1.25 | 87.05 | 1.98 |
| Experiment 3-1-Plate1-0229 | Kessil Lamp | 1.71 | 85.97 | 2.70 |
| Experiment 3-1-Plate1-0230 | Kessil Lamp | 1.79 | 86.80 | 2.53 |
| Experiment 3-1-Plate1-0231 | Kessil Lamp | 1.60 | 87.63 | 2.11 |
| Experiment 3-1-Plate1-0232 | Kessil Lamp | 1.95 | 86.61 | 2.49 |
| Experiment 3-1-Plate1-0233 | Kessil Lamp | 1.52 | 87.93 | 2.05 |
| Experiment 3-1-Plate1-0234 | Kessil Lamp | 0.95 | 89.30 | 1.62 |
| Experiment 3-1-Plate1-0235 | Kessil Lamp | 1.34 | 88.16 | 1.84 |
| Experiment 3-1-Plate1-0236 | Kessil Lamp | 1.02 | 89.60 | 1.59 |
| Experiment 3-1-Plate1-0237 | Kessil Lamp | 1.08 | 89.29 | 1.79 |
| Experiment 3-1-Plate1-0238 | Kessil Lamp | 1.64 | 87.99 | 2.16 |
| Experiment 3-1-Plate1-0239 | Kessil Lamp | 1.38 | 88.57 | 1.92 |
| Experiment 3-1-Plate1-0240 | Kessil Lamp | 1.07 | 88.39 | 1.75 |
| Experiment 3-1-Plate1-0241 | Kessil Lamp | 1.90 | 85.95 | 2.67 |
| Experiment 3-1-Plate1-0242 | Kessil Lamp | 2.27 | 85.46 | 2.72 |
| Experiment 3-1-Plate1-0243 | Kessil Lamp | 1.73 | 87.40 | 2.10 |
| Experiment 3-1-Plate1-0244 | Kessil Lamp | 1.35 | 88.31 | 1.92 |
| Experiment 3-1-Plate1-0245 | Kessil Lamp | 1.56 | 87.05 | 2.18 |
| Experiment 3-1-Plate1-0246 | Kessil Lamp | 0.00 | 89.45 | 1.66 |
| Experiment 3-1-Plate1-0247 | Kessil Lamp | 1.48 | 88.05 | 2.09 |
| Experiment 3-1-Plate1-0248 | Kessil Lamp | 1.05 | 89.42 | 1.66 |
| Experiment 3-1-Plate1-0249 | Kessil Lamp | 0.00 | 88.85 | 1.89 |
| Experiment 3-1-Plate1-0250 | Kessil Lamp | 1.12 | 89.29 | 1.72 |
| Experiment 3-1-Plate1-0251 | Kessil Lamp | 1.13 | 88.80 | 1.62 |
| Experiment 3-1-Plate1-0252 | Kessil Lamp | 1.72 | 86.46 | 2.55 |
| Experiment 3-1-Plate1-0253 | Kessil Lamp | 1.98 | 85.18 | 3.05 |
| Experiment 3-1-Plate1-0254 | Kessil Lamp | 2.55 | 84.12 | 3.35 |
| Experiment 3-1-Plate1-0255 | Kessil Lamp | 1.47 | 87.36 | 2.08 |
| Experiment 3-1-Plate1-0256 | Kessil Lamp | 1.61 | 87.24 | 2.26 |
| Experiment 3-1-Plate1-0257 | Kessil Lamp | 1.30 | 88.51 | 1.90 |
| Experiment 3-1-Plate1-0258 | Kessil Lamp | 1.07 | 88.72 | 1.85 |
| Experiment 3-1-Plate1-0259 | Kessil Lamp | 1.34 | 88.41 | 1.71 |
| Experiment 3-1-Plate1-0260 | Kessil Lamp | 1.33 | 88.94 | 1.86 |
| Experiment 3-1-Plate1-0261 | Kessil Lamp | 1.07 | 89.07 | 1.63 |
| Experiment 3-1-Plate1-0262 | Kessil Lamp | 1.34 | 88.45 | 1.66 |
| Experiment 3-1-Plate1-0263 | Kessil Lamp | 1.02 | 89.49 | 1.51 |
| Experiment 3-1-Plate1-0264 | Kessil Lamp | 1.25 | 88.50 | 1.72 |
| Experiment 3-1-Plate1-0265 | Kessil Lamp | 1.84 | 79.05 | 3.05 |
| Experiment 3-1-Plate1-0266 | Kessil Lamp | 2.32 | 84.08 | 3.47 |
| Experiment 3-1-Plate1-0267 | Kessil Lamp | 1.69 | 86.52 | 2.67 |
| Experiment 3-1-Plate1-0268 | Kessil Lamp | 1.29 | 87.67 | 2.28 |
| Experiment 3-1-Plate1-0269 | Kessil Lamp | 1.70 | 87.24 | 2.41 |
| Experiment 3-1-Plate1-0270 | Kessil Lamp | 1.99 | 86.63 | 2.49 |
| Experiment 3-1-Plate1-0271 | Kessil Lamp | 1.31 | 88.28 | 1.92 |
| Experiment 3-1-Plate1-0272 | Kessil Lamp | 1.27 | 88.54 | 1.89 |
| Experiment 3-1-Plate1-0273 | Kessil Lamp | 1.65 | 87.35 | 2.20 |
| Experiment 3-1-Plate1-0274 | Kessil Lamp | 2.20 | 86.36 | 2.47 |
| Experiment 3-1-Plate1-0275 | Kessil Lamp | 2.12 | 86.42 | 2.23 |
| Experiment 3-1-Plate1-0276 | Kessil Lamp | 1.01 | 88.63 | 1.68 |
| Experiment 3-1-Plate1-0277 | Kessil Lamp | 2.43 | 83.83 | 3.47 |
| Experiment 3-1-Plate1-0278 | Kessil Lamp | 2.41 | 83.67 | 3.58 |
| Experiment 3-1-Plate1-0279 | Kessil Lamp | 1.70 | 86.03 | 2.96 |
| Experiment 3-1-Plate1-0280 | Kessil Lamp | 1.68 | 86.84 | 2.62 |
| Experiment 3-1-Plate1-0281 | Kessil Lamp | 1.66 | 86.89 | 2.56 |
| Experiment 3-1-Plate1-0282 | Kessil Lamp | 1.79 | 86.56 | 2.62 |
| Experiment 3-1-Plate1-0283 | Kessil Lamp | 1.90 | 86.87 | 2.36 |
| Experiment 3-1-Plate1-0284 | Kessil Lamp | 1.05 | 89.48 | 1.92 |
| Experiment 3-1-Plate1-0285 | Kessil Lamp | 1.49 | 87.84 | 2.04 |
| Experiment 3-1-Plate1-0286 | Kessil Lamp | 1.31 | 88.81 | 1.68 |
| Experiment 3-1-Plate1-0287 | Kessil Lamp | 1.27 | 88.65 | 1.60 |
| Experiment 3-1-Plate1-0288 | Kessil Lamp | 2.06 | 87.09 | 2.26 |
| Experiment 3-1-Plate1-0289 | Kessil Lamp | 2.77 | 82.96 | 3.57 |
| Experiment 3-1-Plate1-0290 | Kessil Lamp | 2.44 | 83.50 | 3.47 |
| Experiment 3-1-Plate1-0291 | Kessil Lamp | 2.07 | 85.10 | 2.84 |

|                            |             |       |       |      |
|----------------------------|-------------|-------|-------|------|
| Experiment 3-1-Plate1-0292 | Kessil Lamp | 1.83  | 85.43 | 2.85 |
| Experiment 3-1-Plate1-0293 | Kessil Lamp | 1.39  | 87.56 | 2.33 |
| Experiment 3-1-Plate1-0294 | Kessil Lamp | 2.08  | 85.72 | 2.71 |
| Experiment 3-1-Plate1-0295 | Kessil Lamp | 4.73  | 79.07 | 4.79 |
| Experiment 3-1-Plate1-0296 | Kessil Lamp | 2.19  | 85.73 | 2.70 |
| Experiment 3-1-Plate1-0297 | Kessil Lamp | 1.44  | 87.88 | 2.23 |
| Experiment 3-1-Plate1-0298 | Kessil Lamp | 1.08  | 88.76 | 1.80 |
| Experiment 3-1-Plate1-0299 | Kessil Lamp | 1.55  | 88.05 | 2.09 |
| Experiment 3-1-Plate1-0300 | Kessil Lamp | 1.74  | 87.10 | 2.12 |
| Experiment 3-1-Plate1-0301 | Kessil Lamp | 2.67  | 81.66 | 4.23 |
| Experiment 3-1-Plate1-0302 | Kessil Lamp | 2.98  | 82.10 | 4.17 |
| Experiment 3-1-Plate1-0303 | Kessil Lamp | 2.20  | 83.81 | 3.71 |
| Experiment 3-1-Plate1-0304 | Kessil Lamp | 2.50  | 83.76 | 3.61 |
| Experiment 3-1-Plate1-0305 | Kessil Lamp | 2.10  | 85.00 | 3.13 |
| Experiment 3-1-Plate1-0306 | Kessil Lamp | 2.29  | 84.96 | 3.16 |
| Experiment 3-1-Plate1-0307 | Kessil Lamp | 1.64  | 86.52 | 2.59 |
| Experiment 3-1-Plate1-0308 | Kessil Lamp | 1.74  | 86.65 | 2.65 |
| Experiment 3-1-Plate1-0309 | Kessil Lamp | 1.38  | 87.63 | 2.30 |
| Experiment 3-1-Plate1-0310 | Kessil Lamp | 1.28  | 88.16 | 1.96 |
| Experiment 3-1-Plate1-0311 | Kessil Lamp | 2.59  | 85.00 | 2.66 |
| Experiment 3-1-Plate1-0312 | Kessil Lamp | 1.72  | 87.46 | 2.07 |
| Experiment 3-1-Plate1-0313 | Kessil Lamp | 2.46  | 82.91 | 3.83 |
| Experiment 3-1-Plate1-0314 | Kessil Lamp | 2.54  | 82.97 | 3.89 |
| Experiment 3-1-Plate1-0315 | Kessil Lamp | 2.82  | 81.47 | 4.36 |
| Experiment 3-1-Plate1-0316 | Kessil Lamp | 2.36  | 83.44 | 3.84 |
| Experiment 3-1-Plate1-0317 | Kessil Lamp | 1.96  | 85.04 | 3.17 |
| Experiment 3-1-Plate1-0318 | Kessil Lamp | 2.03  | 85.11 | 3.16 |
| Experiment 3-1-Plate1-0319 | Kessil Lamp | 2.47  | 83.75 | 3.35 |
| Experiment 3-1-Plate1-0320 | Kessil Lamp | 2.66  | 83.99 | 3.48 |
| Experiment 3-1-Plate1-0321 | Kessil Lamp | 1.67  | 86.63 | 2.46 |
| Experiment 3-1-Plate1-0322 | Kessil Lamp | 4.08  | 81.15 | 3.74 |
| Experiment 3-1-Plate1-0323 | Kessil Lamp | 1.69  | 87.19 | 2.23 |
| Experiment 3-1-Plate1-0324 | Kessil Lamp | 1.52  | 86.99 | 2.11 |
| Experiment 3-1-Plate1-0325 | Kessil Lamp | 5.46  | 76.34 | 5.86 |
| Experiment 3-1-Plate1-0326 | Kessil Lamp | 2.64  | 82.34 | 3.95 |
| Experiment 3-1-Plate1-0327 | Kessil Lamp | 3.06  | 81.36 | 4.14 |
| Experiment 3-1-Plate1-0328 | Kessil Lamp | 5.11  | 77.21 | 5.69 |
| Experiment 3-1-Plate1-0329 | Kessil Lamp | 2.49  | 83.19 | 3.62 |
| Experiment 3-1-Plate1-0330 | Kessil Lamp | 2.94  | 82.03 | 4.03 |
| Experiment 3-1-Plate1-0331 | Kessil Lamp | 2.24  | 84.44 | 3.34 |
| Experiment 3-1-Plate1-0332 | Kessil Lamp | 2.16  | 84.89 | 3.37 |
| Experiment 3-1-Plate1-0333 | Kessil Lamp | 2.11  | 84.88 | 3.09 |
| Experiment 3-1-Plate1-0334 | Kessil Lamp | 1.94  | 85.60 | 2.69 |
| Experiment 3-1-Plate1-0335 | Kessil Lamp | 2.72  | 84.45 | 3.03 |
| Experiment 3-1-Plate1-0336 | Kessil Lamp | 2.62  | 84.16 | 3.02 |
| Experiment 3-1-Plate1-0337 | Kessil Lamp | 10.53 | 66.53 | 9.47 |
| Experiment 3-1-Plate1-0338 | Kessil Lamp | 4.94  | 79.19 | 5.01 |
| Experiment 3-1-Plate1-0339 | Kessil Lamp | 2.21  | 84.21 | 3.08 |
| Experiment 3-1-Plate1-0340 | Kessil Lamp | 2.46  | 82.81 | 3.68 |
| Experiment 3-1-Plate1-0341 | Kessil Lamp | 2.76  | 82.07 | 3.91 |
| Experiment 3-1-Plate1-0342 | Kessil Lamp | 3.69  | 79.72 | 4.60 |
| Experiment 3-1-Plate1-0343 | Kessil Lamp | 2.41  | 83.14 | 3.55 |
| Experiment 3-1-Plate1-0344 | Kessil Lamp | 2.76  | 82.61 | 4.02 |
| Experiment 3-1-Plate1-0345 | Kessil Lamp | 2.10  | 84.31 | 3.33 |
| Experiment 3-1-Plate1-0346 | Kessil Lamp | 2.19  | 84.74 | 3.27 |
| Experiment 3-1-Plate1-0347 | Kessil Lamp | 2.86  | 82.80 | 3.62 |
| Experiment 3-1-Plate1-0348 | Kessil Lamp | 1.98  | 85.42 | 2.94 |
| Experiment 3-1-Plate1-0349 | Kessil Lamp | 4.70  | 79.51 | 5.12 |
| Experiment 3-1-Plate1-0350 | Kessil Lamp | 3.41  | 82.35 | 3.81 |
| Experiment 3-1-Plate1-0351 | Kessil Lamp | 2.48  | 83.64 | 3.54 |
| Experiment 3-1-Plate1-0352 | Kessil Lamp | 2.27  | 83.55 | 3.54 |
| Experiment 3-1-Plate1-0353 | Kessil Lamp | 2.79  | 81.94 | 4.23 |
| Experiment 3-1-Plate1-0354 | Kessil Lamp | 2.50  | 82.06 | 4.09 |
| Experiment 3-1-Plate1-0355 | Kessil Lamp | 2.47  | 82.59 | 4.10 |
| Experiment 3-1-Plate1-0356 | Kessil Lamp | 2.58  | 82.74 | 3.99 |
| Experiment 3-1-Plate1-0357 | Kessil Lamp | 2.50  | 83.21 | 3.63 |
| Experiment 3-1-Plate1-0358 | Kessil Lamp | 2.56  | 82.90 | 3.75 |
| Experiment 3-1-Plate1-0359 | Kessil Lamp | 2.53  | 83.52 | 3.55 |
| Experiment 3-1-Plate1-0360 | Kessil Lamp | 2.23  | 83.87 | 3.34 |
| Experiment 3-1-Plate1-0361 | Kessil Lamp | 4.93  | 78.78 | 5.04 |
| Experiment 3-1-Plate1-0362 | Kessil Lamp | 1.91  | 85.59 | 2.91 |
| Experiment 3-1-Plate1-0363 | Kessil Lamp | 2.17  | 84.66 | 3.16 |
| Experiment 3-1-Plate1-0364 | Kessil Lamp | 2.50  | 83.56 | 3.41 |

|                            |             |      |       |      |
|----------------------------|-------------|------|-------|------|
| Experiment 3-1-Plate1-0365 | Kessil Lamp | 2.62 | 83.51 | 3.58 |
| Experiment 3-1-Plate1-0366 | Kessil Lamp | 2.80 | 82.19 | 4.34 |
| Experiment 3-1-Plate1-0367 | Kessil Lamp | 3.48 | 79.35 | 4.76 |
| Experiment 3-1-Plate1-0368 | Kessil Lamp | 2.91 | 81.09 | 4.30 |
| Experiment 3-1-Plate1-0369 | Kessil Lamp | 3.04 | 81.40 | 4.38 |
| Experiment 3-1-Plate1-0370 | Kessil Lamp | 2.32 | 83.37 | 3.65 |
| Experiment 3-1-Plate1-0371 | Kessil Lamp | 2.38 | 83.39 | 3.58 |
| Experiment 3-1-Plate1-0372 | Kessil Lamp | 2.49 | 83.08 | 3.67 |
| Experiment 3-1-Plate1-0373 | Kessil Lamp | 2.47 | 84.38 | 3.41 |
| Experiment 3-1-Plate1-0374 | Kessil Lamp | 3.24 | 81.77 | 4.13 |
| Experiment 3-1-Plate1-0375 | Kessil Lamp | 2.70 | 83.24 | 3.87 |
| Experiment 3-1-Plate1-0376 | Kessil Lamp | 2.43 | 83.78 | 3.74 |
| Experiment 3-1-Plate1-0377 | Kessil Lamp | 2.14 | 83.77 | 3.38 |
| Experiment 3-1-Plate1-0378 | Kessil Lamp | 2.84 | 81.17 | 4.19 |
| Experiment 3-1-Plate1-0379 | Kessil Lamp | 2.68 | 78.08 | 4.31 |
| Experiment 3-1-Plate1-0380 | Kessil Lamp | 2.97 | 80.26 | 4.43 |
| Experiment 3-1-Plate1-0381 | Kessil Lamp | 3.28 | 79.87 | 4.55 |
| Experiment 3-1-Plate1-0382 | Kessil Lamp | 3.27 | 81.12 | 4.48 |
| Experiment 3-1-Plate1-0383 | Kessil Lamp | 4.47 | 78.67 | 4.93 |
| Experiment 3-1-Plate1-0384 | Kessil Lamp | 2.53 | 82.98 | 3.91 |
| Experiment 3-1-Plate2-0001 | Lumidox 1   | 4.95 | 76.31 | 5.36 |
| Experiment 3-1-Plate2-0002 | Lumidox 1   | 5.24 | 75.74 | 5.60 |
| Experiment 3-1-Plate2-0003 | Lumidox 1   | 5.46 | 75.11 | 5.78 |
| Experiment 3-1-Plate2-0004 | Lumidox 1   | 5.70 | 74.43 | 5.98 |
| Experiment 3-1-Plate2-0005 | Lumidox 1   | 5.70 | 74.03 | 6.00 |
| Experiment 3-1-Plate2-0006 | Lumidox 1   | 5.62 | 75.68 | 5.71 |
| Experiment 3-1-Plate2-0007 | Lumidox 1   | 5.92 | 74.31 | 6.20 |
| Experiment 3-1-Plate2-0008 | Lumidox 1   | 6.17 | 73.90 | 6.26 |
| Experiment 3-1-Plate2-0009 | Lumidox 1   | 6.28 | 73.56 | 6.62 |
| Experiment 3-1-Plate2-0010 | Lumidox 1   | 6.18 | 73.27 | 6.36 |
| Experiment 3-1-Plate2-0011 | Lumidox 1   | 5.67 | 74.53 | 6.02 |
| Experiment 3-1-Plate2-0012 | Lumidox 1   | 6.48 | 72.77 | 6.48 |
| Experiment 3-1-Plate2-0013 | Lumidox 1   | 5.23 | 75.76 | 5.76 |
| Experiment 3-1-Plate2-0014 | Lumidox 1   | 5.71 | 74.76 | 5.91 |
| Experiment 3-1-Plate2-0015 | Lumidox 1   | 6.05 | 73.58 | 6.31 |
| Experiment 3-1-Plate2-0016 | Lumidox 1   | 5.99 | 73.83 | 6.31 |
| Experiment 3-1-Plate2-0017 | Lumidox 1   | 6.34 | 73.41 | 6.53 |
| Experiment 3-1-Plate2-0018 | Lumidox 1   | 6.36 | 73.04 | 6.36 |
| Experiment 3-1-Plate2-0019 | Lumidox 1   | 6.86 | 71.73 | 6.88 |
| Experiment 3-1-Plate2-0020 | Lumidox 1   | 6.77 | 72.35 | 6.71 |
| Experiment 3-1-Plate2-0021 | Lumidox 1   | 6.79 | 71.49 | 7.02 |
| Experiment 3-1-Plate2-0022 | Lumidox 1   | 7.00 | 71.46 | 7.05 |
| Experiment 3-1-Plate2-0023 | Lumidox 1   | 7.00 | 71.39 | 7.02 |
| Experiment 3-1-Plate2-0024 | Lumidox 1   | 6.68 | 72.15 | 6.67 |
| Experiment 3-1-Plate2-0025 | Lumidox 1   | 5.52 | 75.28 | 5.89 |
| Experiment 3-1-Plate2-0026 | Lumidox 1   | 5.97 | 73.88 | 6.17 |
| Experiment 3-1-Plate2-0027 | Lumidox 1   | 6.29 | 73.27 | 6.33 |
| Experiment 3-1-Plate2-0028 | Lumidox 1   | 6.36 | 73.40 | 6.67 |
| Experiment 3-1-Plate2-0029 | Lumidox 1   | 6.97 | 71.67 | 7.03 |
| Experiment 3-1-Plate2-0030 | Lumidox 1   | 6.88 | 72.49 | 6.82 |
| Experiment 3-1-Plate2-0031 | Lumidox 1   | 7.79 | 69.74 | 7.36 |
| Experiment 3-1-Plate2-0032 | Lumidox 1   | 6.94 | 71.57 | 6.99 |
| Experiment 3-1-Plate2-0033 | Lumidox 1   | 7.28 | 70.96 | 7.22 |
| Experiment 3-1-Plate2-0034 | Lumidox 1   | 7.12 | 71.22 | 7.21 |
| Experiment 3-1-Plate2-0035 | Lumidox 1   | 7.69 | 69.50 | 7.45 |
| Experiment 3-1-Plate2-0036 | Lumidox 1   | 8.01 | 69.41 | 7.26 |
| Experiment 3-1-Plate2-0037 | Lumidox 1   | 5.60 | 75.76 | 5.94 |
| Experiment 3-1-Plate2-0038 | Lumidox 1   | 6.34 | 73.06 | 6.41 |
| Experiment 3-1-Plate2-0039 | Lumidox 1   | 6.56 | 72.52 | 6.62 |
| Experiment 3-1-Plate2-0040 | Lumidox 1   | 6.83 | 72.21 | 6.91 |
| Experiment 3-1-Plate2-0041 | Lumidox 1   | 7.11 | 71.76 | 7.12 |
| Experiment 3-1-Plate2-0042 | Lumidox 1   | 7.23 | 71.40 | 7.09 |
| Experiment 3-1-Plate2-0043 | Lumidox 1   | 7.61 | 69.98 | 7.54 |
| Experiment 3-1-Plate2-0044 | Lumidox 1   | 7.64 | 70.69 | 7.57 |
| Experiment 3-1-Plate2-0045 | Lumidox 1   | 7.84 | 69.95 | 7.57 |
| Experiment 3-1-Plate2-0046 | Lumidox 1   | 7.85 | 70.06 | 7.23 |
| Experiment 3-1-Plate2-0047 | Lumidox 1   | 8.31 | 69.04 | 7.40 |
| Experiment 3-1-Plate2-0048 | Lumidox 1   | 8.25 | 68.73 | 7.57 |
| Experiment 3-1-Plate2-0049 | Lumidox 1   | 5.93 | 73.85 | 6.15 |
| Experiment 3-1-Plate2-0050 | Lumidox 1   | 6.45 | 72.24 | 6.43 |
| Experiment 3-1-Plate2-0051 | Lumidox 1   | 7.03 | 71.68 | 6.49 |
| Experiment 3-1-Plate2-0052 | Lumidox 1   | 7.42 | 70.87 | 6.54 |
| Experiment 3-1-Plate2-0053 | Lumidox 1   | 7.32 | 71.55 | 7.10 |

|                            |           |      |       |      |
|----------------------------|-----------|------|-------|------|
| Experiment 3-1-Plate2-0054 | Lumidox 1 | 7.67 | 69.96 | 7.45 |
| Experiment 3-1-Plate2-0055 | Lumidox 1 | 7.78 | 69.73 | 7.49 |
| Experiment 3-1-Plate2-0056 | Lumidox 1 | 7.79 | 69.22 | 7.85 |
| Experiment 3-1-Plate2-0057 | Lumidox 1 | 7.91 | 68.81 | 8.05 |
| Experiment 3-1-Plate2-0058 | Lumidox 1 | 8.27 | 68.66 | 7.45 |
| Experiment 3-1-Plate2-0059 | Lumidox 1 | 8.62 | 67.85 | 7.61 |
| Experiment 3-1-Plate2-0060 | Lumidox 1 | 8.64 | 67.70 | 7.47 |
| Experiment 3-1-Plate2-0061 | Lumidox 1 | 6.86 | 71.07 | 6.42 |
| Experiment 3-1-Plate2-0062 | Lumidox 1 | 6.92 | 71.40 | 6.41 |
| Experiment 3-1-Plate2-0063 | Lumidox 1 | 7.26 | 71.84 | 6.44 |
| Experiment 3-1-Plate2-0064 | Lumidox 1 | 8.10 | 68.97 | 7.15 |
| Experiment 3-1-Plate2-0065 | Lumidox 1 | 7.54 | 70.28 | 7.41 |
| Experiment 3-1-Plate2-0066 | Lumidox 1 | 7.36 | 71.13 | 7.36 |
| Experiment 3-1-Plate2-0067 | Lumidox 1 | 8.13 | 68.26 | 7.65 |
| Experiment 3-1-Plate2-0068 | Lumidox 1 | 8.24 | 68.27 | 8.22 |
| Experiment 3-1-Plate2-0069 | Lumidox 1 | 8.32 | 68.56 | 7.80 |
| Experiment 3-1-Plate2-0070 | Lumidox 1 | 8.80 | 66.31 | 8.26 |
| Experiment 3-1-Plate2-0071 | Lumidox 1 | 8.56 | 68.19 | 7.79 |
| Experiment 3-1-Plate2-0072 | Lumidox 1 | 8.23 | 68.81 | 7.98 |
| Experiment 3-1-Plate2-0073 | Lumidox 1 | 6.51 | 72.91 | 5.75 |
| Experiment 3-1-Plate2-0074 | Lumidox 1 | 7.08 | 71.77 | 6.24 |
| Experiment 3-1-Plate2-0075 | Lumidox 1 | 7.67 | 70.49 | 6.56 |
| Experiment 3-1-Plate2-0076 | Lumidox 1 | 7.66 | 70.23 | 7.09 |
| Experiment 3-1-Plate2-0077 | Lumidox 1 | 7.76 | 69.96 | 7.25 |
| Experiment 3-1-Plate2-0078 | Lumidox 1 | 7.87 | 70.32 | 7.37 |
| Experiment 3-1-Plate2-0079 | Lumidox 1 | 8.04 | 68.86 | 7.82 |
| Experiment 3-1-Plate2-0080 | Lumidox 1 | 8.20 | 68.43 | 7.99 |
| Experiment 3-1-Plate2-0081 | Lumidox 1 | 7.94 | 69.05 | 7.82 |
| Experiment 3-1-Plate2-0082 | Lumidox 1 | 8.35 | 68.21 | 8.10 |
| Experiment 3-1-Plate2-0083 | Lumidox 1 | 8.20 | 68.77 | 7.97 |
| Experiment 3-1-Plate2-0084 | Lumidox 1 | 8.58 | 67.95 | 8.10 |
| Experiment 3-1-Plate2-0085 | Lumidox 1 | 6.73 | 72.94 | 5.85 |
| Experiment 3-1-Plate2-0086 | Lumidox 1 | 7.41 | 70.45 | 6.20 |
| Experiment 3-1-Plate2-0087 | Lumidox 1 | 7.83 | 70.10 | 6.72 |
| Experiment 3-1-Plate2-0088 | Lumidox 1 | 8.07 | 69.75 | 6.48 |
| Experiment 3-1-Plate2-0089 | Lumidox 1 | 7.88 | 69.80 | 7.13 |
| Experiment 3-1-Plate2-0090 | Lumidox 1 | 8.19 | 69.38 | 7.73 |
| Experiment 3-1-Plate2-0091 | Lumidox 1 | 7.77 | 70.23 | 7.56 |
| Experiment 3-1-Plate2-0092 | Lumidox 1 | 8.13 | 68.79 | 8.13 |
| Experiment 3-1-Plate2-0093 | Lumidox 1 | 8.34 | 68.61 | 8.04 |
| Experiment 3-1-Plate2-0094 | Lumidox 1 | 8.39 | 68.22 | 8.20 |
| Experiment 3-1-Plate2-0095 | Lumidox 1 | 8.46 | 67.83 | 7.64 |
| Experiment 3-1-Plate2-0096 | Lumidox 1 | 8.57 | 67.62 | 8.18 |
| Experiment 3-1-Plate2-0097 | Lumidox 1 | 6.32 | 73.33 | 6.00 |
| Experiment 3-1-Plate2-0098 | Lumidox 1 | 7.06 | 71.14 | 6.45 |
| Experiment 3-1-Plate2-0099 | Lumidox 1 | 7.73 | 70.42 | 6.53 |
| Experiment 3-1-Plate2-0100 | Lumidox 1 | 7.98 | 70.17 | 6.69 |
| Experiment 3-1-Plate2-0101 | Lumidox 1 | 8.17 | 69.86 | 7.10 |
| Experiment 3-1-Plate2-0102 | Lumidox 1 | 8.29 | 69.79 | 7.18 |
| Experiment 3-1-Plate2-0103 | Lumidox 1 | 8.55 | 69.19 | 7.53 |
| Experiment 3-1-Plate2-0104 | Lumidox 1 | 8.42 | 69.16 | 7.97 |
| Experiment 3-1-Plate2-0105 | Lumidox 1 | 8.59 | 68.53 | 7.70 |
| Experiment 3-1-Plate2-0106 | Lumidox 1 | 8.49 | 67.98 | 8.15 |
| Experiment 3-1-Plate2-0107 | Lumidox 1 | 8.54 | 67.89 | 8.12 |
| Experiment 3-1-Plate2-0108 | Lumidox 1 | 8.61 | 67.76 | 8.24 |
| Experiment 3-1-Plate2-0109 | Lumidox 1 | 6.61 | 72.61 | 5.89 |
| Experiment 3-1-Plate2-0110 | Lumidox 1 | 7.31 | 71.17 | 6.19 |
| Experiment 3-1-Plate2-0111 | Lumidox 1 | 7.57 | 70.28 | 6.67 |
| Experiment 3-1-Plate2-0112 | Lumidox 1 | 7.78 | 70.12 | 7.07 |
| Experiment 3-1-Plate2-0113 | Lumidox 1 | 8.46 | 67.69 | 7.76 |
| Experiment 3-1-Plate2-0114 | Lumidox 1 | 8.00 | 69.74 | 7.54 |
| Experiment 3-1-Plate2-0115 | Lumidox 1 | 8.28 | 68.62 | 7.73 |
| Experiment 3-1-Plate2-0116 | Lumidox 1 | 8.10 | 68.87 | 7.95 |
| Experiment 3-1-Plate2-0117 | Lumidox 1 | 7.99 | 69.50 | 7.88 |
| Experiment 3-1-Plate2-0118 | Lumidox 1 | 8.68 | 68.30 | 8.26 |
| Experiment 3-1-Plate2-0119 | Lumidox 1 | 8.48 | 68.07 | 8.09 |
| Experiment 3-1-Plate2-0120 | Lumidox 1 | 8.72 | 67.38 | 8.67 |
| Experiment 3-1-Plate2-0121 | Lumidox 1 | 6.45 | 73.28 | 5.99 |
| Experiment 3-1-Plate2-0122 | Lumidox 1 | 7.31 | 70.80 | 6.28 |
| Experiment 3-1-Plate2-0123 | Lumidox 1 | 7.48 | 70.56 | 6.53 |
| Experiment 3-1-Plate2-0124 | Lumidox 1 | 7.66 | 70.00 | 7.00 |
| Experiment 3-1-Plate2-0125 | Lumidox 1 | 8.26 | 69.12 | 7.31 |
| Experiment 3-1-Plate2-0126 | Lumidox 1 | 8.06 | 69.25 | 7.23 |

|                            |           |      |       |      |
|----------------------------|-----------|------|-------|------|
| Experiment 3-1-Plate2-0127 | Lumidox 1 | 7.58 | 70.65 | 7.43 |
| Experiment 3-1-Plate2-0128 | Lumidox 1 | 8.23 | 68.29 | 8.18 |
| Experiment 3-1-Plate2-0129 | Lumidox 1 | 8.19 | 69.10 | 7.86 |
| Experiment 3-1-Plate2-0130 | Lumidox 1 | 8.61 | 67.32 | 8.31 |
| Experiment 3-1-Plate2-0131 | Lumidox 1 | 8.42 | 68.49 | 8.21 |
| Experiment 3-1-Plate2-0132 | Lumidox 1 | 8.40 | 68.20 | 8.15 |
| Experiment 3-1-Plate2-0133 | Lumidox 1 | 5.98 | 74.47 | 6.04 |
| Experiment 3-1-Plate2-0134 | Lumidox 1 | 7.11 | 71.62 | 6.19 |
| Experiment 3-1-Plate2-0135 | Lumidox 1 | 7.66 | 69.92 | 6.70 |
| Experiment 3-1-Plate2-0136 | Lumidox 1 | 7.68 | 69.99 | 7.33 |
| Experiment 3-1-Plate2-0137 | Lumidox 1 | 7.58 | 70.60 | 7.42 |
| Experiment 3-1-Plate2-0138 | Lumidox 1 | 8.03 | 69.55 | 7.16 |
| Experiment 3-1-Plate2-0139 | Lumidox 1 | 7.87 | 70.21 | 7.69 |
| Experiment 3-1-Plate2-0140 | Lumidox 1 | 7.91 | 69.74 | 7.75 |
| Experiment 3-1-Plate2-0141 | Lumidox 1 | 8.25 | 68.40 | 8.00 |
| Experiment 3-1-Plate2-0142 | Lumidox 1 | 7.56 | 71.19 | 7.65 |
| Experiment 3-1-Plate2-0143 | Lumidox 1 | 7.93 | 70.63 | 7.76 |
| Experiment 3-1-Plate2-0144 | Lumidox 1 | 8.34 | 70.52 | 7.31 |
| Experiment 3-1-Plate2-0145 | Lumidox 1 | 5.81 | 74.54 | 6.17 |
| Experiment 3-1-Plate2-0146 | Lumidox 1 | 6.56 | 72.49 | 6.57 |
| Experiment 3-1-Plate2-0147 | Lumidox 1 | 7.19 | 71.22 | 6.49 |
| Experiment 3-1-Plate2-0148 | Lumidox 1 | 7.36 | 70.48 | 7.29 |
| Experiment 3-1-Plate2-0149 | Lumidox 1 | 7.34 | 70.62 | 7.15 |
| Experiment 3-1-Plate2-0150 | Lumidox 1 | 7.53 | 71.38 | 7.36 |
| Experiment 3-1-Plate2-0151 | Lumidox 1 | 7.85 | 70.17 | 7.65 |
| Experiment 3-1-Plate2-0152 | Lumidox 1 | 7.60 | 70.60 | 7.48 |
| Experiment 3-1-Plate2-0153 | Lumidox 1 | 8.24 | 69.10 | 7.27 |
| Experiment 3-1-Plate2-0154 | Lumidox 1 | 9.27 | 68.16 | 7.99 |
| Experiment 3-1-Plate2-0155 | Lumidox 1 | 9.35 | 66.50 | 8.01 |
| Experiment 3-1-Plate2-0156 | Lumidox 1 | 9.82 | 68.05 | 8.26 |
| Experiment 3-1-Plate2-0157 | Lumidox 1 | 5.60 | 75.41 | 5.95 |
| Experiment 3-1-Plate2-0158 | Lumidox 1 | 6.26 | 73.44 | 6.38 |
| Experiment 3-1-Plate2-0159 | Lumidox 1 | 6.58 | 72.01 | 6.77 |
| Experiment 3-1-Plate2-0160 | Lumidox 1 | 7.11 | 70.63 | 7.23 |
| Experiment 3-1-Plate2-0161 | Lumidox 1 | 7.23 | 70.67 | 7.38 |
| Experiment 3-1-Plate2-0162 | Lumidox 1 | 9.74 | 67.88 | 8.95 |
| Experiment 3-1-Plate2-0163 | Lumidox 1 | 7.47 | 71.10 | 7.28 |
| Experiment 3-1-Plate2-0164 | Lumidox 1 | 7.78 | 69.59 | 7.61 |
| Experiment 3-1-Plate2-0165 | Lumidox 1 | 7.99 | 70.49 | 7.21 |
| Experiment 3-1-Plate2-0166 | Lumidox 1 | 7.88 | 70.80 | 7.42 |
| Experiment 3-1-Plate2-0167 | Lumidox 1 | 7.44 | 71.50 | 7.16 |
| Experiment 3-1-Plate2-0168 | Lumidox 1 | 8.96 | 67.01 | 7.81 |
| Experiment 3-1-Plate2-0169 | Lumidox 1 | 5.49 | 74.96 | 5.87 |
| Experiment 3-1-Plate2-0170 | Lumidox 1 | 5.89 | 74.14 | 6.22 |
| Experiment 3-1-Plate2-0171 | Lumidox 1 | 5.95 | 74.12 | 6.32 |
| Experiment 3-1-Plate2-0172 | Lumidox 1 | 6.47 | 72.68 | 6.55 |
| Experiment 3-1-Plate2-0173 | Lumidox 1 | 6.76 | 71.98 | 6.84 |
| Experiment 3-1-Plate2-0174 | Lumidox 1 | 6.64 | 73.33 | 6.67 |
| Experiment 3-1-Plate2-0175 | Lumidox 1 | 7.42 | 70.04 | 7.43 |
| Experiment 3-1-Plate2-0176 | Lumidox 1 | 7.23 | 71.22 | 6.86 |
| Experiment 3-1-Plate2-0177 | Lumidox 1 | 7.13 | 70.79 | 6.85 |
| Experiment 3-1-Plate2-0178 | Lumidox 1 | 7.48 | 71.15 | 6.82 |
| Experiment 3-1-Plate2-0179 | Lumidox 1 | 6.87 | 71.91 | 6.87 |
| Experiment 3-1-Plate2-0180 | Lumidox 1 | 7.32 | 71.42 | 6.87 |
| Experiment 3-1-Plate2-0181 | Lumidox 1 | 4.98 | 76.42 | 5.46 |
| Experiment 3-1-Plate2-0182 | Lumidox 1 | 5.44 | 74.56 | 5.67 |
| Experiment 3-1-Plate2-0183 | Lumidox 1 | 5.64 | 74.55 | 5.91 |
| Experiment 3-1-Plate2-0184 | Lumidox 1 | 5.86 | 73.53 | 6.13 |
| Experiment 3-1-Plate2-0185 | Lumidox 1 | 5.85 | 74.38 | 6.29 |
| Experiment 3-1-Plate2-0186 | Lumidox 1 | 6.14 | 74.35 | 6.42 |
| Experiment 3-1-Plate2-0187 | Lumidox 1 | 6.13 | 74.03 | 6.50 |
| Experiment 3-1-Plate2-0188 | Lumidox 1 | 6.63 | 72.63 | 6.84 |
| Experiment 3-1-Plate2-0189 | Lumidox 1 | 6.96 | 71.69 | 6.97 |
| Experiment 3-1-Plate2-0190 | Lumidox 1 | 6.38 | 73.16 | 6.65 |
| Experiment 3-1-Plate2-0191 | Lumidox 1 | 6.55 | 73.00 | 6.81 |
| Experiment 3-1-Plate2-0192 | Lumidox 1 | 6.46 | 73.65 | 6.63 |
| Experiment 3-1-Plate2-0193 | Lumidox 1 | 6.32 | 73.42 | 6.38 |
| Experiment 3-1-Plate2-0194 | Lumidox 1 | 6.05 | 73.86 | 6.15 |
| Experiment 3-1-Plate2-0195 | Lumidox 1 | 6.31 | 72.78 | 6.47 |
| Experiment 3-1-Plate2-0196 | Lumidox 1 | 6.20 | 74.00 | 6.36 |
| Experiment 3-1-Plate2-0197 | Lumidox 1 | 6.24 | 73.41 | 6.43 |
| Experiment 3-1-Plate2-0198 | Lumidox 1 | 6.36 | 73.50 | 6.56 |
| Experiment 3-1-Plate2-0199 | Lumidox 1 | 6.06 | 73.70 | 6.33 |



|                            |           |      |       |      |
|----------------------------|-----------|------|-------|------|
| Experiment 3-1-Plate2-0200 | Lumidox 1 | 6.18 | 73.29 | 6.40 |
| Experiment 3-1-Plate2-0201 | Lumidox 1 | 6.18 | 73.91 | 6.45 |
| Experiment 3-1-Plate2-0202 | Lumidox 1 | 6.02 | 74.05 | 6.12 |
| Experiment 3-1-Plate2-0203 | Lumidox 1 | 5.42 | 74.74 | 6.01 |
| Experiment 3-1-Plate2-0204 | Lumidox 1 | 5.44 | 74.72 | 5.69 |
| Experiment 3-1-Plate2-0205 | Lumidox 1 | 7.20 | 71.15 | 7.09 |
| Experiment 3-1-Plate2-0206 | Lumidox 1 | 7.11 | 70.90 | 7.24 |
| Experiment 3-1-Plate2-0207 | Lumidox 1 | 7.14 | 71.12 | 7.09 |
| Experiment 3-1-Plate2-0208 | Lumidox 1 | 6.99 | 71.84 | 6.97 |
| Experiment 3-1-Plate2-0209 | Lumidox 1 | 6.62 | 72.45 | 6.85 |
| Experiment 3-1-Plate2-0210 | Lumidox 1 | 6.83 | 71.74 | 6.95 |
| Experiment 3-1-Plate2-0211 | Lumidox 1 | 6.60 | 73.40 | 6.49 |
| Experiment 3-1-Plate2-0212 | Lumidox 1 | 6.50 | 72.21 | 6.62 |
| Experiment 3-1-Plate2-0213 | Lumidox 1 | 6.49 | 73.78 | 6.61 |
| Experiment 3-1-Plate2-0214 | Lumidox 1 | 6.34 | 73.17 | 6.44 |
| Experiment 3-1-Plate2-0215 | Lumidox 1 | 6.18 | 74.11 | 6.24 |
| Experiment 3-1-Plate2-0216 | Lumidox 1 | 6.15 | 72.71 | 6.28 |
| Experiment 3-1-Plate2-0217 | Lumidox 1 | 7.72 | 69.87 | 7.50 |
| Experiment 3-1-Plate2-0218 | Lumidox 1 | 7.59 | 70.14 | 6.89 |
| Experiment 3-1-Plate2-0219 | Lumidox 1 | 7.67 | 69.86 | 6.95 |
| Experiment 3-1-Plate2-0220 | Lumidox 1 | 7.64 | 69.61 | 7.41 |
| Experiment 3-1-Plate2-0221 | Lumidox 1 | 7.15 | 71.13 | 7.16 |
| Experiment 3-1-Plate2-0222 | Lumidox 1 | 7.54 | 70.19 | 7.35 |
| Experiment 3-1-Plate2-0223 | Lumidox 1 | 7.18 | 71.11 | 7.10 |
| Experiment 3-1-Plate2-0224 | Lumidox 1 | 7.01 | 72.23 | 7.05 |
| Experiment 3-1-Plate2-0225 | Lumidox 1 | 7.02 | 71.50 | 7.04 |
| Experiment 3-1-Plate2-0226 | Lumidox 1 | 6.71 | 71.89 | 6.83 |
| Experiment 3-1-Plate2-0227 | Lumidox 1 | 6.39 | 72.47 | 6.52 |
| Experiment 3-1-Plate2-0228 | Lumidox 1 | 5.72 | 73.29 | 5.97 |
| Experiment 3-1-Plate2-0229 | Lumidox 1 | 8.20 | 68.37 | 7.57 |
| Experiment 3-1-Plate2-0230 | Lumidox 1 | 8.03 | 68.92 | 7.75 |
| Experiment 3-1-Plate2-0231 | Lumidox 1 | 8.07 | 68.76 | 7.68 |
| Experiment 3-1-Plate2-0232 | Lumidox 1 | 7.89 | 69.57 | 7.59 |
| Experiment 3-1-Plate2-0233 | Lumidox 1 | 7.74 | 69.71 | 7.63 |
| Experiment 3-1-Plate2-0234 | Lumidox 1 | 7.29 | 70.89 | 7.39 |
| Experiment 3-1-Plate2-0235 | Lumidox 1 | 7.02 | 71.07 | 7.17 |
| Experiment 3-1-Plate2-0236 | Lumidox 1 | 7.49 | 70.26 | 7.34 |
| Experiment 3-1-Plate2-0237 | Lumidox 1 | 7.49 | 70.05 | 7.27 |
| Experiment 3-1-Plate2-0238 | Lumidox 1 | 7.13 | 70.86 | 6.92 |
| Experiment 3-1-Plate2-0239 | Lumidox 1 | 6.74 | 72.15 | 6.68 |
| Experiment 3-1-Plate2-0240 | Lumidox 1 | 6.34 | 72.34 | 6.63 |
| Experiment 3-1-Plate2-0241 | Lumidox 1 | 8.86 | 67.33 | 7.54 |
| Experiment 3-1-Plate2-0242 | Lumidox 1 | 8.39 | 68.20 | 7.42 |
| Experiment 3-1-Plate2-0243 | Lumidox 1 | 8.72 | 67.81 | 7.78 |
| Experiment 3-1-Plate2-0244 | Lumidox 1 | 8.20 | 68.41 | 7.85 |
| Experiment 3-1-Plate2-0245 | Lumidox 1 | 8.10 | 69.69 | 7.43 |
| Experiment 3-1-Plate2-0246 | Lumidox 1 | 7.76 | 70.43 | 7.62 |
| Experiment 3-1-Plate2-0247 | Lumidox 1 | 7.29 | 70.83 | 7.34 |
| Experiment 3-1-Plate2-0248 | Lumidox 1 | 7.85 | 69.76 | 7.53 |
| Experiment 3-1-Plate2-0249 | Lumidox 1 | 7.72 | 69.56 | 7.35 |
| Experiment 3-1-Plate2-0250 | Lumidox 1 | 7.70 | 70.13 | 6.80 |
| Experiment 3-1-Plate2-0251 | Lumidox 1 | 7.22 | 70.54 | 6.75 |
| Experiment 3-1-Plate2-0252 | Lumidox 1 | 6.44 | 71.81 | 6.21 |
| Experiment 3-1-Plate2-0253 | Lumidox 1 | 8.70 | 66.92 | 7.93 |
| Experiment 3-1-Plate2-0254 | Lumidox 1 | 8.40 | 67.61 | 8.07 |
| Experiment 3-1-Plate2-0255 | Lumidox 1 | 8.78 | 67.54 | 7.82 |
| Experiment 3-1-Plate2-0256 | Lumidox 1 | 8.36 | 68.39 | 8.12 |
| Experiment 3-1-Plate2-0257 | Lumidox 1 | 8.42 | 68.28 | 7.97 |
| Experiment 3-1-Plate2-0258 | Lumidox 1 | 8.64 | 67.57 | 8.25 |
| Experiment 3-1-Plate2-0259 | Lumidox 1 | 8.46 | 68.51 | 7.62 |
| Experiment 3-1-Plate2-0260 | Lumidox 1 | 8.07 | 69.64 | 7.41 |
| Experiment 3-1-Plate2-0261 | Lumidox 1 | 7.96 | 68.77 | 7.57 |
| Experiment 3-1-Plate2-0262 | Lumidox 1 | 8.09 | 69.09 | 6.69 |
| Experiment 3-1-Plate2-0263 | Lumidox 1 | 7.71 | 69.89 | 6.43 |
| Experiment 3-1-Plate2-0264 | Lumidox 1 | 6.80 | 71.90 | 6.13 |
| Experiment 3-1-Plate2-0265 | Lumidox 1 | 8.58 | 67.57 | 8.14 |
| Experiment 3-1-Plate2-0266 | Lumidox 1 | 8.65 | 66.97 | 8.19 |
| Experiment 3-1-Plate2-0267 | Lumidox 1 | 8.51 | 68.27 | 8.05 |
| Experiment 3-1-Plate2-0268 | Lumidox 1 | 8.66 | 67.99 | 8.17 |
| Experiment 3-1-Plate2-0269 | Lumidox 1 | 8.01 | 69.86 | 7.95 |
| Experiment 3-1-Plate2-0270 | Lumidox 1 | 8.27 | 68.71 | 7.94 |
| Experiment 3-1-Plate2-0271 | Lumidox 1 | 8.34 | 68.55 | 7.99 |
| Experiment 3-1-Plate2-0272 | Lumidox 1 | 8.49 | 67.17 | 8.21 |

|                            |           |      |       |      |
|----------------------------|-----------|------|-------|------|
| Experiment 3-1-Plate2-0273 | Lumidox 1 | 8.07 | 68.86 | 7.43 |
| Experiment 3-1-Plate2-0274 | Lumidox 1 | 7.77 | 69.52 | 6.81 |
| Experiment 3-1-Plate2-0275 | Lumidox 1 | 7.45 | 70.89 | 6.62 |
| Experiment 3-1-Plate2-0276 | Lumidox 1 | 6.51 | 72.71 | 5.74 |
| Experiment 3-1-Plate2-0277 | Lumidox 1 | 8.59 | 67.57 | 8.38 |
| Experiment 3-1-Plate2-0278 | Lumidox 1 | 8.47 | 68.39 | 8.12 |
| Experiment 3-1-Plate2-0279 | Lumidox 1 | 8.48 | 68.63 | 8.30 |
| Experiment 3-1-Plate2-0280 | Lumidox 1 | 8.46 | 68.35 | 8.33 |
| Experiment 3-1-Plate2-0281 | Lumidox 1 | 8.33 | 68.56 | 8.05 |
| Experiment 3-1-Plate2-0282 | Lumidox 1 | 8.45 | 68.43 | 8.21 |
| Experiment 3-1-Plate2-0283 | Lumidox 1 | 8.09 | 69.25 | 7.80 |
| Experiment 3-1-Plate2-0284 | Lumidox 1 | 8.01 | 70.40 | 7.79 |
| Experiment 3-1-Plate2-0285 | Lumidox 1 | 8.16 | 68.39 | 7.41 |
| Experiment 3-1-Plate2-0286 | Lumidox 1 | 8.01 | 69.40 | 7.21 |
| Experiment 3-1-Plate2-0287 | Lumidox 1 | 7.09 | 70.65 | 6.95 |
| Experiment 3-1-Plate2-0288 | Lumidox 1 | 6.33 | 73.45 | 5.60 |
| Experiment 3-1-Plate2-0289 | Lumidox 1 | 8.93 | 66.76 | 8.01 |
| Experiment 3-1-Plate2-0290 | Lumidox 1 | 8.85 | 67.95 | 7.99 |
| Experiment 3-1-Plate2-0291 | Lumidox 1 | 8.66 | 68.29 | 8.07 |
| Experiment 3-1-Plate2-0292 | Lumidox 1 | 8.68 | 67.65 | 8.35 |
| Experiment 3-1-Plate2-0293 | Lumidox 1 | 8.12 | 69.98 | 7.30 |
| Experiment 3-1-Plate2-0294 | Lumidox 1 | 8.25 | 69.01 | 7.99 |
| Experiment 3-1-Plate2-0295 | Lumidox 1 | 7.85 | 70.36 | 7.40 |
| Experiment 3-1-Plate2-0296 | Lumidox 1 | 8.03 | 69.35 | 7.72 |
| Experiment 3-1-Plate2-0297 | Lumidox 1 | 8.30 | 69.65 | 7.51 |
| Experiment 3-1-Plate2-0298 | Lumidox 1 | 8.15 | 68.90 | 7.28 |
| Experiment 3-1-Plate2-0299 | Lumidox 1 | 7.37 | 70.56 | 6.55 |
| Experiment 3-1-Plate2-0300 | Lumidox 1 | 6.32 | 73.17 | 5.66 |
| Experiment 3-1-Plate2-0301 | Lumidox 1 | 8.62 | 67.93 | 8.25 |
| Experiment 3-1-Plate2-0302 | Lumidox 1 | 8.69 | 67.67 | 8.27 |
| Experiment 3-1-Plate2-0303 | Lumidox 1 | 8.72 | 67.61 | 8.36 |
| Experiment 3-1-Plate2-0304 | Lumidox 1 | 8.52 | 68.16 | 8.22 |
| Experiment 3-1-Plate2-0305 | Lumidox 1 | 8.32 | 68.37 | 8.09 |
| Experiment 3-1-Plate2-0306 | Lumidox 1 | 8.22 | 68.85 | 8.16 |
| Experiment 3-1-Plate2-0307 | Lumidox 1 | 8.37 | 69.17 | 7.94 |
| Experiment 3-1-Plate2-0308 | Lumidox 1 | 7.99 | 69.70 | 7.87 |
| Experiment 3-1-Plate2-0309 | Lumidox 1 | 8.52 | 67.32 | 8.06 |
| Experiment 3-1-Plate2-0310 | Lumidox 1 | 8.57 | 67.57 | 7.28 |
| Experiment 3-1-Plate2-0311 | Lumidox 1 | 7.48 | 71.67 | 6.40 |
| Experiment 3-1-Plate2-0312 | Lumidox 1 | 6.87 | 72.11 | 5.94 |
| Experiment 3-1-Plate2-0313 | Lumidox 1 | 8.68 | 67.83 | 8.28 |
| Experiment 3-1-Plate2-0314 | Lumidox 1 | 8.58 | 67.95 | 8.21 |
| Experiment 3-1-Plate2-0315 | Lumidox 1 | 9.43 | 65.44 | 8.57 |
| Experiment 3-1-Plate2-0316 | Lumidox 1 | 8.48 | 68.17 | 8.25 |
| Experiment 3-1-Plate2-0317 | Lumidox 1 | 8.60 | 67.78 | 8.03 |
| Experiment 3-1-Plate2-0318 | Lumidox 1 | 8.24 | 69.01 | 8.24 |
| Experiment 3-1-Plate2-0319 | Lumidox 1 | 8.39 | 69.01 | 7.96 |
| Experiment 3-1-Plate2-0320 | Lumidox 1 | 8.29 | 68.12 | 8.07 |
| Experiment 3-1-Plate2-0321 | Lumidox 1 | 7.63 | 70.04 | 7.64 |
| Experiment 3-1-Plate2-0322 | Lumidox 1 | 7.43 | 71.11 | 6.66 |
| Experiment 3-1-Plate2-0323 | Lumidox 1 | 7.62 | 69.73 | 6.82 |
| Experiment 3-1-Plate2-0324 | Lumidox 1 | 7.36 | 70.66 | 6.13 |
| Experiment 3-1-Plate2-0325 | Lumidox 1 | 7.06 | 71.90 | 7.45 |
| Experiment 3-1-Plate2-0326 | Lumidox 1 | 8.56 | 67.58 | 8.24 |
| Experiment 3-1-Plate2-0327 | Lumidox 1 | 8.29 | 68.72 | 7.96 |
| Experiment 3-1-Plate2-0328 | Lumidox 1 | 9.16 | 67.05 | 8.17 |
| Experiment 3-1-Plate2-0329 | Lumidox 1 | 8.24 | 69.09 | 8.03 |
| Experiment 3-1-Plate2-0330 | Lumidox 1 | 8.14 | 69.10 | 8.02 |
| Experiment 3-1-Plate2-0331 | Lumidox 1 | 8.28 | 69.09 | 7.79 |
| Experiment 3-1-Plate2-0332 | Lumidox 1 | 8.25 | 68.24 | 7.98 |
| Experiment 3-1-Plate2-0333 | Lumidox 1 | 7.95 | 69.37 | 7.77 |
| Experiment 3-1-Plate2-0334 | Lumidox 1 | 8.04 | 69.46 | 7.12 |
| Experiment 3-1-Plate2-0335 | Lumidox 1 | 7.52 | 70.31 | 6.39 |
| Experiment 3-1-Plate2-0336 | Lumidox 1 | 6.98 | 71.61 | 6.05 |
| Experiment 3-1-Plate2-0337 | Lumidox 1 | 7.50 | 72.80 | 6.99 |
| Experiment 3-1-Plate2-0338 | Lumidox 1 | 7.54 | 72.95 | 6.59 |
| Experiment 3-1-Plate2-0339 | Lumidox 1 | 8.07 | 69.38 | 7.54 |
| Experiment 3-1-Plate2-0340 | Lumidox 1 | 8.54 | 67.25 | 8.30 |
| Experiment 3-1-Plate2-0341 | Lumidox 1 | 8.18 | 68.82 | 7.74 |
| Experiment 3-1-Plate2-0342 | Lumidox 1 | 8.47 | 68.06 | 7.74 |
| Experiment 3-1-Plate2-0343 | Lumidox 1 | 8.20 | 68.44 | 7.94 |
| Experiment 3-1-Plate2-0344 | Lumidox 1 | 7.91 | 69.95 | 7.60 |
| Experiment 3-1-Plate2-0345 | Lumidox 1 | 7.48 | 70.49 | 7.23 |

|                            |                        |       |       |       |
|----------------------------|------------------------|-------|-------|-------|
| Experiment 3-1-Plate2-0346 | Lumidox 1              | 7.00  | 71.19 | 7.15  |
| Experiment 3-1-Plate2-0347 | Lumidox 1              | 6.71  | 72.00 | 6.89  |
| Experiment 3-1-Plate2-0348 | Lumidox 1              | 6.47  | 72.06 | 6.52  |
| Experiment 3-1-Plate2-0349 | Lumidox 1              | 7.92  | 71.36 | 7.40  |
| Experiment 3-1-Plate2-0350 | Lumidox 1              | 7.48  | 70.48 | 7.04  |
| Experiment 3-1-Plate2-0351 | Lumidox 1              | 7.88  | 69.87 | 7.81  |
| Experiment 3-1-Plate2-0352 | Lumidox 1              | 7.81  | 69.32 | 7.47  |
| Experiment 3-1-Plate2-0353 | Lumidox 1              | 7.61  | 70.24 | 7.42  |
| Experiment 3-1-Plate2-0354 | Lumidox 1              | 7.78  | 70.11 | 7.58  |
| Experiment 3-1-Plate2-0355 | Lumidox 1              | 7.77  | 69.56 | 7.60  |
| Experiment 3-1-Plate2-0356 | Lumidox 1              | 7.44  | 70.70 | 7.24  |
| Experiment 3-1-Plate2-0357 | Lumidox 1              | 7.28  | 70.43 | 7.39  |
| Experiment 3-1-Plate2-0358 | Lumidox 1              | 6.85  | 71.17 | 6.90  |
| Experiment 3-1-Plate2-0359 | Lumidox 1              | 6.51  | 72.29 | 6.61  |
| Experiment 3-1-Plate2-0360 | Lumidox 1              | 6.14  | 71.97 | 6.39  |
| Experiment 3-1-Plate2-0361 | Lumidox 1              | 6.97  | 71.30 | 6.74  |
| Experiment 3-1-Plate2-0362 | Lumidox 1              | 7.02  | 71.85 | 7.05  |
| Experiment 3-1-Plate2-0363 | Lumidox 1              | 7.66  | 69.98 | 7.12  |
| Experiment 3-1-Plate2-0364 | Lumidox 1              | 7.96  | 68.66 | 7.23  |
| Experiment 3-1-Plate2-0365 | Lumidox 1              | 7.27  | 71.27 | 7.27  |
| Experiment 3-1-Plate2-0366 | Lumidox 1              | 7.09  | 71.18 | 7.13  |
| Experiment 3-1-Plate2-0367 | Lumidox 1              | 7.05  | 71.61 | 7.12  |
| Experiment 3-1-Plate2-0368 | Lumidox 1              | 6.89  | 72.21 | 6.88  |
| Experiment 3-1-Plate2-0369 | Lumidox 1              | 6.72  | 72.02 | 7.09  |
| Experiment 3-1-Plate2-0370 | Lumidox 1              | 6.58  | 72.29 | 6.62  |
| Experiment 3-1-Plate2-0371 | Lumidox 1              | 6.37  | 71.76 | 6.59  |
| Experiment 3-1-Plate2-0372 | Lumidox 1              | 6.12  | 71.75 | 6.40  |
| Experiment 3-1-Plate2-0373 | Lumidox 1              | 6.31  | 73.17 | 6.48  |
| Experiment 3-1-Plate2-0374 | Lumidox 1              | 6.13  | 73.57 | 6.40  |
| Experiment 3-1-Plate2-0375 | Lumidox 1              | 7.02  | 71.22 | 6.92  |
| Experiment 3-1-Plate2-0376 | Lumidox 1              | 6.85  | 72.32 | 6.97  |
| Experiment 3-1-Plate2-0377 | Lumidox 1              | 6.75  | 72.49 | 6.82  |
| Experiment 3-1-Plate2-0378 | Lumidox 1              | 6.64  | 72.72 | 6.69  |
| Experiment 3-1-Plate2-0379 | Lumidox 1              | 6.39  | 72.62 | 6.73  |
| Experiment 3-1-Plate2-0380 | Lumidox 1              | 6.81  | 71.79 | 6.73  |
| Experiment 3-1-Plate2-0381 | Lumidox 1              | 5.97  | 74.79 | 6.12  |
| Experiment 3-1-Plate2-0382 | Lumidox 1              | 6.42  | 72.19 | 6.57  |
| Experiment 3-1-Plate2-0383 | Lumidox 1              | 5.51  | 75.10 | 5.57  |
| Experiment 3-1-Plate2-0384 | Lumidox 1              | 5.50  | 74.95 | 5.80  |
| Experiment 3-1-Plate3-0001 | Efficiency Aggregators | 19.82 | 42.68 | 17.09 |
| Experiment 3-1-Plate3-0002 | Efficiency Aggregators | 19.96 | 42.62 | 17.29 |
| Experiment 3-1-Plate3-0003 | Efficiency Aggregators | 19.58 | 43.59 | 16.98 |
| Experiment 3-1-Plate3-0004 | Efficiency Aggregators | 18.92 | 44.12 | 16.85 |
| Experiment 3-1-Plate3-0005 | Efficiency Aggregators | 20.63 | 41.92 | 18.38 |
| Experiment 3-1-Plate3-0006 | Efficiency Aggregators | 19.15 | 43.61 | 16.82 |
| Experiment 3-1-Plate3-0007 | Efficiency Aggregators | 19.05 | 43.88 | 16.89 |
| Experiment 3-1-Plate3-0008 | Efficiency Aggregators | 18.61 | 44.14 | 16.74 |
| Experiment 3-1-Plate3-0009 | Efficiency Aggregators | 18.74 | 44.03 | 16.70 |
| Experiment 3-1-Plate3-0010 | Efficiency Aggregators | 18.80 | 43.55 | 17.09 |
| Experiment 3-1-Plate3-0011 | Efficiency Aggregators | 18.89 | 43.29 | 16.95 |
| Experiment 3-1-Plate3-0012 | Efficiency Aggregators | 20.22 | 41.19 | 17.77 |
| Experiment 3-1-Plate3-0013 | Efficiency Aggregators | 18.68 | 43.76 | 17.03 |
| Experiment 3-1-Plate3-0014 | Efficiency Aggregators | 18.89 | 44.44 | 16.78 |
| Experiment 3-1-Plate3-0015 | Efficiency Aggregators | 18.64 | 44.68 | 16.64 |
| Experiment 3-1-Plate3-0016 | Efficiency Aggregators | 19.29 | 42.96 | 17.55 |
| Experiment 3-1-Plate3-0017 | Efficiency Aggregators | 18.51 | 44.38 | 16.78 |
| Experiment 3-1-Plate3-0018 | Efficiency Aggregators | 19.77 | 42.63 | 17.28 |
| Experiment 3-1-Plate3-0019 | Efficiency Aggregators | 18.00 | 44.99 | 16.36 |
| Experiment 3-1-Plate3-0020 | Efficiency Aggregators | 18.10 | 44.95 | 16.32 |
| Experiment 3-1-Plate3-0021 | Efficiency Aggregators | 17.42 | 45.71 | 16.23 |
| Experiment 3-1-Plate3-0022 | Efficiency Aggregators | 17.65 | 45.13 | 16.55 |
| Experiment 3-1-Plate3-0023 | Efficiency Aggregators | 17.48 | 45.83 | 16.14 |
| Experiment 3-1-Plate3-0024 | Efficiency Aggregators | 17.29 | 45.61 | 16.32 |
| Experiment 3-1-Plate3-0025 | Efficiency Aggregators | 18.51 | 44.35 | 17.05 |
| Experiment 3-1-Plate3-0026 | Efficiency Aggregators | 18.37 | 45.14 | 16.50 |
| Experiment 3-1-Plate3-0027 | Efficiency Aggregators | 18.10 | 45.60 | 16.50 |
| Experiment 3-1-Plate3-0028 | Efficiency Aggregators | 20.70 | 41.54 | 17.82 |
| Experiment 3-1-Plate3-0029 | Efficiency Aggregators | 17.85 | 45.47 | 16.28 |
| Experiment 3-1-Plate3-0030 | Efficiency Aggregators | 18.42 | 44.77 | 16.61 |
| Experiment 3-1-Plate3-0031 | Efficiency Aggregators | 20.27 | 40.70 | 17.30 |
| Experiment 3-1-Plate3-0032 | Efficiency Aggregators | 20.80 | 40.70 | 17.85 |
| Experiment 3-1-Plate3-0033 | Efficiency Aggregators | 18.63 | 44.28 | 16.70 |
| Experiment 3-1-Plate3-0034 | Efficiency Aggregators | 17.20 | 45.48 | 16.62 |

|                            |                        |       |       |       |
|----------------------------|------------------------|-------|-------|-------|
| Experiment 3-1-Plate3-0035 | Efficiency Aggregators | 19.12 | 43.01 | 17.00 |
| Experiment 3-1-Plate3-0036 | Efficiency Aggregators | 17.83 | 45.35 | 16.18 |
| Experiment 3-1-Plate3-0037 | Efficiency Aggregators | 18.31 | 45.00 | 16.66 |
| Experiment 3-1-Plate3-0038 | Efficiency Aggregators | 17.84 | 46.02 | 16.37 |
| Experiment 3-1-Plate3-0039 | Efficiency Aggregators | 18.08 | 45.49 | 16.39 |
| Experiment 3-1-Plate3-0040 | Efficiency Aggregators | 18.91 | 44.21 | 16.88 |
| Experiment 3-1-Plate3-0041 | Efficiency Aggregators | 17.96 | 45.79 | 16.34 |
| Experiment 3-1-Plate3-0042 | Efficiency Aggregators | 17.79 | 45.81 | 16.43 |
| Experiment 3-1-Plate3-0043 | Efficiency Aggregators | 17.68 | 45.63 | 16.32 |
| Experiment 3-1-Plate3-0044 | Efficiency Aggregators | 17.55 | 46.02 | 16.07 |
| Experiment 3-1-Plate3-0045 | Efficiency Aggregators | 17.99 | 44.97 | 16.29 |
| Experiment 3-1-Plate3-0046 | Efficiency Aggregators | 17.50 | 45.54 | 15.53 |
| Experiment 3-1-Plate3-0047 | Efficiency Aggregators | 17.62 | 45.56 | 15.99 |
| Experiment 3-1-Plate3-0048 | Efficiency Aggregators | 16.96 | 46.43 | 15.94 |
| Experiment 3-1-Plate3-0049 | Efficiency Aggregators | 18.10 | 44.18 | 16.72 |
| Experiment 3-1-Plate3-0050 | Efficiency Aggregators | 17.83 | 46.54 | 15.86 |
| Experiment 3-1-Plate3-0051 | Efficiency Aggregators | 17.49 | 45.96 | 15.96 |
| Experiment 3-1-Plate3-0052 | Efficiency Aggregators | 17.93 | 45.74 | 16.28 |
| Experiment 3-1-Plate3-0053 | Efficiency Aggregators | 19.12 | 43.32 | 17.25 |
| Experiment 3-1-Plate3-0054 | Efficiency Aggregators | 17.59 | 46.06 | 16.15 |
| Experiment 3-1-Plate3-0055 | Efficiency Aggregators | 17.47 | 45.53 | 16.55 |
| Experiment 3-1-Plate3-0056 | Efficiency Aggregators | 17.35 | 46.15 | 16.04 |
| Experiment 3-1-Plate3-0057 | Efficiency Aggregators | 17.70 | 45.33 | 15.38 |
| Experiment 3-1-Plate3-0058 | Efficiency Aggregators | 17.40 | 46.73 | 15.87 |
| Experiment 3-1-Plate3-0059 | Efficiency Aggregators | 17.44 | 45.94 | 14.91 |
| Experiment 3-1-Plate3-0060 | Efficiency Aggregators | 16.79 | 47.11 | 15.68 |
| Experiment 3-1-Plate3-0061 | Efficiency Aggregators | 17.97 | 45.67 | 16.39 |
| Experiment 3-1-Plate3-0062 | Efficiency Aggregators | 20.58 | 41.44 | 17.44 |
| Experiment 3-1-Plate3-0063 | Efficiency Aggregators | 19.12 | 42.96 | 16.72 |
| Experiment 3-1-Plate3-0064 | Efficiency Aggregators | 18.63 | 44.37 | 15.92 |
| Experiment 3-1-Plate3-0065 | Efficiency Aggregators | 18.21 | 44.64 | 16.75 |
| Experiment 3-1-Plate3-0066 | Efficiency Aggregators | 17.94 | 45.56 | 16.41 |
| Experiment 3-1-Plate3-0067 | Efficiency Aggregators | 18.30 | 44.86 | 16.28 |
| Experiment 3-1-Plate3-0068 | Efficiency Aggregators | 17.11 | 46.61 | 16.20 |
| Experiment 3-1-Plate3-0069 | Efficiency Aggregators | 17.69 | 45.39 | 16.37 |
| Experiment 3-1-Plate3-0070 | Efficiency Aggregators | 19.83 | 42.55 | 17.22 |
| Experiment 3-1-Plate3-0071 | Efficiency Aggregators | 16.83 | 46.99 | 15.69 |
| Experiment 3-1-Plate3-0072 | Efficiency Aggregators | 16.77 | 47.58 | 15.56 |
| Experiment 3-1-Plate3-0073 | Efficiency Aggregators | 18.11 | 44.98 | 16.37 |
| Experiment 3-1-Plate3-0074 | Efficiency Aggregators | 18.87 | 44.98 | 14.89 |
| Experiment 3-1-Plate3-0075 | Efficiency Aggregators | 19.30 | 44.45 | 14.42 |
| Experiment 3-1-Plate3-0076 | Efficiency Aggregators | 19.18 | 43.84 | 16.13 |
| Experiment 3-1-Plate3-0077 | Efficiency Aggregators | 20.53 | 43.27 | 15.02 |
| Experiment 3-1-Plate3-0078 | Efficiency Aggregators | 16.86 | 46.58 | 16.04 |
| Experiment 3-1-Plate3-0079 | Efficiency Aggregators | 17.05 | 47.29 | 15.69 |
| Experiment 3-1-Plate3-0080 | Efficiency Aggregators | 16.80 | 46.89 | 16.36 |
| Experiment 3-1-Plate3-0081 | Efficiency Aggregators | 17.32 | 46.08 | 16.27 |
| Experiment 3-1-Plate3-0082 | Efficiency Aggregators | 16.82 | 47.24 | 15.74 |
| Experiment 3-1-Plate3-0083 | Efficiency Aggregators | 16.82 | 47.16 | 15.51 |
| Experiment 3-1-Plate3-0084 | Efficiency Aggregators | 16.83 | 47.05 | 15.85 |
| Experiment 3-1-Plate3-0085 | Efficiency Aggregators | 17.96 | 45.60 | 16.34 |
| Experiment 3-1-Plate3-0086 | Efficiency Aggregators | 19.43 | 44.40 | 14.27 |
| Experiment 3-1-Plate3-0087 | Efficiency Aggregators | 19.51 | 44.22 | 14.47 |
| Experiment 3-1-Plate3-0088 | Efficiency Aggregators | 18.57 | 44.67 | 16.49 |
| Experiment 3-1-Plate3-0089 | Efficiency Aggregators | 17.11 | 47.05 | 15.63 |
| Experiment 3-1-Plate3-0090 | Efficiency Aggregators | 17.88 | 45.30 | 16.51 |
| Experiment 3-1-Plate3-0091 | Efficiency Aggregators | 16.87 | 47.06 | 15.99 |
| Experiment 3-1-Plate3-0092 | Efficiency Aggregators | 16.89 | 47.43 | 15.59 |
| Experiment 3-1-Plate3-0093 | Efficiency Aggregators | 17.05 | 46.98 | 15.97 |
| Experiment 3-1-Plate3-0094 | Efficiency Aggregators | 16.91 | 47.02 | 15.83 |
| Experiment 3-1-Plate3-0095 | Efficiency Aggregators | 16.78 | 47.14 | 15.69 |
| Experiment 3-1-Plate3-0096 | Efficiency Aggregators | 17.09 | 46.41 | 15.80 |
| Experiment 3-1-Plate3-0097 | Efficiency Aggregators | 19.01 | 43.99 | 15.30 |
| Experiment 3-1-Plate3-0098 | Efficiency Aggregators | 19.05 | 44.71 | 14.79 |
| Experiment 3-1-Plate3-0099 | Efficiency Aggregators | 18.90 | 44.75 | 15.08 |
| Experiment 3-1-Plate3-0100 | Efficiency Aggregators | 22.18 | 40.11 | 16.05 |
| Experiment 3-1-Plate3-0101 | Efficiency Aggregators | 18.06 | 46.01 | 14.62 |
| Experiment 3-1-Plate3-0102 | Efficiency Aggregators | 17.61 | 46.25 | 15.47 |
| Experiment 3-1-Plate3-0103 | Efficiency Aggregators | 18.07 | 46.02 | 14.65 |
| Experiment 3-1-Plate3-0104 | Efficiency Aggregators | 22.34 | 38.30 | 18.45 |
| Experiment 3-1-Plate3-0105 | Efficiency Aggregators | 17.59 | 45.12 | 16.41 |
| Experiment 3-1-Plate3-0106 | Efficiency Aggregators | 16.76 | 46.94 | 15.35 |
| Experiment 3-1-Plate3-0107 | Efficiency Aggregators | 16.56 | 47.32 | 15.80 |

|                            |                        |       |       |       |
|----------------------------|------------------------|-------|-------|-------|
| Experiment 3-1-Plate3-0108 | Efficiency Aggregators | 16.92 | 46.79 | 15.64 |
| Experiment 3-1-Plate3-0109 | Efficiency Aggregators | 17.42 | 46.23 | 16.20 |
| Experiment 3-1-Plate3-0110 | Efficiency Aggregators | 19.60 | 44.79 | 14.25 |
| Experiment 3-1-Plate3-0111 | Efficiency Aggregators | 18.92 | 45.33 | 13.81 |
| Experiment 3-1-Plate3-0112 | Efficiency Aggregators | 21.14 | 41.76 | 15.05 |
| Experiment 3-1-Plate3-0113 | Efficiency Aggregators | 16.91 | 46.81 | 15.65 |
| Experiment 3-1-Plate3-0114 | Efficiency Aggregators | 22.67 | 38.06 | 18.47 |
| Experiment 3-1-Plate3-0115 | Efficiency Aggregators | 16.85 | 47.08 | 15.70 |
| Experiment 3-1-Plate3-0116 | Efficiency Aggregators | 21.28 | 39.70 | 17.94 |
| Experiment 3-1-Plate3-0117 | Efficiency Aggregators | 16.41 | 47.70 | 15.45 |
| Experiment 3-1-Plate3-0118 | Efficiency Aggregators | 17.09 | 46.58 | 15.73 |
| Experiment 3-1-Plate3-0119 | Efficiency Aggregators | 16.59 | 47.38 | 15.83 |
| Experiment 3-1-Plate3-0120 | Efficiency Aggregators | 16.39 | 47.74 | 15.42 |
| Experiment 3-1-Plate3-0121 | Efficiency Aggregators | 18.11 | 45.00 | 15.97 |
| Experiment 3-1-Plate3-0122 | Efficiency Aggregators | 18.72 | 45.36 | 14.58 |
| Experiment 3-1-Plate3-0123 | Efficiency Aggregators | 18.79 | 45.21 | 14.32 |
| Experiment 3-1-Plate3-0124 | Efficiency Aggregators | 18.57 | 45.27 | 14.16 |
| Experiment 3-1-Plate3-0125 | Efficiency Aggregators | 16.59 | 47.58 | 15.50 |
| Experiment 3-1-Plate3-0126 | Efficiency Aggregators | 16.85 | 46.99 | 15.93 |
| Experiment 3-1-Plate3-0127 | Efficiency Aggregators | 16.86 | 47.72 | 15.66 |
| Experiment 3-1-Plate3-0128 | Efficiency Aggregators | 17.27 | 46.30 | 16.23 |
| Experiment 3-1-Plate3-0129 | Efficiency Aggregators | 17.07 | 46.87 | 15.59 |
| Experiment 3-1-Plate3-0130 | Efficiency Aggregators | 16.54 | 47.21 | 15.67 |
| Experiment 3-1-Plate3-0131 | Efficiency Aggregators | 16.93 | 47.17 | 15.64 |
| Experiment 3-1-Plate3-0132 | Efficiency Aggregators | 16.49 | 47.82 | 15.46 |
| Experiment 3-1-Plate3-0133 | Efficiency Aggregators | 18.41 | 44.76 | 16.17 |
| Experiment 3-1-Plate3-0134 | Efficiency Aggregators | 20.31 | 43.02 | 14.92 |
| Experiment 3-1-Plate3-0135 | Efficiency Aggregators | 16.93 | 47.59 | 15.60 |
| Experiment 3-1-Plate3-0136 | Efficiency Aggregators | 18.00 | 45.50 | 15.13 |
| Experiment 3-1-Plate3-0137 | Efficiency Aggregators | 17.75 | 46.42 | 15.26 |
| Experiment 3-1-Plate3-0138 | Efficiency Aggregators | 18.72 | 44.43 | 16.65 |
| Experiment 3-1-Plate3-0139 | Efficiency Aggregators | 16.10 | 47.64 | 16.24 |
| Experiment 3-1-Plate3-0140 | Efficiency Aggregators | 17.31 | 46.92 | 15.28 |
| Experiment 3-1-Plate3-0141 | Efficiency Aggregators | 21.43 | 39.53 | 17.45 |
| Experiment 3-1-Plate3-0142 | Efficiency Aggregators | 18.05 | 45.55 | 15.38 |
| Experiment 3-1-Plate3-0143 | Efficiency Aggregators | 17.19 | 46.77 | 15.71 |
| Experiment 3-1-Plate3-0144 | Efficiency Aggregators | 16.98 | 46.90 | 15.95 |
| Experiment 3-1-Plate3-0145 | Efficiency Aggregators | 17.34 | 46.72 | 16.13 |
| Experiment 3-1-Plate3-0146 | Efficiency Aggregators | 17.63 | 46.39 | 15.30 |
| Experiment 3-1-Plate3-0147 | Efficiency Aggregators | 17.35 | 46.71 | 16.00 |
| Experiment 3-1-Plate3-0148 | Efficiency Aggregators | 16.35 | 48.17 | 15.34 |
| Experiment 3-1-Plate3-0149 | Efficiency Aggregators | 16.72 | 47.93 | 15.62 |
| Experiment 3-1-Plate3-0150 | Efficiency Aggregators | 18.48 | 44.23 | 16.81 |
| Experiment 3-1-Plate3-0151 | Efficiency Aggregators | 21.06 | 40.53 | 17.04 |
| Experiment 3-1-Plate3-0152 | Efficiency Aggregators | 18.36 | 44.90 | 15.45 |
| Experiment 3-1-Plate3-0153 | Efficiency Aggregators | 16.97 | 46.84 | 15.87 |
| Experiment 3-1-Plate3-0154 | Efficiency Aggregators | 20.30 | 41.23 | 16.06 |
| Experiment 3-1-Plate3-0155 | Efficiency Aggregators | 16.51 | 47.64 | 15.09 |
| Experiment 3-1-Plate3-0156 | Efficiency Aggregators | 19.05 | 43.30 | 17.09 |
| Experiment 3-1-Plate3-0157 | Efficiency Aggregators | 17.50 | 46.51 | 16.60 |
| Experiment 3-1-Plate3-0158 | Efficiency Aggregators | 17.67 | 46.26 | 16.06 |
| Experiment 3-1-Plate3-0159 | Efficiency Aggregators | 17.27 | 47.26 | 15.80 |
| Experiment 3-1-Plate3-0160 | Efficiency Aggregators | 16.87 | 47.65 | 15.65 |
| Experiment 3-1-Plate3-0161 | Efficiency Aggregators | 18.29 | 44.61 | 16.73 |
| Experiment 3-1-Plate3-0162 | Efficiency Aggregators | 21.24 | 40.77 | 17.97 |
| Experiment 3-1-Plate3-0163 | Efficiency Aggregators | 16.49 | 47.48 | 15.83 |
| Experiment 3-1-Plate3-0164 | Efficiency Aggregators | 17.49 | 46.38 | 16.04 |
| Experiment 3-1-Plate3-0165 | Efficiency Aggregators | 17.18 | 46.26 | 15.95 |
| Experiment 3-1-Plate3-0166 | Efficiency Aggregators | 20.17 | 41.42 | 17.58 |
| Experiment 3-1-Plate3-0167 | Efficiency Aggregators | 30.27 | 25.06 | 22.55 |
| Experiment 3-1-Plate3-0168 | Efficiency Aggregators | 21.21 | 38.93 | 17.60 |
| Experiment 3-1-Plate3-0169 | Efficiency Aggregators | 17.49 | 47.26 | 15.84 |
| Experiment 3-1-Plate3-0170 | Efficiency Aggregators | 16.99 | 47.01 | 15.43 |
| Experiment 3-1-Plate3-0171 | Efficiency Aggregators | 16.80 | 48.04 | 15.48 |
| Experiment 3-1-Plate3-0172 | Efficiency Aggregators | 16.98 | 47.16 | 15.86 |
| Experiment 3-1-Plate3-0173 | Efficiency Aggregators | 16.37 | 47.73 | 15.74 |
| Experiment 3-1-Plate3-0174 | Efficiency Aggregators | 17.80 | 45.77 | 16.30 |
| Experiment 3-1-Plate3-0175 | Efficiency Aggregators | 16.59 | 47.92 | 15.44 |
| Experiment 3-1-Plate3-0176 | Efficiency Aggregators | 16.65 | 48.09 | 15.40 |
| Experiment 3-1-Plate3-0177 | Efficiency Aggregators | 17.33 | 46.36 | 16.15 |
| Experiment 3-1-Plate3-0178 | Efficiency Aggregators | 17.23 | 46.43 | 15.98 |
| Experiment 3-1-Plate3-0179 | Efficiency Aggregators | 19.77 | 42.61 | 16.33 |
| Experiment 3-1-Plate3-0180 | Efficiency Aggregators | 17.33 | 46.64 | 15.89 |

|                            |                        |       |       |       |
|----------------------------|------------------------|-------|-------|-------|
| Experiment 3-1-Plate3-0181 | Efficiency Aggregators | 17.60 | 46.38 | 15.82 |
| Experiment 3-1-Plate3-0182 | Efficiency Aggregators | 17.33 | 46.99 | 15.93 |
| Experiment 3-1-Plate3-0183 | Efficiency Aggregators | 16.98 | 47.14 | 15.75 |
| Experiment 3-1-Plate3-0184 | Efficiency Aggregators | 16.73 | 47.99 | 15.41 |
| Experiment 3-1-Plate3-0185 | Efficiency Aggregators | 16.96 | 47.71 | 15.74 |
| Experiment 3-1-Plate3-0186 | Efficiency Aggregators | 17.14 | 47.41 | 15.73 |
| Experiment 3-1-Plate3-0187 | Efficiency Aggregators | 16.90 | 47.06 | 15.70 |
| Experiment 3-1-Plate3-0188 | Efficiency Aggregators | 16.97 | 47.56 | 15.93 |
| Experiment 3-1-Plate3-0189 | Efficiency Aggregators | 17.57 | 45.90 | 16.23 |
| Experiment 3-1-Plate3-0190 | Efficiency Aggregators | 16.67 | 47.52 | 15.76 |
| Experiment 3-1-Plate3-0191 | Efficiency Aggregators | 17.18 | 46.64 | 15.93 |
| Experiment 3-1-Plate3-0192 | Efficiency Aggregators | 19.41 | 42.49 | 17.02 |
| Experiment 3-1-Plate3-0193 | Efficiency Aggregators | 19.96 | 42.33 | 17.63 |
| Experiment 3-1-Plate3-0194 | Efficiency Aggregators | 20.09 | 41.47 | 17.52 |
| Experiment 3-1-Plate3-0195 | Efficiency Aggregators | 20.00 | 42.34 | 17.30 |
| Experiment 3-1-Plate3-0196 | Efficiency Aggregators | 19.86 | 41.40 | 18.20 |
| Experiment 3-1-Plate3-0197 | Efficiency Aggregators | 19.51 | 42.17 | 17.42 |
| Experiment 3-1-Plate3-0198 | Efficiency Aggregators | 19.43 | 42.79 | 17.04 |
| Experiment 3-1-Plate3-0199 | Efficiency Aggregators | 18.71 | 43.90 | 16.80 |
| Experiment 3-1-Plate3-0200 | Efficiency Aggregators | 18.68 | 43.43 | 17.02 |
| Experiment 3-1-Plate3-0201 | Efficiency Aggregators | 18.95 | 43.45 | 16.82 |
| Experiment 3-1-Plate3-0202 | Efficiency Aggregators | 18.66 | 43.54 | 16.69 |
| Experiment 3-1-Plate3-0203 | Efficiency Aggregators | 18.40 | 44.62 | 16.56 |
| Experiment 3-1-Plate3-0204 | Efficiency Aggregators | 18.00 | 44.44 | 16.28 |
| Experiment 3-1-Plate3-0205 | Efficiency Aggregators | 17.85 | 45.26 | 16.26 |
| Experiment 3-1-Plate3-0206 | Efficiency Aggregators | 17.09 | 46.26 | 15.78 |
| Experiment 3-1-Plate3-0207 | Efficiency Aggregators | 17.23 | 46.43 | 16.01 |
| Experiment 3-1-Plate3-0208 | Efficiency Aggregators | 17.99 | 44.78 | 16.60 |
| Experiment 3-1-Plate3-0209 | Efficiency Aggregators | 19.23 | 43.20 | 16.96 |
| Experiment 3-1-Plate3-0210 | Efficiency Aggregators | 17.32 | 46.56 | 15.92 |
| Experiment 3-1-Plate3-0211 | Efficiency Aggregators | 17.32 | 46.51 | 16.22 |
| Experiment 3-1-Plate3-0212 | Efficiency Aggregators | 18.12 | 45.62 | 16.19 |
| Experiment 3-1-Plate3-0213 | Efficiency Aggregators | 18.01 | 45.11 | 16.49 |
| Experiment 3-1-Plate3-0214 | Efficiency Aggregators | 18.87 | 44.12 | 16.79 |
| Experiment 3-1-Plate3-0215 | Efficiency Aggregators | 17.51 | 46.44 | 15.71 |
| Experiment 3-1-Plate3-0216 | Efficiency Aggregators | 16.85 | 46.08 | 15.85 |
| Experiment 3-1-Plate3-0217 | Efficiency Aggregators | 17.01 | 46.81 | 15.91 |
| Experiment 3-1-Plate3-0218 | Efficiency Aggregators | 19.71 | 42.96 | 15.92 |
| Experiment 3-1-Plate3-0219 | Efficiency Aggregators | 18.59 | 44.28 | 15.76 |
| Experiment 3-1-Plate3-0220 | Efficiency Aggregators | 17.94 | 46.06 | 14.85 |
| Experiment 3-1-Plate3-0221 | Efficiency Aggregators | 18.97 | 44.10 | 15.98 |
| Experiment 3-1-Plate3-0222 | Efficiency Aggregators | 17.60 | 45.93 | 16.10 |
| Experiment 3-1-Plate3-0223 | Efficiency Aggregators | 17.36 | 46.29 | 15.94 |
| Experiment 3-1-Plate3-0224 | Efficiency Aggregators | 18.50 | 44.47 | 16.71 |
| Experiment 3-1-Plate3-0225 | Efficiency Aggregators | 16.81 | 47.03 | 15.76 |
| Experiment 3-1-Plate3-0226 | Efficiency Aggregators | 16.91 | 46.43 | 15.68 |
| Experiment 3-1-Plate3-0227 | Efficiency Aggregators | 17.18 | 45.94 | 16.03 |
| Experiment 3-1-Plate3-0228 | Efficiency Aggregators | 17.07 | 45.16 | 15.95 |
| Experiment 3-1-Plate3-0229 | Efficiency Aggregators | 17.50 | 46.11 | 15.86 |
| Experiment 3-1-Plate3-0230 | Efficiency Aggregators | 19.69 | 42.78 | 16.96 |
| Experiment 3-1-Plate3-0231 | Efficiency Aggregators | 16.90 | 47.16 | 15.88 |
| Experiment 3-1-Plate3-0232 | Efficiency Aggregators | 17.51 | 46.20 | 15.47 |
| Experiment 3-1-Plate3-0233 | Efficiency Aggregators | 18.31 | 44.62 | 16.36 |
| Experiment 3-1-Plate3-0234 | Efficiency Aggregators | 18.74 | 43.86 | 16.96 |
| Experiment 3-1-Plate3-0235 | Efficiency Aggregators | 17.89 | 45.56 | 16.19 |
| Experiment 3-1-Plate3-0236 | Efficiency Aggregators | 16.74 | 47.25 | 15.34 |
| Experiment 3-1-Plate3-0237 | Efficiency Aggregators | 16.91 | 46.93 | 16.10 |
| Experiment 3-1-Plate3-0238 | Efficiency Aggregators | 17.71 | 45.63 | 15.97 |
| Experiment 3-1-Plate3-0239 | Efficiency Aggregators | 17.30 | 46.36 | 15.70 |
| Experiment 3-1-Plate3-0240 | Efficiency Aggregators | 16.74 | 46.58 | 15.64 |
| Experiment 3-1-Plate3-0241 | Efficiency Aggregators | 18.03 | 45.73 | 14.97 |
| Experiment 3-1-Plate3-0242 | Efficiency Aggregators | 18.13 | 45.46 | 15.22 |
| Experiment 3-1-Plate3-0243 | Efficiency Aggregators | 19.16 | 44.38 | 14.48 |
| Experiment 3-1-Plate3-0244 | Efficiency Aggregators | 17.42 | 46.60 | 14.87 |
| Experiment 3-1-Plate3-0245 | Efficiency Aggregators | 19.00 | 43.71 | 16.90 |
| Experiment 3-1-Plate3-0246 | Efficiency Aggregators | 17.43 | 46.28 | 15.98 |
| Experiment 3-1-Plate3-0247 | Efficiency Aggregators | 18.27 | 44.84 | 16.26 |
| Experiment 3-1-Plate3-0248 | Efficiency Aggregators | 16.54 | 47.65 | 15.67 |
| Experiment 3-1-Plate3-0249 | Efficiency Aggregators | 17.50 | 46.06 | 16.17 |
| Experiment 3-1-Plate3-0250 | Efficiency Aggregators | 16.75 | 47.20 | 15.70 |
| Experiment 3-1-Plate3-0251 | Efficiency Aggregators | 16.90 | 46.73 | 15.81 |
| Experiment 3-1-Plate3-0252 | Efficiency Aggregators | 17.34 | 45.67 | 16.09 |
| Experiment 3-1-Plate3-0253 | Efficiency Aggregators | 16.88 | 47.42 | 15.19 |

|                            |                        |       |       |       |
|----------------------------|------------------------|-------|-------|-------|
| Experiment 3-1-Plate3-0254 | Efficiency Aggregators | 18.18 | 44.73 | 16.48 |
| Experiment 3-1-Plate3-0255 | Efficiency Aggregators | 16.75 | 47.34 | 15.73 |
| Experiment 3-1-Plate3-0256 | Efficiency Aggregators | 17.03 | 47.16 | 14.84 |
| Experiment 3-1-Plate3-0257 | Efficiency Aggregators | 16.70 | 47.52 | 15.54 |
| Experiment 3-1-Plate3-0258 | Efficiency Aggregators | 17.41 | 46.57 | 14.82 |
| Experiment 3-1-Plate3-0259 | Efficiency Aggregators | 16.50 | 47.65 | 15.67 |
| Experiment 3-1-Plate3-0260 | Efficiency Aggregators | 16.75 | 46.80 | 16.07 |
| Experiment 3-1-Plate3-0261 | Efficiency Aggregators | 16.66 | 47.46 | 15.59 |
| Experiment 3-1-Plate3-0262 | Efficiency Aggregators | 19.21 | 43.85 | 14.93 |
| Experiment 3-1-Plate3-0263 | Efficiency Aggregators | 17.66 | 46.38 | 13.85 |
| Experiment 3-1-Plate3-0264 | Efficiency Aggregators | 17.32 | 46.49 | 14.27 |
| Experiment 3-1-Plate3-0265 | Efficiency Aggregators | 16.93 | 47.32 | 15.57 |
| Experiment 3-1-Plate3-0266 | Efficiency Aggregators | 16.79 | 47.48 | 15.44 |
| Experiment 3-1-Plate3-0267 | Efficiency Aggregators | 17.19 | 46.72 | 15.91 |
| Experiment 3-1-Plate3-0268 | Efficiency Aggregators | 16.53 | 48.20 | 15.19 |
| Experiment 3-1-Plate3-0269 | Efficiency Aggregators | 17.56 | 46.08 | 16.04 |
| Experiment 3-1-Plate3-0270 | Efficiency Aggregators | 17.73 | 46.08 | 15.95 |
| Experiment 3-1-Plate3-0271 | Efficiency Aggregators | 17.55 | 45.86 | 16.04 |
| Experiment 3-1-Plate3-0272 | Efficiency Aggregators | 16.86 | 46.42 | 16.24 |
| Experiment 3-1-Plate3-0273 | Efficiency Aggregators | 17.56 | 45.71 | 16.10 |
| Experiment 3-1-Plate3-0274 | Efficiency Aggregators | 17.63 | 45.89 | 15.19 |
| Experiment 3-1-Plate3-0275 | Efficiency Aggregators | 18.28 | 45.83 | 14.09 |
| Experiment 3-1-Plate3-0276 | Efficiency Aggregators | 17.29 | 46.65 | 14.80 |
| Experiment 3-1-Plate3-0277 | Efficiency Aggregators | 17.04 | 47.52 | 17.04 |
| Experiment 3-1-Plate3-0278 | Efficiency Aggregators | 17.87 | 45.75 | 15.62 |
| Experiment 3-1-Plate3-0279 | Efficiency Aggregators | 13.67 | 54.89 | 14.38 |
| Experiment 3-1-Plate3-0280 | Efficiency Aggregators | 17.20 | 46.89 | 15.00 |
| Experiment 3-1-Plate3-0281 | Efficiency Aggregators | 17.15 | 46.84 | 15.76 |
| Experiment 3-1-Plate3-0282 | Efficiency Aggregators | 17.53 | 46.31 | 15.43 |
| Experiment 3-1-Plate3-0283 | Efficiency Aggregators | 17.83 | 44.90 | 15.88 |
| Experiment 3-1-Plate3-0284 | Efficiency Aggregators | 16.64 | 47.45 | 15.61 |
| Experiment 3-1-Plate3-0285 | Efficiency Aggregators | 18.04 | 45.44 | 14.99 |
| Experiment 3-1-Plate3-0286 | Efficiency Aggregators | 19.13 | 44.76 | 13.49 |
| Experiment 3-1-Plate3-0287 | Efficiency Aggregators | 19.02 | 44.87 | 13.52 |
| Experiment 3-1-Plate3-0288 | Efficiency Aggregators | 19.85 | 43.40 | 14.39 |
| Experiment 3-1-Plate3-0289 | Efficiency Aggregators | 17.67 | 45.44 | 15.97 |
| Experiment 3-1-Plate3-0290 | Efficiency Aggregators | 17.69 | 45.98 | 14.92 |
| Experiment 3-1-Plate3-0291 | Efficiency Aggregators | 17.54 | 46.20 | 15.67 |
| Experiment 3-1-Plate3-0292 | Efficiency Aggregators | 17.33 | 46.41 | 15.95 |
| Experiment 3-1-Plate3-0293 | Efficiency Aggregators | 17.34 | 46.07 | 15.13 |
| Experiment 3-1-Plate3-0294 | Efficiency Aggregators | 18.88 | 44.44 | 15.98 |
| Experiment 3-1-Plate3-0295 | Efficiency Aggregators | 17.05 | 46.93 | 15.77 |
| Experiment 3-1-Plate3-0296 | Efficiency Aggregators | 17.68 | 45.65 | 16.18 |
| Experiment 3-1-Plate3-0297 | Efficiency Aggregators | 17.79 | 45.67 | 15.51 |
| Experiment 3-1-Plate3-0298 | Efficiency Aggregators | 18.22 | 45.60 | 13.92 |
| Experiment 3-1-Plate3-0299 | Efficiency Aggregators | 18.36 | 44.81 | 14.95 |
| Experiment 3-1-Plate3-0300 | Efficiency Aggregators | 18.33 | 44.81 | 14.99 |
| Experiment 3-1-Plate3-0301 | Efficiency Aggregators | 17.11 | 46.54 | 15.88 |
| Experiment 3-1-Plate3-0302 | Efficiency Aggregators | 17.13 | 46.92 | 15.59 |
| Experiment 3-1-Plate3-0303 | Efficiency Aggregators | 16.44 | 47.38 | 15.56 |
| Experiment 3-1-Plate3-0304 | Efficiency Aggregators | 17.56 | 45.84 | 15.98 |
| Experiment 3-1-Plate3-0305 | Efficiency Aggregators | 18.61 | 44.29 | 16.71 |
| Experiment 3-1-Plate3-0306 | Efficiency Aggregators | 17.22 | 46.28 | 15.86 |
| Experiment 3-1-Plate3-0307 | Efficiency Aggregators | 16.92 | 46.83 | 15.85 |
| Experiment 3-1-Plate3-0308 | Efficiency Aggregators | 17.39 | 46.28 | 16.01 |
| Experiment 3-1-Plate3-0309 | Efficiency Aggregators | 16.76 | 46.79 | 15.44 |
| Experiment 3-1-Plate3-0310 | Efficiency Aggregators | 18.99 | 44.61 | 14.00 |
| Experiment 3-1-Plate3-0311 | Efficiency Aggregators | 20.97 | 40.84 | 16.06 |
| Experiment 3-1-Plate3-0312 | Efficiency Aggregators | 19.30 | 43.88 | 14.53 |
| Experiment 3-1-Plate3-0313 | Efficiency Aggregators | 16.72 | 47.39 | 15.78 |
| Experiment 3-1-Plate3-0314 | Efficiency Aggregators | 16.45 | 47.56 | 15.63 |
| Experiment 3-1-Plate3-0315 | Efficiency Aggregators | 16.93 | 47.12 | 15.56 |
| Experiment 3-1-Plate3-0316 | Efficiency Aggregators | 17.32 | 46.57 | 16.05 |
| Experiment 3-1-Plate3-0317 | Efficiency Aggregators | 16.65 | 47.12 | 15.71 |
| Experiment 3-1-Plate3-0318 | Efficiency Aggregators | 18.53 | 44.17 | 16.80 |
| Experiment 3-1-Plate3-0319 | Efficiency Aggregators | 19.33 | 43.13 | 16.96 |
| Experiment 3-1-Plate3-0320 | Efficiency Aggregators | 19.07 | 43.15 | 16.77 |
| Experiment 3-1-Plate3-0321 | Efficiency Aggregators | 17.11 | 46.78 | 15.97 |
| Experiment 3-1-Plate3-0322 | Efficiency Aggregators | 19.90 | 42.91 | 14.98 |
| Experiment 3-1-Plate3-0323 | Efficiency Aggregators | 17.57 | 45.85 | 15.92 |
| Experiment 3-1-Plate3-0324 | Efficiency Aggregators | 18.95 | 43.92 | 15.07 |
| Experiment 3-1-Plate3-0325 | Efficiency Aggregators | 26.07 | 31.30 | 20.23 |
| Experiment 3-1-Plate3-0326 | Efficiency Aggregators | 17.07 | 46.82 | 15.84 |

|                            |                                   |       |       |       |
|----------------------------|-----------------------------------|-------|-------|-------|
| Experiment 3-1-Plate3-0327 | Efficiency Aggregators            | 17.56 | 46.30 | 14.97 |
| Experiment 3-1-Plate3-0328 | Efficiency Aggregators            | 17.96 | 44.97 | 16.64 |
| Experiment 3-1-Plate3-0329 | Efficiency Aggregators            | 17.27 | 46.39 | 15.87 |
| Experiment 3-1-Plate3-0330 | Efficiency Aggregators            | 18.34 | 44.41 | 16.72 |
| Experiment 3-1-Plate3-0331 | Efficiency Aggregators            | 17.72 | 45.58 | 16.35 |
| Experiment 3-1-Plate3-0332 | Efficiency Aggregators            | 17.48 | 45.66 | 16.08 |
| Experiment 3-1-Plate3-0333 | Efficiency Aggregators            | 17.62 | 45.38 | 16.26 |
| Experiment 3-1-Plate3-0334 | Efficiency Aggregators            | 18.08 | 44.49 | 16.53 |
| Experiment 3-1-Plate3-0335 | Efficiency Aggregators            | 19.43 | 43.30 | 14.24 |
| Experiment 3-1-Plate3-0336 | Efficiency Aggregators            | 19.40 | 43.31 | 14.23 |
| Experiment 3-1-Plate3-0337 | Efficiency Aggregators            | 25.63 | 32.52 | 20.20 |
| Experiment 3-1-Plate3-0338 | Efficiency Aggregators            | 19.97 | 42.41 | 16.28 |
| Experiment 3-1-Plate3-0339 | Efficiency Aggregators            | 16.94 | 46.94 | 15.99 |
| Experiment 3-1-Plate3-0340 | Efficiency Aggregators            | 18.11 | 44.77 | 15.89 |
| Experiment 3-1-Plate3-0341 | Efficiency Aggregators            | 17.82 | 45.25 | 16.25 |
| Experiment 3-1-Plate3-0342 | Efficiency Aggregators            | 18.98 | 43.95 | 15.90 |
| Experiment 3-1-Plate3-0343 | Efficiency Aggregators            | 17.91 | 44.82 | 16.46 |
| Experiment 3-1-Plate3-0344 | Efficiency Aggregators            | 19.17 | 43.53 | 16.94 |
| Experiment 3-1-Plate3-0345 | Efficiency Aggregators            | 17.50 | 45.75 | 16.07 |
| Experiment 3-1-Plate3-0346 | Efficiency Aggregators            | 18.30 | 44.46 | 16.57 |
| Experiment 3-1-Plate3-0347 | Efficiency Aggregators            | 17.19 | 46.04 | 15.93 |
| Experiment 3-1-Plate3-0348 | Efficiency Aggregators            | 17.75 | 44.93 | 16.20 |
| Experiment 3-1-Plate3-0349 | Efficiency Aggregators            | 20.75 | 41.41 | 17.57 |
| Experiment 3-1-Plate3-0350 | Efficiency Aggregators            | 23.05 | 37.16 | 17.78 |
| Experiment 3-1-Plate3-0351 | Efficiency Aggregators            | 18.00 | 45.30 | 16.35 |
| Experiment 3-1-Plate3-0352 | Efficiency Aggregators            | 17.83 | 45.34 | 16.52 |
| Experiment 3-1-Plate3-0353 | Efficiency Aggregators            | 18.10 | 44.66 | 16.50 |
| Experiment 3-1-Plate3-0354 | Efficiency Aggregators            | 17.55 | 45.62 | 16.03 |
| Experiment 3-1-Plate3-0355 | Efficiency Aggregators            | 17.84 | 45.48 | 15.82 |
| Experiment 3-1-Plate3-0356 | Efficiency Aggregators            | 17.83 | 45.36 | 16.00 |
| Experiment 3-1-Plate3-0357 | Efficiency Aggregators            | 17.68 | 45.37 | 16.33 |
| Experiment 3-1-Plate3-0358 | Efficiency Aggregators            | 17.92 | 44.80 | 16.34 |
| Experiment 3-1-Plate3-0359 | Efficiency Aggregators            | 17.55 | 45.35 | 16.15 |
| Experiment 3-1-Plate3-0360 | Efficiency Aggregators            | 17.06 | 45.89 | 15.84 |
| Experiment 3-1-Plate3-0361 | Efficiency Aggregators            | 22.77 | 37.88 | 17.84 |
| Experiment 3-1-Plate3-0362 | Efficiency Aggregators            | 18.42 | 44.83 | 15.27 |
| Experiment 3-1-Plate3-0363 | Efficiency Aggregators            | 18.24 | 44.87 | 15.35 |
| Experiment 3-1-Plate3-0364 | Efficiency Aggregators            | 18.16 | 44.89 | 16.69 |
| Experiment 3-1-Plate3-0365 | Efficiency Aggregators            | 18.43 | 44.69 | 15.20 |
| Experiment 3-1-Plate3-0366 | Efficiency Aggregators            | 17.45 | 45.77 | 16.11 |
| Experiment 3-1-Plate3-0367 | Efficiency Aggregators            | 17.15 | 46.58 | 16.21 |
| Experiment 3-1-Plate3-0368 | Efficiency Aggregators            | 17.78 | 45.33 | 16.24 |
| Experiment 3-1-Plate3-0369 | Efficiency Aggregators            | 17.90 | 45.26 | 16.32 |
| Experiment 3-1-Plate3-0370 | Efficiency Aggregators            | 17.53 | 45.15 | 16.35 |
| Experiment 3-1-Plate3-0371 | Efficiency Aggregators            | 17.62 | 45.60 | 16.05 |
| Experiment 3-1-Plate3-0372 | Efficiency Aggregators            | 17.80 | 44.87 | 16.23 |
| Experiment 3-1-Plate3-0373 | Efficiency Aggregators            | 17.05 | 46.78 | 15.70 |
| Experiment 3-1-Plate3-0374 | Efficiency Aggregators            | 16.93 | 46.59 | 16.33 |
| Experiment 3-1-Plate3-0375 | Efficiency Aggregators            | 17.70 | 45.61 | 16.49 |
| Experiment 3-1-Plate3-0376 | Efficiency Aggregators            | 17.47 | 45.57 | 16.50 |
| Experiment 3-1-Plate3-0377 | Efficiency Aggregators            | 18.81 | 43.69 | 16.89 |
| Experiment 3-1-Plate3-0378 | Efficiency Aggregators            | 17.37 | 45.91 | 16.27 |
| Experiment 3-1-Plate3-0379 | Efficiency Aggregators            | 17.32 | 46.21 | 16.15 |
| Experiment 3-1-Plate3-0380 | Efficiency Aggregators            | 17.18 | 46.36 | 15.79 |
| Experiment 3-1-Plate3-0381 | Efficiency Aggregators            | 18.53 | 44.24 | 16.32 |
| Experiment 3-1-Plate3-0382 | Efficiency Aggregators            | 18.25 | 45.08 | 16.24 |
| Experiment 3-1-Plate3-0383 | Efficiency Aggregators            | 19.61 | 42.49 | 16.94 |
| Experiment 3-1-Plate3-0384 | Efficiency Aggregators            | 18.56 | 43.62 | 16.76 |
| Experiment 3-1-Plate4-0001 | New Parallel Photoreactor_1000 mW | 44.68 | 0.00  | 32.33 |
| Experiment 3-1-Plate4-0002 | New Parallel Photoreactor_1000 mW | 44.16 | 0.96  | 31.56 |
| Experiment 3-1-Plate4-0003 | New Parallel Photoreactor_1000 mW | 44.86 | 0.00  | 32.07 |
| Experiment 3-1-Plate4-0004 | New Parallel Photoreactor_1000 mW | 44.71 | 0.00  | 31.66 |
| Experiment 3-1-Plate4-0005 | New Parallel Photoreactor_1000 mW | 40.88 | 0.00  | 29.09 |
| Experiment 3-1-Plate4-0006 | New Parallel Photoreactor_1000 mW | 44.44 | 0.00  | 31.16 |
| Experiment 3-1-Plate4-0007 | New Parallel Photoreactor_1000 mW | 44.27 | 0.00  | 30.93 |
| Experiment 3-1-Plate4-0008 | New Parallel Photoreactor_1000 mW | 43.77 | 0.00  | 30.97 |
| Experiment 3-1-Plate4-0009 | New Parallel Photoreactor_1000 mW | 43.93 | 0.00  | 30.63 |
| Experiment 3-1-Plate4-0010 | New Parallel Photoreactor_1000 mW | 43.99 | 0.00  | 31.00 |
| Experiment 3-1-Plate4-0011 | New Parallel Photoreactor_1000 mW | 43.82 | 0.00  | 30.64 |
| Experiment 3-1-Plate4-0012 | New Parallel Photoreactor_1000 mW | 43.07 | 0.00  | 30.13 |
| Experiment 3-1-Plate4-0013 | New Parallel Photoreactor_1000 mW | 43.58 | 0.00  | 31.85 |
| Experiment 3-1-Plate4-0014 | New Parallel Photoreactor_1000 mW | 43.21 | 0.00  | 29.98 |
| Experiment 3-1-Plate4-0015 | New Parallel Photoreactor_1000 mW | 43.43 | 0.00  | 30.55 |



|                            |                           |         |       |      |       |
|----------------------------|---------------------------|---------|-------|------|-------|
| Experiment 3-1-Plate4-0016 | New Parallel Photoreactor | 1000 mW | 43.54 | 0.74 | 30.74 |
| Experiment 3-1-Plate4-0017 | New Parallel Photoreactor | 1000 mW | 43.74 | 0.00 | 30.61 |
| Experiment 3-1-Plate4-0018 | New Parallel Photoreactor | 1000 mW | 43.66 | 0.93 | 30.36 |
| Experiment 3-1-Plate4-0019 | New Parallel Photoreactor | 1000 mW | 43.63 | 0.00 | 30.70 |
| Experiment 3-1-Plate4-0020 | New Parallel Photoreactor | 1000 mW | 43.85 | 0.00 | 30.32 |
| Experiment 3-1-Plate4-0021 | New Parallel Photoreactor | 1000 mW | 43.68 | 0.00 | 30.55 |
| Experiment 3-1-Plate4-0022 | New Parallel Photoreactor | 1000 mW | 43.82 | 0.00 | 30.21 |
| Experiment 3-1-Plate4-0023 | New Parallel Photoreactor | 1000 mW | 43.93 | 0.00 | 30.28 |
| Experiment 3-1-Plate4-0024 | New Parallel Photoreactor | 1000 mW | 43.83 | 0.00 | 30.04 |
| Experiment 3-1-Plate4-0025 | New Parallel Photoreactor | 1000 mW | 43.69 | 0.00 | 31.47 |
| Experiment 3-1-Plate4-0026 | New Parallel Photoreactor | 1000 mW | 43.47 | 0.00 | 30.98 |
| Experiment 3-1-Plate4-0027 | New Parallel Photoreactor | 1000 mW | 43.66 | 0.00 | 30.86 |
| Experiment 3-1-Plate4-0028 | New Parallel Photoreactor | 1000 mW | 43.09 | 1.12 | 30.09 |
| Experiment 3-1-Plate4-0029 | New Parallel Photoreactor | 1000 mW | 43.85 | 0.00 | 30.50 |
| Experiment 3-1-Plate4-0030 | New Parallel Photoreactor | 1000 mW | 44.07 | 0.00 | 30.78 |
| Experiment 3-1-Plate4-0031 | New Parallel Photoreactor | 1000 mW | 43.67 | 0.66 | 29.94 |
| Experiment 3-1-Plate4-0032 | New Parallel Photoreactor | 1000 mW | 44.00 | 0.00 | 30.04 |
| Experiment 3-1-Plate4-0033 | New Parallel Photoreactor | 1000 mW | 43.82 | 0.00 | 30.16 |
| Experiment 3-1-Plate4-0034 | New Parallel Photoreactor | 1000 mW | 43.92 | 0.00 | 29.89 |
| Experiment 3-1-Plate4-0035 | New Parallel Photoreactor | 1000 mW | 44.49 | 0.97 | 29.05 |
| Experiment 3-1-Plate4-0036 | New Parallel Photoreactor | 1000 mW | 44.02 | 0.00 | 30.03 |
| Experiment 3-1-Plate4-0037 | New Parallel Photoreactor | 1000 mW | 43.80 | 0.00 | 31.70 |
| Experiment 3-1-Plate4-0038 | New Parallel Photoreactor | 1000 mW | 43.62 | 0.00 | 30.66 |
| Experiment 3-1-Plate4-0039 | New Parallel Photoreactor | 1000 mW | 43.80 | 0.51 | 30.37 |
| Experiment 3-1-Plate4-0040 | New Parallel Photoreactor | 1000 mW | 44.04 | 0.00 | 30.90 |
| Experiment 3-1-Plate4-0041 | New Parallel Photoreactor | 1000 mW | 43.55 | 0.00 | 30.52 |
| Experiment 3-1-Plate4-0042 | New Parallel Photoreactor | 1000 mW | 43.86 | 0.00 | 30.14 |
| Experiment 3-1-Plate4-0043 | New Parallel Photoreactor | 1000 mW | 43.61 | 0.00 | 30.05 |
| Experiment 3-1-Plate4-0044 | New Parallel Photoreactor | 1000 mW | 43.95 | 0.00 | 30.58 |
| Experiment 3-1-Plate4-0045 | New Parallel Photoreactor | 1000 mW | 43.49 | 0.00 | 30.64 |
| Experiment 3-1-Plate4-0046 | New Parallel Photoreactor | 1000 mW | 44.04 | 0.00 | 30.07 |
| Experiment 3-1-Plate4-0047 | New Parallel Photoreactor | 1000 mW | 44.02 | 0.00 | 30.34 |
| Experiment 3-1-Plate4-0048 | New Parallel Photoreactor | 1000 mW | 44.22 | 0.00 | 30.01 |
| Experiment 3-1-Plate4-0049 | New Parallel Photoreactor | 1000 mW | 43.86 | 0.00 | 31.17 |
| Experiment 3-1-Plate4-0050 | New Parallel Photoreactor | 1000 mW | 43.59 | 0.00 | 30.69 |
| Experiment 3-1-Plate4-0051 | New Parallel Photoreactor | 1000 mW | 44.18 | 0.00 | 29.11 |
| Experiment 3-1-Plate4-0052 | New Parallel Photoreactor | 1000 mW | 43.67 | 0.00 | 30.52 |
| Experiment 3-1-Plate4-0053 | New Parallel Photoreactor | 1000 mW | 43.72 | 0.00 | 30.18 |
| Experiment 3-1-Plate4-0054 | New Parallel Photoreactor | 1000 mW | 43.80 | 0.00 | 30.26 |
| Experiment 3-1-Plate4-0055 | New Parallel Photoreactor | 1000 mW | 43.56 | 0.00 | 30.08 |
| Experiment 3-1-Plate4-0056 | New Parallel Photoreactor | 1000 mW | 43.75 | 0.00 | 30.04 |
| Experiment 3-1-Plate4-0057 | New Parallel Photoreactor | 1000 mW | 43.53 | 0.00 | 30.08 |
| Experiment 3-1-Plate4-0058 | New Parallel Photoreactor | 1000 mW | 44.21 | 0.00 | 29.65 |
| Experiment 3-1-Plate4-0059 | New Parallel Photoreactor | 1000 mW | 44.11 | 0.00 | 28.89 |
| Experiment 3-1-Plate4-0060 | New Parallel Photoreactor | 1000 mW | 44.36 | 0.00 | 28.94 |
| Experiment 3-1-Plate4-0061 | New Parallel Photoreactor | 1000 mW | 43.97 | 0.00 | 31.34 |
| Experiment 3-1-Plate4-0062 | New Parallel Photoreactor | 1000 mW | 44.53 | 0.00 | 29.40 |
| Experiment 3-1-Plate4-0063 | New Parallel Photoreactor | 1000 mW | 44.35 | 0.00 | 29.55 |
| Experiment 3-1-Plate4-0064 | New Parallel Photoreactor | 1000 mW | 44.19 | 0.00 | 29.74 |
| Experiment 3-1-Plate4-0065 | New Parallel Photoreactor | 1000 mW | 44.10 | 0.00 | 29.70 |
| Experiment 3-1-Plate4-0066 | New Parallel Photoreactor | 1000 mW | 43.75 | 1.23 | 29.87 |
| Experiment 3-1-Plate4-0067 | New Parallel Photoreactor | 1000 mW | 44.48 | 0.00 | 30.11 |
| Experiment 3-1-Plate4-0068 | New Parallel Photoreactor | 1000 mW | 44.20 | 0.00 | 30.37 |
| Experiment 3-1-Plate4-0069 | New Parallel Photoreactor | 1000 mW | 43.67 | 0.00 | 30.95 |
| Experiment 3-1-Plate4-0070 | New Parallel Photoreactor | 1000 mW | 44.22 | 0.00 | 30.21 |
| Experiment 3-1-Plate4-0071 | New Parallel Photoreactor | 1000 mW | 43.94 | 0.00 | 29.94 |
| Experiment 3-1-Plate4-0072 | New Parallel Photoreactor | 1000 mW | 43.90 | 0.00 | 30.15 |
| Experiment 3-1-Plate4-0073 | New Parallel Photoreactor | 1000 mW | 44.55 | 0.00 | 29.90 |
| Experiment 3-1-Plate4-0074 | New Parallel Photoreactor | 1000 mW | 44.18 | 0.00 | 29.62 |
| Experiment 3-1-Plate4-0075 | New Parallel Photoreactor | 1000 mW | 44.09 | 0.00 | 29.46 |
| Experiment 3-1-Plate4-0076 | New Parallel Photoreactor | 1000 mW | 44.42 | 0.00 | 29.20 |
| Experiment 3-1-Plate4-0077 | New Parallel Photoreactor | 1000 mW | 44.85 | 0.00 | 29.25 |
| Experiment 3-1-Plate4-0078 | New Parallel Photoreactor | 1000 mW | 44.13 | 0.00 | 30.11 |
| Experiment 3-1-Plate4-0079 | New Parallel Photoreactor | 1000 mW | 43.87 | 0.00 | 29.68 |
| Experiment 3-1-Plate4-0080 | New Parallel Photoreactor | 1000 mW | 44.42 | 0.00 | 30.13 |
| Experiment 3-1-Plate4-0081 | New Parallel Photoreactor | 1000 mW | 43.66 | 0.00 | 29.97 |
| Experiment 3-1-Plate4-0082 | New Parallel Photoreactor | 1000 mW | 43.75 | 0.00 | 29.92 |
| Experiment 3-1-Plate4-0083 | New Parallel Photoreactor | 1000 mW | 43.75 | 0.00 | 30.00 |
| Experiment 3-1-Plate4-0084 | New Parallel Photoreactor | 1000 mW | 43.74 | 0.00 | 30.12 |
| Experiment 3-1-Plate4-0085 | New Parallel Photoreactor | 1000 mW | 44.41 | 0.00 | 29.69 |
| Experiment 3-1-Plate4-0086 | New Parallel Photoreactor | 1000 mW | 44.65 | 0.00 | 28.99 |
| Experiment 3-1-Plate4-0087 | New Parallel Photoreactor | 1000 mW | 44.18 | 0.00 | 29.31 |
| Experiment 3-1-Plate4-0088 | New Parallel Photoreactor | 1000 mW | 44.74 | 0.00 | 28.62 |

|                            |                           |         |       |      |       |
|----------------------------|---------------------------|---------|-------|------|-------|
| Experiment 3-1-Plate4-0089 | New Parallel Photoreactor | 1000 mW | 44.57 | 0.00 | 29.07 |
| Experiment 3-1-Plate4-0090 | New Parallel Photoreactor | 1000 mW | 44.33 | 1.07 | 28.90 |
| Experiment 3-1-Plate4-0091 | New Parallel Photoreactor | 1000 mW | 43.83 | 0.00 | 29.71 |
| Experiment 3-1-Plate4-0092 | New Parallel Photoreactor | 1000 mW | 43.98 | 0.00 | 29.85 |
| Experiment 3-1-Plate4-0093 | New Parallel Photoreactor | 1000 mW | 44.10 | 0.00 | 29.97 |
| Experiment 3-1-Plate4-0094 | New Parallel Photoreactor | 1000 mW | 43.98 | 0.00 | 29.83 |
| Experiment 3-1-Plate4-0095 | New Parallel Photoreactor | 1000 mW | 43.90 | 0.00 | 29.89 |
| Experiment 3-1-Plate4-0096 | New Parallel Photoreactor | 1000 mW | 44.18 | 0.00 | 29.94 |
| Experiment 3-1-Plate4-0097 | New Parallel Photoreactor | 1000 mW | 45.51 | 0.00 | 29.71 |
| Experiment 3-1-Plate4-0098 | New Parallel Photoreactor | 1000 mW | 44.83 | 0.00 | 28.96 |
| Experiment 3-1-Plate4-0099 | New Parallel Photoreactor | 1000 mW | 44.82 | 0.00 | 29.35 |
| Experiment 3-1-Plate4-0100 | New Parallel Photoreactor | 1000 mW | 45.05 | 0.00 | 29.10 |
| Experiment 3-1-Plate4-0101 | New Parallel Photoreactor | 1000 mW | 44.81 | 0.00 | 28.87 |
| Experiment 3-1-Plate4-0102 | New Parallel Photoreactor | 1000 mW | 44.63 | 0.00 | 29.48 |
| Experiment 3-1-Plate4-0103 | New Parallel Photoreactor | 1000 mW | 44.50 | 0.67 | 29.65 |
| Experiment 3-1-Plate4-0104 | New Parallel Photoreactor | 1000 mW | 44.92 | 0.00 | 29.39 |
| Experiment 3-1-Plate4-0105 | New Parallel Photoreactor | 1000 mW | 43.93 | 0.00 | 30.05 |
| Experiment 3-1-Plate4-0106 | New Parallel Photoreactor | 1000 mW | 44.15 | 0.00 | 29.37 |
| Experiment 3-1-Plate4-0107 | New Parallel Photoreactor | 1000 mW | 43.89 | 0.00 | 29.29 |
| Experiment 3-1-Plate4-0108 | New Parallel Photoreactor | 1000 mW | 43.90 | 0.00 | 29.75 |
| Experiment 3-1-Plate4-0109 | New Parallel Photoreactor | 1000 mW | 44.82 | 0.00 | 29.16 |
| Experiment 3-1-Plate4-0110 | New Parallel Photoreactor | 1000 mW | 44.68 | 0.00 | 28.43 |
| Experiment 3-1-Plate4-0111 | New Parallel Photoreactor | 1000 mW | 44.20 | 0.00 | 29.27 |
| Experiment 3-1-Plate4-0112 | New Parallel Photoreactor | 1000 mW | 44.65 | 0.53 | 29.09 |
| Experiment 3-1-Plate4-0113 | New Parallel Photoreactor | 1000 mW | 44.40 | 0.00 | 29.85 |
| Experiment 3-1-Plate4-0114 | New Parallel Photoreactor | 1000 mW | 44.10 | 0.00 | 29.57 |
| Experiment 3-1-Plate4-0115 | New Parallel Photoreactor | 1000 mW | 44.07 | 0.00 | 30.11 |
| Experiment 3-1-Plate4-0116 | New Parallel Photoreactor | 1000 mW | 44.16 | 1.43 | 29.61 |
| Experiment 3-1-Plate4-0117 | New Parallel Photoreactor | 1000 mW | 43.76 | 0.00 | 29.90 |
| Experiment 3-1-Plate4-0118 | New Parallel Photoreactor | 1000 mW | 43.70 | 0.00 | 29.89 |
| Experiment 3-1-Plate4-0119 | New Parallel Photoreactor | 1000 mW | 43.45 | 0.00 | 29.99 |
| Experiment 3-1-Plate4-0120 | New Parallel Photoreactor | 1000 mW | 43.73 | 0.00 | 29.84 |
| Experiment 3-1-Plate4-0121 | New Parallel Photoreactor | 1000 mW | 44.46 | 0.00 | 29.48 |
| Experiment 3-1-Plate4-0122 | New Parallel Photoreactor | 1000 mW | 44.56 | 0.00 | 29.04 |
| Experiment 3-1-Plate4-0123 | New Parallel Photoreactor | 1000 mW | 44.48 | 0.00 | 29.30 |
| Experiment 3-1-Plate4-0124 | New Parallel Photoreactor | 1000 mW | 43.65 | 0.00 | 29.99 |
| Experiment 3-1-Plate4-0125 | New Parallel Photoreactor | 1000 mW | 44.46 | 0.00 | 29.71 |
| Experiment 3-1-Plate4-0126 | New Parallel Photoreactor | 1000 mW | 44.14 | 0.00 | 30.40 |
| Experiment 3-1-Plate4-0127 | New Parallel Photoreactor | 1000 mW | 44.14 | 0.00 | 29.87 |
| Experiment 3-1-Plate4-0128 | New Parallel Photoreactor | 1000 mW | 43.70 | 0.00 | 30.18 |
| Experiment 3-1-Plate4-0129 | New Parallel Photoreactor | 1000 mW | 44.54 | 0.00 | 29.78 |
| Experiment 3-1-Plate4-0130 | New Parallel Photoreactor | 1000 mW | 43.88 | 0.00 | 30.05 |
| Experiment 3-1-Plate4-0131 | New Parallel Photoreactor | 1000 mW | 43.77 | 0.00 | 30.49 |
| Experiment 3-1-Plate4-0132 | New Parallel Photoreactor | 1000 mW | 43.68 | 0.00 | 30.13 |
| Experiment 3-1-Plate4-0133 | New Parallel Photoreactor | 1000 mW | 43.67 | 0.00 | 30.86 |
| Experiment 3-1-Plate4-0134 | New Parallel Photoreactor | 1000 mW | 44.36 | 0.00 | 29.32 |
| Experiment 3-1-Plate4-0135 | New Parallel Photoreactor | 1000 mW | 43.65 | 0.00 | 30.11 |
| Experiment 3-1-Plate4-0136 | New Parallel Photoreactor | 1000 mW | 43.91 | 0.00 | 29.74 |
| Experiment 3-1-Plate4-0137 | New Parallel Photoreactor | 1000 mW | 43.97 | 0.00 | 29.74 |
| Experiment 3-1-Plate4-0138 | New Parallel Photoreactor | 1000 mW | 43.90 | 0.00 | 28.94 |
| Experiment 3-1-Plate4-0139 | New Parallel Photoreactor | 1000 mW | 44.21 | 0.00 | 30.73 |
| Experiment 3-1-Plate4-0140 | New Parallel Photoreactor | 1000 mW | 43.88 | 0.00 | 30.19 |
| Experiment 3-1-Plate4-0141 | New Parallel Photoreactor | 1000 mW | 43.85 | 0.76 | 29.86 |
| Experiment 3-1-Plate4-0142 | New Parallel Photoreactor | 1000 mW | 44.00 | 0.00 | 30.40 |
| Experiment 3-1-Plate4-0143 | New Parallel Photoreactor | 1000 mW | 43.88 | 0.00 | 29.38 |
| Experiment 3-1-Plate4-0144 | New Parallel Photoreactor | 1000 mW | 44.64 | 0.00 | 30.24 |
| Experiment 3-1-Plate4-0145 | New Parallel Photoreactor | 1000 mW | 43.45 | 0.00 | 31.03 |
| Experiment 3-1-Plate4-0146 | New Parallel Photoreactor | 1000 mW | 43.59 | 0.00 | 30.32 |
| Experiment 3-1-Plate4-0147 | New Parallel Photoreactor | 1000 mW | 43.63 | 0.00 | 30.31 |
| Experiment 3-1-Plate4-0148 | New Parallel Photoreactor | 1000 mW | 43.48 | 0.00 | 30.16 |
| Experiment 3-1-Plate4-0149 | New Parallel Photoreactor | 1000 mW | 43.85 | 0.00 | 30.48 |
| Experiment 3-1-Plate4-0150 | New Parallel Photoreactor | 1000 mW | 42.27 | 0.00 | 33.71 |
| Experiment 3-1-Plate4-0151 | New Parallel Photoreactor | 1000 mW | 43.80 | 0.00 | 30.06 |
| Experiment 3-1-Plate4-0152 | New Parallel Photoreactor | 1000 mW | 43.26 | 0.00 | 30.84 |
| Experiment 3-1-Plate4-0153 | New Parallel Photoreactor | 1000 mW | 43.37 | 0.00 | 30.86 |
| Experiment 3-1-Plate4-0154 | New Parallel Photoreactor | 1000 mW | 44.13 | 0.46 | 29.39 |
| Experiment 3-1-Plate4-0155 | New Parallel Photoreactor | 1000 mW | 42.96 | 0.00 | 29.88 |
| Experiment 3-1-Plate4-0156 | New Parallel Photoreactor | 1000 mW | 42.94 | 0.90 | 30.26 |
| Experiment 3-1-Plate4-0157 | New Parallel Photoreactor | 1000 mW | 43.49 | 0.00 | 30.91 |
| Experiment 3-1-Plate4-0158 | New Parallel Photoreactor | 1000 mW | 43.22 | 0.00 | 30.50 |
| Experiment 3-1-Plate4-0159 | New Parallel Photoreactor | 1000 mW | 43.41 | 0.00 | 31.07 |
| Experiment 3-1-Plate4-0160 | New Parallel Photoreactor | 1000 mW | 43.89 | 0.00 | 30.53 |
| Experiment 3-1-Plate4-0161 | New Parallel Photoreactor | 1000 mW | 43.77 | 0.00 | 30.22 |

|                            |                           |         |       |      |       |
|----------------------------|---------------------------|---------|-------|------|-------|
| Experiment 3-1-Plate4-0162 | New Parallel Photoreactor | 1000 mW | 43.45 | 0.00 | 29.19 |
| Experiment 3-1-Plate4-0163 | New Parallel Photoreactor | 1000 mW | 43.67 | 0.00 | 30.36 |
| Experiment 3-1-Plate4-0164 | New Parallel Photoreactor | 1000 mW | 43.89 | 0.00 | 30.26 |
| Experiment 3-1-Plate4-0165 | New Parallel Photoreactor | 1000 mW | 43.92 | 0.00 | 30.39 |
| Experiment 3-1-Plate4-0166 | New Parallel Photoreactor | 1000 mW | 44.10 | 0.00 | 29.58 |
| Experiment 3-1-Plate4-0167 | New Parallel Photoreactor | 1000 mW | 45.28 | 2.96 | 29.69 |
| Experiment 3-1-Plate4-0168 | New Parallel Photoreactor | 1000 mW | 42.34 | 1.53 | 28.35 |
| Experiment 3-1-Plate4-0169 | New Parallel Photoreactor | 1000 mW | 43.36 | 0.00 | 31.81 |
| Experiment 3-1-Plate4-0170 | New Parallel Photoreactor | 1000 mW | 43.29 | 0.00 | 32.05 |
| Experiment 3-1-Plate4-0171 | New Parallel Photoreactor | 1000 mW | 43.39 | 0.00 | 31.38 |
| Experiment 3-1-Plate4-0172 | New Parallel Photoreactor | 1000 mW | 43.40 | 0.00 | 30.99 |
| Experiment 3-1-Plate4-0173 | New Parallel Photoreactor | 1000 mW | 43.74 | 0.00 | 30.63 |
| Experiment 3-1-Plate4-0174 | New Parallel Photoreactor | 1000 mW | 43.38 | 1.95 | 29.64 |
| Experiment 3-1-Plate4-0175 | New Parallel Photoreactor | 1000 mW | 43.71 | 0.00 | 30.06 |
| Experiment 3-1-Plate4-0176 | New Parallel Photoreactor | 1000 mW | 43.44 | 0.99 | 30.03 |
| Experiment 3-1-Plate4-0177 | New Parallel Photoreactor | 1000 mW | 43.40 | 0.00 | 30.20 |
| Experiment 3-1-Plate4-0178 | New Parallel Photoreactor | 1000 mW | 44.02 | 1.63 | 29.59 |
| Experiment 3-1-Plate4-0179 | New Parallel Photoreactor | 1000 mW | 43.80 | 0.00 | 30.22 |
| Experiment 3-1-Plate4-0180 | New Parallel Photoreactor | 1000 mW | 43.85 | 0.00 | 31.01 |
| Experiment 3-1-Plate4-0181 | New Parallel Photoreactor | 1000 mW | 43.48 | 0.00 | 31.63 |
| Experiment 3-1-Plate4-0182 | New Parallel Photoreactor | 1000 mW | 43.41 | 0.00 | 30.93 |
| Experiment 3-1-Plate4-0183 | New Parallel Photoreactor | 1000 mW | 43.38 | 0.00 | 31.22 |
| Experiment 3-1-Plate4-0184 | New Parallel Photoreactor | 1000 mW | 43.71 | 0.00 | 30.82 |
| Experiment 3-1-Plate4-0185 | New Parallel Photoreactor | 1000 mW | 44.07 | 0.00 | 31.07 |
| Experiment 3-1-Plate4-0186 | New Parallel Photoreactor | 1000 mW | 43.68 | 0.00 | 31.14 |
| Experiment 3-1-Plate4-0187 | New Parallel Photoreactor | 1000 mW | 43.42 | 1.60 | 30.43 |
| Experiment 3-1-Plate4-0188 | New Parallel Photoreactor | 1000 mW | 43.52 | 0.00 | 30.84 |
| Experiment 3-1-Plate4-0189 | New Parallel Photoreactor | 1000 mW | 42.84 | 0.00 | 29.91 |
| Experiment 3-1-Plate4-0190 | New Parallel Photoreactor | 1000 mW | 43.71 | 0.00 | 30.59 |
| Experiment 3-1-Plate4-0191 | New Parallel Photoreactor | 1000 mW | 43.49 | 0.84 | 30.52 |
| Experiment 3-1-Plate4-0192 | New Parallel Photoreactor | 1000 mW | 43.50 | 0.87 | 30.22 |
| Experiment 3-1-Plate4-0193 | New Parallel Photoreactor | 1000 mW | 43.82 | 0.00 | 30.67 |
| Experiment 3-1-Plate4-0194 | New Parallel Photoreactor | 1000 mW | 43.85 | 0.00 | 30.35 |
| Experiment 3-1-Plate4-0195 | New Parallel Photoreactor | 1000 mW | 43.73 | 0.00 | 30.83 |
| Experiment 3-1-Plate4-0196 | New Parallel Photoreactor | 1000 mW | 43.41 | 1.32 | 30.02 |
| Experiment 3-1-Plate4-0197 | New Parallel Photoreactor | 1000 mW | 43.82 | 0.00 | 30.78 |
| Experiment 3-1-Plate4-0198 | New Parallel Photoreactor | 1000 mW | 44.07 | 0.00 | 30.38 |
| Experiment 3-1-Plate4-0199 | New Parallel Photoreactor | 1000 mW | 43.86 | 0.00 | 30.26 |
| Experiment 3-1-Plate4-0200 | New Parallel Photoreactor | 1000 mW | 44.00 | 0.00 | 30.31 |
| Experiment 3-1-Plate4-0201 | New Parallel Photoreactor | 1000 mW | 43.70 | 0.00 | 30.74 |
| Experiment 3-1-Plate4-0202 | New Parallel Photoreactor | 1000 mW | 43.62 | 0.00 | 30.67 |
| Experiment 3-1-Plate4-0203 | New Parallel Photoreactor | 1000 mW | 43.81 | 0.00 | 31.09 |
| Experiment 3-1-Plate4-0204 | New Parallel Photoreactor | 1000 mW | 43.17 | 0.57 | 30.79 |
| Experiment 3-1-Plate4-0205 | New Parallel Photoreactor | 1000 mW | 44.23 | 0.00 | 30.48 |
| Experiment 3-1-Plate4-0206 | New Parallel Photoreactor | 1000 mW | 43.77 | 0.00 | 30.43 |
| Experiment 3-1-Plate4-0207 | New Parallel Photoreactor | 1000 mW | 43.99 | 0.00 | 30.46 |
| Experiment 3-1-Plate4-0208 | New Parallel Photoreactor | 1000 mW | 43.91 | 0.00 | 30.04 |
| Experiment 3-1-Plate4-0209 | New Parallel Photoreactor | 1000 mW | 43.94 | 0.00 | 30.05 |
| Experiment 3-1-Plate4-0210 | New Parallel Photoreactor | 1000 mW | 43.94 | 0.81 | 30.28 |
| Experiment 3-1-Plate4-0211 | New Parallel Photoreactor | 1000 mW | 43.55 | 0.00 | 30.18 |
| Experiment 3-1-Plate4-0212 | New Parallel Photoreactor | 1000 mW | 43.47 | 0.74 | 29.68 |
| Experiment 3-1-Plate4-0213 | New Parallel Photoreactor | 1000 mW | 43.62 | 0.00 | 30.02 |
| Experiment 3-1-Plate4-0214 | New Parallel Photoreactor | 1000 mW | 43.68 | 0.00 | 30.43 |
| Experiment 3-1-Plate4-0215 | New Parallel Photoreactor | 1000 mW | 43.28 | 0.00 | 30.95 |
| Experiment 3-1-Plate4-0216 | New Parallel Photoreactor | 1000 mW | 42.84 | 0.00 | 30.35 |
| Experiment 3-1-Plate4-0217 | New Parallel Photoreactor | 1000 mW | 44.65 | 0.00 | 29.37 |
| Experiment 3-1-Plate4-0218 | New Parallel Photoreactor | 1000 mW | 43.98 | 0.60 | 29.44 |
| Experiment 3-1-Plate4-0219 | New Parallel Photoreactor | 1000 mW | 43.97 | 0.00 | 28.94 |
| Experiment 3-1-Plate4-0220 | New Parallel Photoreactor | 1000 mW | 43.93 | 0.00 | 30.11 |
| Experiment 3-1-Plate4-0221 | New Parallel Photoreactor | 1000 mW | 43.67 | 0.00 | 29.56 |
| Experiment 3-1-Plate4-0222 | New Parallel Photoreactor | 1000 mW | 43.84 | 0.00 | 30.18 |
| Experiment 3-1-Plate4-0223 | New Parallel Photoreactor | 1000 mW | 44.02 | 0.00 | 30.21 |
| Experiment 3-1-Plate4-0224 | New Parallel Photoreactor | 1000 mW | 43.82 | 0.00 | 30.09 |
| Experiment 3-1-Plate4-0225 | New Parallel Photoreactor | 1000 mW | 43.77 | 0.00 | 30.10 |
| Experiment 3-1-Plate4-0226 | New Parallel Photoreactor | 1000 mW | 43.89 | 0.00 | 30.43 |
| Experiment 3-1-Plate4-0227 | New Parallel Photoreactor | 1000 mW | 43.60 | 0.00 | 30.41 |
| Experiment 3-1-Plate4-0228 | New Parallel Photoreactor | 1000 mW | 42.97 | 0.00 | 29.50 |
| Experiment 3-1-Plate4-0229 | New Parallel Photoreactor | 1000 mW | 44.05 | 0.00 | 29.90 |
| Experiment 3-1-Plate4-0230 | New Parallel Photoreactor | 1000 mW | 44.11 | 0.99 | 29.68 |
| Experiment 3-1-Plate4-0231 | New Parallel Photoreactor | 1000 mW | 44.20 | 0.00 | 30.18 |
| Experiment 3-1-Plate4-0232 | New Parallel Photoreactor | 1000 mW | 44.20 | 0.00 | 29.98 |
| Experiment 3-1-Plate4-0233 | New Parallel Photoreactor | 1000 mW | 43.78 | 0.00 | 29.99 |
| Experiment 3-1-Plate4-0234 | New Parallel Photoreactor | 1000 mW | 44.40 | 0.00 | 29.85 |



|                            |                           |         |       |      |       |
|----------------------------|---------------------------|---------|-------|------|-------|
| Experiment 3-1-Plate4-0308 | New Parallel Photoreactor | 1000 mW | 43.74 | 0.00 | 30.08 |
| Experiment 3-1-Plate4-0309 | New Parallel Photoreactor | 1000 mW | 43.88 | 0.00 | 30.28 |
| Experiment 3-1-Plate4-0310 | New Parallel Photoreactor | 1000 mW | 43.93 | 0.00 | 28.99 |
| Experiment 3-1-Plate4-0311 | New Parallel Photoreactor | 1000 mW | 44.70 | 0.00 | 28.51 |
| Experiment 3-1-Plate4-0312 | New Parallel Photoreactor | 1000 mW | 44.71 | 0.69 | 28.51 |
| Experiment 3-1-Plate4-0313 | New Parallel Photoreactor | 1000 mW | 44.01 | 0.00 | 29.97 |
| Experiment 3-1-Plate4-0314 | New Parallel Photoreactor | 1000 mW | 43.61 | 0.00 | 29.18 |
| Experiment 3-1-Plate4-0315 | New Parallel Photoreactor | 1000 mW | 43.29 | 0.00 | 29.99 |
| Experiment 3-1-Plate4-0316 | New Parallel Photoreactor | 1000 mW | 43.78 | 0.00 | 29.90 |
| Experiment 3-1-Plate4-0317 | New Parallel Photoreactor | 1000 mW | 43.93 | 0.00 | 30.11 |
| Experiment 3-1-Plate4-0318 | New Parallel Photoreactor | 1000 mW | 43.56 | 0.00 | 30.06 |
| Experiment 3-1-Plate4-0319 | New Parallel Photoreactor | 1000 mW | 43.68 | 0.00 | 29.99 |
| Experiment 3-1-Plate4-0320 | New Parallel Photoreactor | 1000 mW | 43.43 | 0.00 | 29.79 |
| Experiment 3-1-Plate4-0321 | New Parallel Photoreactor | 1000 mW | 43.82 | 0.00 | 30.13 |
| Experiment 3-1-Plate4-0322 | New Parallel Photoreactor | 1000 mW | 44.07 | 0.00 | 29.51 |
| Experiment 3-1-Plate4-0323 | New Parallel Photoreactor | 1000 mW | 44.04 | 0.00 | 29.04 |
| Experiment 3-1-Plate4-0324 | New Parallel Photoreactor | 1000 mW | 44.68 | 0.00 | 29.14 |
| Experiment 3-1-Plate4-0325 | New Parallel Photoreactor | 1000 mW | 43.40 | 0.00 | 29.71 |
| Experiment 3-1-Plate4-0326 | New Parallel Photoreactor | 1000 mW | 43.72 | 0.00 | 30.05 |
| Experiment 3-1-Plate4-0327 | New Parallel Photoreactor | 1000 mW | 43.62 | 0.00 | 29.61 |
| Experiment 3-1-Plate4-0328 | New Parallel Photoreactor | 1000 mW | 44.44 | 0.45 | 29.52 |
| Experiment 3-1-Plate4-0329 | New Parallel Photoreactor | 1000 mW | 43.98 | 0.00 | 30.82 |
| Experiment 3-1-Plate4-0330 | New Parallel Photoreactor | 1000 mW | 44.03 | 0.00 | 29.85 |
| Experiment 3-1-Plate4-0331 | New Parallel Photoreactor | 1000 mW | 43.77 | 0.00 | 29.80 |
| Experiment 3-1-Plate4-0332 | New Parallel Photoreactor | 1000 mW | 43.55 | 0.84 | 29.64 |
| Experiment 3-1-Plate4-0333 | New Parallel Photoreactor | 1000 mW | 43.85 | 0.00 | 30.30 |
| Experiment 3-1-Plate4-0334 | New Parallel Photoreactor | 1000 mW | 43.81 | 0.00 | 29.95 |
| Experiment 3-1-Plate4-0335 | New Parallel Photoreactor | 1000 mW | 44.23 | 0.66 | 29.06 |
| Experiment 3-1-Plate4-0336 | New Parallel Photoreactor | 1000 mW | 44.13 | 0.00 | 28.97 |
| Experiment 3-1-Plate4-0337 | New Parallel Photoreactor | 1000 mW | 44.17 | 3.39 | 28.60 |
| Experiment 3-1-Plate4-0338 | New Parallel Photoreactor | 1000 mW | 43.53 | 0.74 | 29.65 |
| Experiment 3-1-Plate4-0339 | New Parallel Photoreactor | 1000 mW | 43.81 | 0.00 | 30.41 |
| Experiment 3-1-Plate4-0340 | New Parallel Photoreactor | 1000 mW | 43.70 | 0.48 | 29.30 |
| Experiment 3-1-Plate4-0341 | New Parallel Photoreactor | 1000 mW | 43.57 | 0.00 | 30.05 |
| Experiment 3-1-Plate4-0342 | New Parallel Photoreactor | 1000 mW | 43.58 | 0.00 | 30.64 |
| Experiment 3-1-Plate4-0343 | New Parallel Photoreactor | 1000 mW | 43.63 | 0.00 | 30.22 |
| Experiment 3-1-Plate4-0344 | New Parallel Photoreactor | 1000 mW | 43.42 | 0.00 | 30.46 |
| Experiment 3-1-Plate4-0345 | New Parallel Photoreactor | 1000 mW | 43.80 | 0.00 | 30.54 |
| Experiment 3-1-Plate4-0346 | New Parallel Photoreactor | 1000 mW | 43.93 | 0.00 | 30.11 |
| Experiment 3-1-Plate4-0347 | New Parallel Photoreactor | 1000 mW | 44.02 | 0.00 | 30.33 |
| Experiment 3-1-Plate4-0348 | New Parallel Photoreactor | 1000 mW | 43.91 | 0.00 | 30.70 |
| Experiment 3-1-Plate4-0349 | New Parallel Photoreactor | 1000 mW | 44.60 | 1.76 | 29.27 |
| Experiment 3-1-Plate4-0350 | New Parallel Photoreactor | 1000 mW | 43.44 | 0.47 | 30.00 |
| Experiment 3-1-Plate4-0351 | New Parallel Photoreactor | 1000 mW | 44.16 | 0.00 | 30.23 |
| Experiment 3-1-Plate4-0352 | New Parallel Photoreactor | 1000 mW | 43.96 | 0.00 | 30.64 |
| Experiment 3-1-Plate4-0353 | New Parallel Photoreactor | 1000 mW | 43.69 | 0.45 | 30.41 |
| Experiment 3-1-Plate4-0354 | New Parallel Photoreactor | 1000 mW | 43.57 | 0.00 | 30.64 |
| Experiment 3-1-Plate4-0355 | New Parallel Photoreactor | 1000 mW | 43.76 | 0.00 | 30.28 |
| Experiment 3-1-Plate4-0356 | New Parallel Photoreactor | 1000 mW | 43.95 | 0.00 | 30.69 |
| Experiment 3-1-Plate4-0357 | New Parallel Photoreactor | 1000 mW | 43.56 | 0.00 | 30.09 |
| Experiment 3-1-Plate4-0358 | New Parallel Photoreactor | 1000 mW | 43.58 | 0.52 | 29.97 |
| Experiment 3-1-Plate4-0359 | New Parallel Photoreactor | 1000 mW | 43.67 | 0.00 | 30.32 |
| Experiment 3-1-Plate4-0360 | New Parallel Photoreactor | 1000 mW | 43.10 | 0.00 | 30.29 |
| Experiment 3-1-Plate4-0361 | New Parallel Photoreactor | 1000 mW | 43.78 | 3.08 | 29.27 |
| Experiment 3-1-Plate4-0362 | New Parallel Photoreactor | 1000 mW | 43.42 | 0.00 | 30.62 |
| Experiment 3-1-Plate4-0363 | New Parallel Photoreactor | 1000 mW | 43.96 | 0.00 | 31.21 |
| Experiment 3-1-Plate4-0364 | New Parallel Photoreactor | 1000 mW | 43.59 | 0.00 | 30.66 |
| Experiment 3-1-Plate4-0365 | New Parallel Photoreactor | 1000 mW | 43.86 | 0.00 | 30.80 |
| Experiment 3-1-Plate4-0366 | New Parallel Photoreactor | 1000 mW | 43.83 | 0.00 | 30.59 |
| Experiment 3-1-Plate4-0367 | New Parallel Photoreactor | 1000 mW | 43.73 | 0.00 | 30.37 |
| Experiment 3-1-Plate4-0368 | New Parallel Photoreactor | 1000 mW | 43.60 | 0.00 | 30.33 |
| Experiment 3-1-Plate4-0369 | New Parallel Photoreactor | 1000 mW | 43.63 | 0.00 | 30.41 |
| Experiment 3-1-Plate4-0370 | New Parallel Photoreactor | 1000 mW | 44.09 | 0.00 | 30.70 |
| Experiment 3-1-Plate4-0371 | New Parallel Photoreactor | 1000 mW | 43.70 | 0.00 | 30.19 |
| Experiment 3-1-Plate4-0372 | New Parallel Photoreactor | 1000 mW | 43.54 | 0.00 | 30.58 |
| Experiment 3-1-Plate4-0373 | New Parallel Photoreactor | 1000 mW | 43.18 | 0.00 | 31.08 |
| Experiment 3-1-Plate4-0374 | New Parallel Photoreactor | 1000 mW | 43.08 | 1.33 | 30.23 |
| Experiment 3-1-Plate4-0375 | New Parallel Photoreactor | 1000 mW | 43.51 | 0.00 | 30.65 |
| Experiment 3-1-Plate4-0376 | New Parallel Photoreactor | 1000 mW | 43.69 | 0.00 | 31.17 |
| Experiment 3-1-Plate4-0377 | New Parallel Photoreactor | 1000 mW | 43.61 | 1.79 | 30.25 |
| Experiment 3-1-Plate4-0378 | New Parallel Photoreactor | 1000 mW | 43.92 | 0.00 | 30.84 |
| Experiment 3-1-Plate4-0379 | New Parallel Photoreactor | 1000 mW | 43.69 | 0.00 | 30.82 |
| Experiment 3-1-Plate4-0380 | New Parallel Photoreactor | 1000 mW | 43.57 | 0.91 | 30.29 |

|                            |                                   |       |      |       |
|----------------------------|-----------------------------------|-------|------|-------|
| Experiment 3-1-Plate4-0381 | New Parallel Photoreactor 1000 mW | 43.96 | 3.46 | 29.34 |
| Experiment 3-1-Plate4-0382 | New Parallel Photoreactor 1000 mW | 43.72 | 0.00 | 30.67 |
| Experiment 3-1-Plate4-0383 | New Parallel Photoreactor 1000 mW | 43.46 | 0.00 | 30.33 |
| Experiment 3-1-Plate4-0384 | New Parallel Photoreactor 1000 mW | 43.20 | 0.00 | 31.24 |
