# Supplementary material for: Development of a high intensity parallel photoreactor for high throughput screening
Source: Royal Society of Chemistry journal article supplement (doi:10.1039/d1re00317h), 2021-11-17
Supplement: d1re00317h2.pdf [file d1re00317h2.pdf]

| Sample Name         | Acid                      | Measured Optical Power | Product LCAP | Unreacted S1 LCAP | Protodehalogenation Side Product LCAP |
|---------------------|---------------------------|------------------------|--------------|-------------------|---------------------------------------|
| Experiment 3-2-0001 | <i>n</i> -Hexanoic acid 7 | 1000 mW                | 23.77        | 0.00              | 37.72                                 |
| Experiment 3-2-0002 | <i>n</i> -Hexanoic acid 7 | 1000 mW                | 23.33        | 0.00              | 0.00                                  |
| Experiment 3-2-0003 | <i>n</i> -Hexanoic acid 7 | 1000 mW                | 23.98        | 0.00              | 37.19                                 |
| Experiment 3-2-0004 | <i>n</i> -Hexanoic acid 7 | 1000 mW                | 23.20        | 0.00              | 32.78                                 |
| Experiment 3-2-0005 | <i>n</i> -Hexanoic acid 7 | 1000 mW                | 23.29        | 0.00              | 38.38                                 |
| Experiment 3-2-0006 | <i>n</i> -Hexanoic acid 7 | 1000 mW                | 22.69        | 0.00              | 37.01                                 |
| Experiment 3-2-0007 | <i>n</i> -Hexanoic acid 7 | 1000 mW                | 22.48        | 0.00              | 36.86                                 |
| Experiment 3-2-0008 | <i>n</i> -Hexanoic acid 7 | 1000 mW                | 22.62        | 0.00              | 37.22                                 |
| Experiment 3-2-0009 | <i>n</i> -Hexanoic acid 7 | 1000 mW                | 23.31        | 0.00              | 36.47                                 |
| Experiment 3-2-0010 | <i>n</i> -Hexanoic acid 7 | 1000 mW                | 23.69        | 0.00              | 0.00                                  |
| Experiment 3-2-0011 | <i>n</i> -Hexanoic acid 7 | 1000 mW                | 22.78        | 0.00              | 36.87                                 |
| Experiment 3-2-0012 | <i>n</i> -Hexanoic acid 7 | 1000 mW                | 22.42        | 0.00              | 0.00                                  |
| Experiment 3-2-0013 | <i>n</i> -Hexanoic acid 7 | 1000 mW                | 23.00        | 0.00              | 36.45                                 |
| Experiment 3-2-0014 | <i>n</i> -Hexanoic acid 7 | 1000 mW                | 21.97        | 0.00              | 34.25                                 |
| Experiment 3-2-0015 | <i>n</i> -Hexanoic acid 7 | 1000 mW                | 22.26        | 0.00              | 36.08                                 |
| Experiment 3-2-0016 | <i>n</i> -Hexanoic acid 7 | 1000 mW                | 21.65        | 0.00              | 36.81                                 |
| Experiment 3-2-0017 | <i>n</i> -Hexanoic acid 7 | 1000 mW                | 22.18        | 0.00              | 36.68                                 |
| Experiment 3-2-0018 | <i>n</i> -Hexanoic acid 7 | 1000 mW                | 22.32        | 0.00              | 36.64                                 |
| Experiment 3-2-0019 | <i>n</i> -Hexanoic acid 7 | 1000 mW                | 22.75        | 0.00              | 36.07                                 |
| Experiment 3-2-0020 | <i>n</i> -Hexanoic acid 7 | 1000 mW                | 22.48        | 0.00              | 36.02                                 |
| Experiment 3-2-0021 | <i>n</i> -Hexanoic acid 7 | 1000 mW                | 22.74        | 0.00              | 36.91                                 |
| Experiment 3-2-0022 | <i>n</i> -Hexanoic acid 7 | 1000 mW                | 22.98        | 0.00              | 37.28                                 |
| Experiment 3-2-0023 | <i>n</i> -Hexanoic acid 7 | 1000 mW                | 22.79        | 0.00              | 0.00                                  |
| Experiment 3-2-0024 | <i>n</i> -Hexanoic acid 7 | 1000 mW                | 22.48        | 0.00              | 37.25                                 |
| Experiment 3-2-0025 | <i>n</i> -Hexanoic acid 7 | 1000 mW                | 23.19        | 0.00              | 35.99                                 |
| Experiment 3-2-0026 | <i>n</i> -Hexanoic acid 7 | 1000 mW                | 23.25        | 0.00              | 36.28                                 |
| Experiment 3-2-0027 | <i>n</i> -Hexanoic acid 7 | 1000 mW                | 21.96        | 0.00              | 36.81                                 |
| Experiment 3-2-0028 | <i>n</i> -Hexanoic acid 7 | 1000 mW                | 20.20        | 0.00              | 35.73                                 |
| Experiment 3-2-0029 | <i>n</i> -Hexanoic acid 7 | 1000 mW                | 22.15        | 0.00              | 34.46                                 |
| Experiment 3-2-0030 | <i>n</i> -Hexanoic acid 7 | 1000 mW                | 22.69        | 0.00              | 36.38                                 |
| Experiment 3-2-0031 | <i>n</i> -Hexanoic acid 7 | 1000 mW                | 22.42        | 0.00              | 36.89                                 |
| Experiment 3-2-0032 | <i>n</i> -Hexanoic acid 7 | 1000 mW                | 21.46        | 0.00              | 36.77                                 |
| Experiment 3-2-0033 | <i>n</i> -Hexanoic acid 7 | 500 mW                 | 20.73        | 0.00              | 36.36                                 |
| Experiment 3-2-0034 | <i>n</i> -Hexanoic acid 7 | 500 mW                 | 21.07        | 0.00              | 36.98                                 |
| Experiment 3-2-0035 | <i>n</i> -Hexanoic acid 7 | 500 mW                 | 21.17        | 0.00              | 36.58                                 |
| Experiment 3-2-0036 | <i>n</i> -Hexanoic acid 7 | 500 mW                 | 21.51        | 0.00              | 36.23                                 |
| Experiment 3-2-0037 | <i>n</i> -Hexanoic acid 7 | 500 mW                 | 20.98        | 0.00              | 37.00                                 |
| Experiment 3-2-0038 | <i>n</i> -Hexanoic acid 7 | 500 mW                 | 20.81        | 0.00              | 36.71                                 |
| Experiment 3-2-0039 | <i>n</i> -Hexanoic acid 7 | 500 mW                 | 21.00        | 0.00              | 37.15                                 |
| Experiment 3-2-0040 | <i>n</i> -Hexanoic acid 7 | 500 mW                 | 21.37        | 0.00              | 37.21                                 |
| Experiment 3-2-0041 | <i>n</i> -Hexanoic acid 7 | 500 mW                 | 20.26        | 0.00              | 35.42                                 |
| Experiment 3-2-0042 | <i>n</i> -Hexanoic acid 7 | 500 mW                 | 21.71        | 0.00              | 36.63                                 |
| Experiment 3-2-0043 | <i>n</i> -Hexanoic acid 7 | 500 mW                 | 21.10        | 0.00              | 36.62                                 |
| Experiment 3-2-0044 | <i>n</i> -Hexanoic acid 7 | 500 mW                 | 20.52        | 0.00              | 36.81                                 |
| Experiment 3-2-0045 | <i>n</i> -Hexanoic acid 7 | 500 mW                 | 21.22        | 0.00              | 36.53                                 |
| Experiment 3-2-0046 | <i>n</i> -Hexanoic acid 7 | 500 mW                 | 20.69        | 0.00              | 0.00                                  |
| Experiment 3-2-0047 | <i>n</i> -Hexanoic acid 7 | 500 mW                 | 21.51        | 0.00              | 35.84                                 |
| Experiment 3-2-0048 | <i>n</i> -Hexanoic acid 7 | 500 mW                 | 20.63        | 0.00              | 0.00                                  |
| Experiment 3-2-0049 | <i>n</i> -Hexanoic acid 7 | 500 mW                 | 20.86        | 0.00              | 37.54                                 |
| Experiment 3-2-0050 | <i>n</i> -Hexanoic acid 7 | 500 mW                 | 20.81        | 0.00              | 36.80                                 |
| Experiment 3-2-0051 | <i>n</i> -Hexanoic acid 7 | 500 mW                 | 20.39        | 0.00              | 36.97                                 |
| Experiment 3-2-0052 | <i>n</i> -Hexanoic acid 7 | 500 mW                 | 21.21        | 0.00              | 37.00                                 |
| Experiment 3-2-0053 | <i>n</i> -Hexanoic acid 7 | 500 mW                 | 21.75        | 0.00              | 36.73                                 |
| Experiment 3-2-0054 | <i>n</i> -Hexanoic acid 7 | 500 mW                 | 20.68        | 0.00              | 37.22                                 |
| Experiment 3-2-0055 | <i>n</i> -Hexanoic acid 7 | 500 mW                 | 20.75        | 0.00              | 37.13                                 |
| Experiment 3-2-0056 | <i>n</i> -Hexanoic acid 7 | 500 mW                 | 21.34        | 0.00              | 36.73                                 |
| Experiment 3-2-0057 | <i>n</i> -Hexanoic acid 7 | 500 mW                 | 21.36        | 0.00              | 36.47                                 |
| Experiment 3-2-0058 | <i>n</i> -Hexanoic acid 7 | 500 mW                 | 21.38        | 0.00              | 37.26                                 |
| Experiment 3-2-0059 | <i>n</i> -Hexanoic acid 7 | 500 mW                 | 21.48        | 0.00              | 36.97                                 |
| Experiment 3-2-0060 | <i>n</i> -Hexanoic acid 7 | 500 mW                 | 20.51        | 0.00              | 36.52                                 |
| Experiment 3-2-0061 | <i>n</i> -Hexanoic acid 7 | 500 mW                 | 20.57        | 0.00              | 36.62                                 |
| Experiment 3-2-0062 | <i>n</i> -Hexanoic acid 7 | 500 mW                 | 20.15        | 0.00              | 0.00                                  |
| Experiment 3-2-0063 | <i>n</i> -Hexanoic acid 7 | 500 mW                 | 20.45        | 0.00              | 0.00                                  |
| Experiment 3-2-0064 | <i>n</i> -Hexanoic acid 7 | 500 mW                 | 20.05        | 0.00              | 36.66                                 |
| Experiment 3-2-0065 | <i>n</i> -Hexanoic acid 7 | 250 mW                 | 19.07        | 0.00              | 37.94                                 |
| Experiment 3-2-0066 | <i>n</i> -Hexanoic acid 7 | 250 mW                 | 19.51        | 0.00              | 38.97                                 |
| Experiment 3-2-0067 | <i>n</i> -Hexanoic acid 7 | 250 mW                 | 19.66        | 0.00              | 38.70                                 |
| Experiment 3-2-0068 | <i>n</i> -Hexanoic acid 7 | 250 mW                 | 19.67        | 0.00              | 39.01                                 |
| Experiment 3-2-0069 | <i>n</i> -Hexanoic acid 7 | 250 mW                 | 19.39        | 0.00              | 38.89                                 |
| Experiment 3-2-0070 | <i>n</i> -Hexanoic acid 7 | 250 mW                 | 19.74        | 0.00              | 38.15                                 |
| Experiment 3-2-0071 | <i>n</i> -Hexanoic acid 7 | 250 mW                 | 20.00        | 0.00              | 38.86                                 |
| Experiment 3-2-0072 | <i>n</i> -Hexanoic acid 7 | 250 mW                 | 19.92        | 0.00              | 37.88                                 |
| Experiment 3-2-0073 | <i>n</i> -Hexanoic acid 7 | 250 mW                 | 19.83        | 0.00              | 38.52                                 |
| Experiment 3-2-0074 | <i>n</i> -Hexanoic acid 7 | 250 mW                 | 19.97        | 0.00              | 0.00                                  |
| Experiment 3-2-0075 | <i>n</i> -Hexanoic acid 7 | 250 mW                 | 19.71        | 0.00              | 39.01                                 |
| Experiment 3-2-0076 | <i>n</i> -Hexanoic acid 7 | 250 mW                 | 20.09        | 0.00              | 37.90                                 |
| Experiment 3-2-0077 | <i>n</i> -Hexanoic acid 7 | 250 mW                 | 19.49        | 0.00              | 38.55                                 |
| Experiment 3-2-0078 | <i>n</i> -Hexanoic acid 7 | 250 mW                 | 19.82        | 0.00              | 0.00                                  |
| Experiment 3-2-0079 | <i>n</i> -Hexanoic acid 7 | 250 mW                 | 19.41        | 0.00              | 0.00                                  |
| Experiment 3-2-0080 | <i>n</i> -Hexanoic acid 7 | 250 mW                 | 19.75        | 0.00              | 38.45                                 |
| Experiment 3-2-0081 | <i>n</i> -Hexanoic acid 7 | 250 mW                 | 18.98        | 0.00              | 39.17                                 |
| Experiment 3-2-0082 | <i>n</i> -Hexanoic acid 7 | 250 mW                 | 19.37        | 0.00              | 38.72                                 |
| Experiment 3-2-0083 | <i>n</i> -Hexanoic acid 7 | 250 mW                 | 19.49        | 0.00              | 39.25                                 |

|                     |                           |        |       |       |       |
|---------------------|---------------------------|--------|-------|-------|-------|
| Experiment 3-2-0084 | <i>n</i> -Hexanoic acid 7 | 250 mW | 19.52 | 0.00  | 0.00  |
| Experiment 3-2-0085 | <i>n</i> -Hexanoic acid 7 | 250 mW | 19.82 | 0.00  | 38.81 |
| Experiment 3-2-0086 | <i>n</i> -Hexanoic acid 7 | 250 mW | 19.64 | 0.00  | 38.48 |
| Experiment 3-2-0087 | <i>n</i> -Hexanoic acid 7 | 250 mW | 19.98 | 0.00  | 37.57 |
| Experiment 3-2-0088 | <i>n</i> -Hexanoic acid 7 | 250 mW | 20.48 | 0.00  | 38.18 |
| Experiment 3-2-0089 | <i>n</i> -Hexanoic acid 7 | 250 mW | 19.73 | 0.00  | 38.47 |
| Experiment 3-2-0090 | <i>n</i> -Hexanoic acid 7 | 250 mW | 19.93 | 0.00  | 38.35 |
| Experiment 3-2-0091 | <i>n</i> -Hexanoic acid 7 | 250 mW | 19.55 | 0.00  | 37.73 |
| Experiment 3-2-0092 | <i>n</i> -Hexanoic acid 7 | 250 mW | 19.67 | 0.00  | 38.11 |
| Experiment 3-2-0093 | <i>n</i> -Hexanoic acid 7 | 250 mW | 19.60 | 0.00  | 38.22 |
| Experiment 3-2-0094 | <i>n</i> -Hexanoic acid 7 | 250 mW | 19.97 | 0.00  | 38.17 |
| Experiment 3-2-0095 | <i>n</i> -Hexanoic acid 7 | 250 mW | 20.29 | 0.00  | 38.27 |
| Experiment 3-2-0096 | <i>n</i> -Hexanoic acid 7 | 250 mW | 19.29 | 0.00  | 0.00  |
| Experiment 3-2-0097 | <i>n</i> -Hexanoic acid 7 | 125 mW | 16.67 | 0.00  | 36.43 |
| Experiment 3-2-0098 | <i>n</i> -Hexanoic acid 7 | 125 mW | 17.38 | 3.86  | 37.37 |
| Experiment 3-2-0099 | <i>n</i> -Hexanoic acid 7 | 125 mW | 17.52 | 2.74  | 38.07 |
| Experiment 3-2-0100 | <i>n</i> -Hexanoic acid 7 | 125 mW | 17.43 | 0.00  | 37.79 |
| Experiment 3-2-0101 | <i>n</i> -Hexanoic acid 7 | 125 mW | 17.56 | 0.00  | 37.75 |
| Experiment 3-2-0102 | <i>n</i> -Hexanoic acid 7 | 125 mW | 17.94 | 0.00  | 38.08 |
| Experiment 3-2-0103 | <i>n</i> -Hexanoic acid 7 | 125 mW | 17.72 | 2.54  | 37.64 |
| Experiment 3-2-0104 | <i>n</i> -Hexanoic acid 7 | 125 mW | 18.02 | 0.00  | 37.74 |
| Experiment 3-2-0105 | <i>n</i> -Hexanoic acid 7 | 125 mW | 17.56 | 0.00  | 38.29 |
| Experiment 3-2-0106 | <i>n</i> -Hexanoic acid 7 | 125 mW | 17.40 | 2.80  | 38.09 |
| Experiment 3-2-0107 | <i>n</i> -Hexanoic acid 7 | 125 mW | 17.92 | 2.92  | 0.00  |
| Experiment 3-2-0108 | <i>n</i> -Hexanoic acid 7 | 125 mW | 17.78 | 3.23  | 37.29 |
| Experiment 3-2-0109 | <i>n</i> -Hexanoic acid 7 | 125 mW | 17.81 | 3.63  | 0.00  |
| Experiment 3-2-0110 | <i>n</i> -Hexanoic acid 7 | 125 mW | 16.99 | 0.00  | 36.72 |
| Experiment 3-2-0111 | <i>n</i> -Hexanoic acid 7 | 125 mW | 16.59 | 4.65  | 36.66 |
| Experiment 3-2-0112 | <i>n</i> -Hexanoic acid 7 | 125 mW | 16.37 | 6.49  | 36.05 |
| Experiment 3-2-0113 | <i>n</i> -Hexanoic acid 7 | 125 mW | 16.58 | 4.93  | 36.83 |
| Experiment 3-2-0114 | <i>n</i> -Hexanoic acid 7 | 125 mW | 17.18 | 4.43  | 37.37 |
| Experiment 3-2-0115 | <i>n</i> -Hexanoic acid 7 | 125 mW | 18.09 | 0.00  | 36.38 |
| Experiment 3-2-0116 | <i>n</i> -Hexanoic acid 7 | 125 mW | 17.77 | 2.89  | 37.69 |
| Experiment 3-2-0117 | <i>n</i> -Hexanoic acid 7 | 125 mW | 17.83 | 2.71  | 37.86 |
| Experiment 3-2-0118 | <i>n</i> -Hexanoic acid 7 | 125 mW | 17.87 | 0.00  | 38.18 |
| Experiment 3-2-0119 | <i>n</i> -Hexanoic acid 7 | 125 mW | 18.84 | 2.46  | 36.40 |
| Experiment 3-2-0120 | <i>n</i> -Hexanoic acid 7 | 125 mW | 18.18 | 2.43  | 38.04 |
| Experiment 3-2-0121 | <i>n</i> -Hexanoic acid 7 | 125 mW | 17.99 | 0.00  | 37.01 |
| Experiment 3-2-0122 | <i>n</i> -Hexanoic acid 7 | 125 mW | 17.72 | 3.10  | 36.83 |
| Experiment 3-2-0123 | <i>n</i> -Hexanoic acid 7 | 125 mW | 17.49 | 3.13  | 37.36 |
| Experiment 3-2-0124 | <i>n</i> -Hexanoic acid 7 | 125 mW | 17.04 | 3.36  | 36.76 |
| Experiment 3-2-0125 | <i>n</i> -Hexanoic acid 7 | 125 mW | 17.16 | 3.84  | 36.92 |
| Experiment 3-2-0126 | <i>n</i> -Hexanoic acid 7 | 125 mW | 0.00  | 4.46  | 35.65 |
| Experiment 3-2-0127 | <i>n</i> -Hexanoic acid 7 | 125 mW | 16.73 | 0.00  | 36.55 |
| Experiment 3-2-0128 | <i>n</i> -Hexanoic acid 7 | 125 mW | 16.09 | 5.58  | 33.72 |
| Experiment 3-2-0129 | <i>n</i> -Hexanoic acid 7 | 63 mW  | 12.16 | 23.68 | 30.23 |
| Experiment 3-2-0130 | <i>n</i> -Hexanoic acid 7 | 63 mW  | 12.37 | 21.94 | 31.66 |
| Experiment 3-2-0131 | <i>n</i> -Hexanoic acid 7 | 63 mW  | 13.99 | 18.97 | 30.46 |
| Experiment 3-2-0132 | <i>n</i> -Hexanoic acid 7 | 63 mW  | 14.92 | 18.46 | 30.82 |
| Experiment 3-2-0133 | <i>n</i> -Hexanoic acid 7 | 63 mW  | 14.55 | 19.55 | 0.00  |
| Experiment 3-2-0134 | <i>n</i> -Hexanoic acid 7 | 63 mW  | 13.40 | 18.70 | 31.97 |
| Experiment 3-2-0135 | <i>n</i> -Hexanoic acid 7 | 63 mW  | 13.25 | 19.09 | 32.58 |
| Experiment 3-2-0136 | <i>n</i> -Hexanoic acid 7 | 63 mW  | 15.81 | 16.57 | 30.68 |
| Experiment 3-2-0137 | <i>n</i> -Hexanoic acid 7 | 63 mW  | 15.38 | 16.18 | 31.15 |
| Experiment 3-2-0138 | <i>n</i> -Hexanoic acid 7 | 63 mW  | 13.75 | 18.70 | 32.34 |
| Experiment 3-2-0139 | <i>n</i> -Hexanoic acid 7 | 63 mW  | 12.99 | 19.33 | 31.17 |
| Experiment 3-2-0140 | <i>n</i> -Hexanoic acid 7 | 63 mW  | 14.67 | 18.09 | 30.21 |
| Experiment 3-2-0141 | <i>n</i> -Hexanoic acid 7 | 63 mW  | 14.01 | 19.87 | 30.53 |
| Experiment 3-2-0142 | <i>n</i> -Hexanoic acid 7 | 63 mW  | 12.48 | 20.25 | 30.57 |
| Experiment 3-2-0143 | <i>n</i> -Hexanoic acid 7 | 63 mW  | 12.89 | 20.01 | 32.10 |
| Experiment 3-2-0144 | <i>n</i> -Hexanoic acid 7 | 63 mW  | 0.00  | 22.80 | 30.13 |
| Experiment 3-2-0145 | <i>n</i> -Hexanoic acid 7 | 63 mW  | 11.58 | 23.08 | 31.31 |
| Experiment 3-2-0146 | <i>n</i> -Hexanoic acid 7 | 63 mW  | 12.52 | 21.73 | 31.75 |
| Experiment 3-2-0147 | <i>n</i> -Hexanoic acid 7 | 63 mW  | 13.32 | 19.87 | 32.24 |
| Experiment 3-2-0148 | <i>n</i> -Hexanoic acid 7 | 63 mW  | 13.42 | 19.25 | 32.46 |
| Experiment 3-2-0149 | <i>n</i> -Hexanoic acid 7 | 63 mW  | 13.83 | 18.67 | 31.64 |
| Experiment 3-2-0150 | <i>n</i> -Hexanoic acid 7 | 63 mW  | 14.16 | 18.88 | 30.89 |
| Experiment 3-2-0151 | <i>n</i> -Hexanoic acid 7 | 63 mW  | 13.56 | 19.75 | 30.62 |
| Experiment 3-2-0152 | <i>n</i> -Hexanoic acid 7 | 63 mW  | 13.35 | 19.37 | 32.35 |
| Experiment 3-2-0153 | <i>n</i> -Hexanoic acid 7 | 63 mW  | 14.30 | 18.97 | 30.27 |
| Experiment 3-2-0154 | <i>n</i> -Hexanoic acid 7 | 63 mW  | 13.13 | 19.72 | 32.21 |
| Experiment 3-2-0155 | <i>n</i> -Hexanoic acid 7 | 63 mW  | 13.32 | 19.39 | 32.18 |
| Experiment 3-2-0156 | <i>n</i> -Hexanoic acid 7 | 63 mW  | 14.35 | 19.46 | 28.94 |
| Experiment 3-2-0157 | <i>n</i> -Hexanoic acid 7 | 63 mW  | 12.93 | 19.90 | 31.47 |
| Experiment 3-2-0158 | <i>n</i> -Hexanoic acid 7 | 63 mW  | 12.37 | 20.94 | 31.33 |
| Experiment 3-2-0159 | <i>n</i> -Hexanoic acid 7 | 63 mW  | 12.31 | 21.03 | 32.23 |
| Experiment 3-2-0160 | <i>n</i> -Hexanoic acid 7 | 63 mW  | 11.72 | 22.20 | 30.84 |
| Experiment 3-2-0161 | <i>n</i> -Hexanoic acid 7 | 31 mW  | 10.20 | 30.97 | 28.65 |
| Experiment 3-2-0162 | <i>n</i> -Hexanoic acid 7 | 31 mW  | 10.55 | 30.40 | 28.95 |
| Experiment 3-2-0163 | <i>n</i> -Hexanoic acid 7 | 31 mW  | 10.89 | 27.48 | 0.00  |
| Experiment 3-2-0164 | <i>n</i> -Hexanoic acid 7 | 31 mW  | 11.11 | 27.75 | 29.86 |
| Experiment 3-2-0165 | <i>n</i> -Hexanoic acid 7 | 31 mW  | 10.74 | 24.43 | 31.71 |
| Experiment 3-2-0166 | <i>n</i> -Hexanoic acid 7 | 31 mW  | 12.57 | 26.90 | 28.69 |
| Experiment 3-2-0167 | <i>n</i> -Hexanoic acid 7 | 31 mW  | 12.38 | 26.45 | 27.99 |
| Experiment 3-2-0168 | <i>n</i> -Hexanoic acid 7 | 31 mW  | 11.35 | 0.00  | 30.61 |

|                     |                             |         |       |       |       |
|---------------------|-----------------------------|---------|-------|-------|-------|
| Experiment 3-2-0169 | <i>n</i> -Hexanoic acid 7   | 31 mW   | 11.11 | 26.90 | 0.00  |
| Experiment 3-2-0170 | <i>n</i> -Hexanoic acid 7   | 31 mW   | 11.11 | 27.27 | 29.72 |
| Experiment 3-2-0171 | <i>n</i> -Hexanoic acid 7   | 31 mW   | 10.95 | 0.00  | 28.98 |
| Experiment 3-2-0172 | <i>n</i> -Hexanoic acid 7   | 31 mW   | 10.96 | 28.10 | 29.22 |
| Experiment 3-2-0173 | <i>n</i> -Hexanoic acid 7   | 31 mW   | 10.71 | 27.88 | 28.94 |
| Experiment 3-2-0174 | <i>n</i> -Hexanoic acid 7   | 31 mW   | 10.00 | 27.15 | 29.36 |
| Experiment 3-2-0175 | <i>n</i> -Hexanoic acid 7   | 31 mW   | 10.28 | 28.87 | 29.61 |
| Experiment 3-2-0176 | <i>n</i> -Hexanoic acid 7   | 31 mW   | 9.42  | 28.67 | 29.36 |
| Experiment 3-2-0177 | <i>n</i> -Hexanoic acid 7   | 31 mW   | 9.92  | 31.76 | 0.00  |
| Experiment 3-2-0178 | <i>n</i> -Hexanoic acid 7   | 31 mW   | 10.40 | 29.67 | 29.36 |
| Experiment 3-2-0179 | <i>n</i> -Hexanoic acid 7   | 31 mW   | 10.78 | 28.86 | 28.97 |
| Experiment 3-2-0180 | <i>n</i> -Hexanoic acid 7   | 31 mW   | 10.69 | 28.04 | 29.48 |
| Experiment 3-2-0181 | <i>n</i> -Hexanoic acid 7   | 31 mW   | 10.81 | 27.65 | 30.71 |
| Experiment 3-2-0182 | <i>n</i> -Hexanoic acid 7   | 31 mW   | 11.00 | 27.53 | 29.97 |
| Experiment 3-2-0183 | <i>n</i> -Hexanoic acid 7   | 31 mW   | 11.12 | 27.96 | 0.00  |
| Experiment 3-2-0184 | <i>n</i> -Hexanoic acid 7   | 31 mW   | 11.01 | 25.68 | 30.52 |
| Experiment 3-2-0185 | <i>n</i> -Hexanoic acid 7   | 31 mW   | 11.99 | 27.75 | 0.00  |
| Experiment 3-2-0186 | <i>n</i> -Hexanoic acid 7   | 31 mW   | 10.64 | 28.19 | 29.71 |
| Experiment 3-2-0187 | <i>n</i> -Hexanoic acid 7   | 31 mW   | 11.72 | 27.86 | 27.35 |
| Experiment 3-2-0188 | <i>n</i> -Hexanoic acid 7   | 31 mW   | 11.90 | 28.58 | 27.19 |
| Experiment 3-2-0189 | <i>n</i> -Hexanoic acid 7   | 31 mW   | 0.00  | 26.73 | 25.16 |
| Experiment 3-2-0190 | <i>n</i> -Hexanoic acid 7   | 31 mW   | 9.99  | 28.95 | 28.86 |
| Experiment 3-2-0191 | <i>n</i> -Hexanoic acid 7   | 31 mW   | 9.76  | 29.25 | 29.45 |
| Experiment 3-2-0192 | <i>n</i> -Hexanoic acid 7   | 31 mW   | 9.61  | 31.93 | 0.00  |
| Experiment 3-2-0193 | Cyclohexanecarboxylic acid2 | 1000 mW | 57.2  | 0.00  | 25.8  |
| Experiment 3-2-0194 | Cyclohexanecarboxylic acid2 | 1000 mW | 56.7  | 0.00  | 24.9  |
| Experiment 3-2-0195 | Cyclohexanecarboxylic acid2 | 1000 mW | 57.4  | 0.00  | 23.2  |
| Experiment 3-2-0196 | Cyclohexanecarboxylic acid2 | 1000 mW | 57.9  | 0.00  | 23.2  |
| Experiment 3-2-0197 | Cyclohexanecarboxylic acid2 | 1000 mW | 57.8  | 0.00  | 22.8  |
| Experiment 3-2-0198 | Cyclohexanecarboxylic acid2 | 1000 mW | 57.6  | 0.00  | 24.1  |
| Experiment 3-2-0199 | Cyclohexanecarboxylic acid2 | 1000 mW | 57.8  | 0.00  | 23.3  |
| Experiment 3-2-0200 | Cyclohexanecarboxylic acid2 | 1000 mW | 57.3  | 0.00  | 23.0  |
| Experiment 3-2-0201 | Cyclohexanecarboxylic acid2 | 1000 mW | 57.8  | 0.00  | 22.7  |
| Experiment 3-2-0202 | Cyclohexanecarboxylic acid2 | 1000 mW | 57.6  | 0.00  | 23.2  |
| Experiment 3-2-0203 | Cyclohexanecarboxylic acid2 | 1000 mW | 57.4  | 0.00  | 23.0  |
| Experiment 3-2-0204 | Cyclohexanecarboxylic acid2 | 1000 mW | 56.5  | 0.00  | 23.3  |
| Experiment 3-2-0205 | Cyclohexanecarboxylic acid2 | 1000 mW | 57.4  | 0.00  | 22.9  |
| Experiment 3-2-0206 | Cyclohexanecarboxylic acid2 | 1000 mW | 57.3  | 0.00  | 22.8  |
| Experiment 3-2-0207 | Cyclohexanecarboxylic acid2 | 1000 mW | 56.4  | 0.00  | 25.0  |
| Experiment 3-2-0208 | Cyclohexanecarboxylic acid2 | 1000 mW | 55.9  | 0.00  | 25.3  |
| Experiment 3-2-0209 | Cyclohexanecarboxylic acid2 | 1000 mW | 57.3  | 0.00  | 25.1  |
| Experiment 3-2-0210 | Cyclohexanecarboxylic acid2 | 1000 mW | 56.8  | 0.00  | 24.3  |
| Experiment 3-2-0211 | Cyclohexanecarboxylic acid2 | 1000 mW | 57.9  | 0.00  | 22.8  |
| Experiment 3-2-0212 | Cyclohexanecarboxylic acid2 | 1000 mW | 58.2  | 0.00  | 24.4  |
| Experiment 3-2-0213 | Cyclohexanecarboxylic acid2 | 1000 mW | 56.4  | 0.00  | 22.8  |
| Experiment 3-2-0214 | Cyclohexanecarboxylic acid2 | 1000 mW | 58.6  | 0.00  | 22.1  |
| Experiment 3-2-0215 | Cyclohexanecarboxylic acid2 | 1000 mW | 57.6  | 0.00  | 23.5  |
| Experiment 3-2-0216 | Cyclohexanecarboxylic acid2 | 1000 mW | 57.7  | 0.00  | 23.6  |
| Experiment 3-2-0217 | Cyclohexanecarboxylic acid2 | 1000 mW | 56.5  | 0.00  | 22.9  |
| Experiment 3-2-0218 | Cyclohexanecarboxylic acid2 | 1000 mW | 55.5  | 0.00  | 23.7  |
| Experiment 3-2-0219 | Cyclohexanecarboxylic acid2 | 1000 mW | 57.4  | 0.00  | 22.9  |
| Experiment 3-2-0220 | Cyclohexanecarboxylic acid2 | 1000 mW | 58.1  | 0.00  | 23.2  |
| Experiment 3-2-0221 | Cyclohexanecarboxylic acid2 | 1000 mW | 56.7  | 0.00  | 22.6  |
| Experiment 3-2-0222 | Cyclohexanecarboxylic acid2 | 1000 mW | 56.9  | 0.00  | 24.0  |
| Experiment 3-2-0223 | Cyclohexanecarboxylic acid2 | 1000 mW | 56.8  | 0.00  | 23.5  |
| Experiment 3-2-0224 | Cyclohexanecarboxylic acid2 | 1000 mW | 57.0  | 0.00  | 24.8  |
| Experiment 3-2-0225 | Cyclohexanecarboxylic acid2 | 500 mW  | 54.5  | 0.00  | 28.4  |
| Experiment 3-2-0226 | Cyclohexanecarboxylic acid2 | 500 mW  | 54.7  | 0.00  | 27.8  |
| Experiment 3-2-0227 | Cyclohexanecarboxylic acid2 | 500 mW  | 54.5  | 0.00  | 27.8  |
| Experiment 3-2-0228 | Cyclohexanecarboxylic acid2 | 500 mW  | 56.0  | 0.00  | 24.9  |
| Experiment 3-2-0229 | Cyclohexanecarboxylic acid2 | 500 mW  | 56.4  | 0.00  | 24.3  |
| Experiment 3-2-0230 | Cyclohexanecarboxylic acid2 | 500 mW  | 55.6  | 0.00  | 26.0  |
| Experiment 3-2-0231 | Cyclohexanecarboxylic acid2 | 500 mW  | 54.1  | 0.00  | 27.9  |
| Experiment 3-2-0232 | Cyclohexanecarboxylic acid2 | 500 mW  | 54.0  | 0.00  | 27.8  |
| Experiment 3-2-0233 | Cyclohexanecarboxylic acid2 | 500 mW  | 54.8  | 0.00  | 26.1  |
| Experiment 3-2-0234 | Cyclohexanecarboxylic acid2 | 500 mW  | 53.2  | 0.00  | 28.9  |
| Experiment 3-2-0235 | Cyclohexanecarboxylic acid2 | 500 mW  | 54.2  | 0.00  | 27.4  |
| Experiment 3-2-0236 | Cyclohexanecarboxylic acid2 | 500 mW  | 56.2  | 0.00  | 24.9  |
| Experiment 3-2-0237 | Cyclohexanecarboxylic acid2 | 500 mW  | 53.9  | 0.00  | 26.9  |
| Experiment 3-2-0238 | Cyclohexanecarboxylic acid2 | 500 mW  | 54.1  | 0.00  | 27.5  |
| Experiment 3-2-0239 | Cyclohexanecarboxylic acid2 | 500 mW  | 54.2  | 0.00  | 28.1  |
| Experiment 3-2-0240 | Cyclohexanecarboxylic acid2 | 500 mW  | 54.2  | 0.00  | 28.3  |
| Experiment 3-2-0241 | Cyclohexanecarboxylic acid2 | 500 mW  | 54.3  | 0.00  | 28.4  |
| Experiment 3-2-0242 | Cyclohexanecarboxylic acid2 | 500 mW  | 54.2  | 0.00  | 27.9  |
| Experiment 3-2-0243 | Cyclohexanecarboxylic acid2 | 500 mW  | 54.5  | 0.00  | 27.6  |
| Experiment 3-2-0244 | Cyclohexanecarboxylic acid2 | 500 mW  | 56.0  | 0.00  | 25.3  |
| Experiment 3-2-0245 | Cyclohexanecarboxylic acid2 | 500 mW  | 55.6  | 0.00  | 25.5  |
| Experiment 3-2-0246 | Cyclohexanecarboxylic acid2 | 500 mW  | 56.5  | 0.00  | 25.0  |
| Experiment 3-2-0247 | Cyclohexanecarboxylic acid2 | 500 mW  | 55.2  | 0.00  | 25.4  |
| Experiment 3-2-0248 | Cyclohexanecarboxylic acid2 | 500 mW  | 54.3  | 0.00  | 27.5  |
| Experiment 3-2-0249 | Cyclohexanecarboxylic acid2 | 500 mW  | 53.9  | 0.00  | 27.5  |
| Experiment 3-2-0250 | Cyclohexanecarboxylic acid2 | 500 mW  | 55.3  | 0.00  | 26.8  |
| Experiment 3-2-0251 | Cyclohexanecarboxylic acid2 | 500 mW  | 53.7  | 0.00  | 28.1  |
| Experiment 3-2-0252 | Cyclohexanecarboxylic acid2 | 500 mW  | 55.2  | 0.00  | 25.8  |
| Experiment 3-2-0253 | Cyclohexanecarboxylic acid2 | 500 mW  | 55.0  | 0.00  | 26.8  |



|                     |                             |         |       |      |       |
|---------------------|-----------------------------|---------|-------|------|-------|
| Experiment 3-2-0339 | Cyclohexanecarboxylic acid2 | 63 mW   | 46.5  | 0.00 | 31.6  |
| Experiment 3-2-0340 | Cyclohexanecarboxylic acid2 | 63 mW   | 47.2  | 0.00 | 29.3  |
| Experiment 3-2-0341 | Cyclohexanecarboxylic acid2 | 63 mW   | 49.4  | 0.00 | 28.8  |
| Experiment 3-2-0342 | Cyclohexanecarboxylic acid2 | 63 mW   | 47.3  | 0.00 | 31.9  |
| Experiment 3-2-0343 | Cyclohexanecarboxylic acid2 | 63 mW   | 48.7  | 0.00 | 29.4  |
| Experiment 3-2-0344 | Cyclohexanecarboxylic acid2 | 63 mW   | 45.0  | 0.00 | 32.9  |
| Experiment 3-2-0345 | Cyclohexanecarboxylic acid2 | 63 mW   | 42.9  | 0.00 | 36.4  |
| Experiment 3-2-0346 | Cyclohexanecarboxylic acid2 | 63 mW   | 42.5  | 0.00 | 38.1  |
| Experiment 3-2-0347 | Cyclohexanecarboxylic acid2 | 63 mW   | 41.7  | 0.00 | 37.8  |
| Experiment 3-2-0348 | Cyclohexanecarboxylic acid2 | 63 mW   | 42.4  | 0.00 | 35.7  |
| Experiment 3-2-0349 | Cyclohexanecarboxylic acid2 | 63 mW   | 41.2  | 0.00 | 37.5  |
| Experiment 3-2-0350 | Cyclohexanecarboxylic acid2 | 63 mW   | 42.8  | 0.00 | 38.0  |
| Experiment 3-2-0351 | Cyclohexanecarboxylic acid2 | 63 mW   | 42.0  | 0.00 | 38.7  |
| Experiment 3-2-0352 | Cyclohexanecarboxylic acid2 | 63 mW   | 41.2  | 0.00 | 39.0  |
| Experiment 3-2-0353 | Cyclohexanecarboxylic acid2 | 31 mW   | 37.1  | 0.00 | 42.1  |
| Experiment 3-2-0354 | Cyclohexanecarboxylic acid2 | 31 mW   | 37.9  | 0.00 | 43.1  |
| Experiment 3-2-0355 | Cyclohexanecarboxylic acid2 | 31 mW   | 42.4  | 0.00 | 35.4  |
| Experiment 3-2-0356 | Cyclohexanecarboxylic acid2 | 31 mW   | 43.7  | 0.00 | 34.1  |
| Experiment 3-2-0357 | Cyclohexanecarboxylic acid2 | 31 mW   | 48.0  | 0.00 | 29.2  |
| Experiment 3-2-0358 | Cyclohexanecarboxylic acid2 | 31 mW   | 44.4  | 0.00 | 33.0  |
| Experiment 3-2-0359 | Cyclohexanecarboxylic acid2 | 31 mW   | 40.2  | 0.00 | 41.0  |
| Experiment 3-2-0360 | Cyclohexanecarboxylic acid2 | 31 mW   | 40.1  | 0.00 | 40.8  |
| Experiment 3-2-0361 | Cyclohexanecarboxylic acid2 | 31 mW   | 38.9  | 0.00 | 39.2  |
| Experiment 3-2-0362 | Cyclohexanecarboxylic acid2 | 31 mW   | 39.7  | 0.00 | 41.6  |
| Experiment 3-2-0363 | Cyclohexanecarboxylic acid2 | 31 mW   | 39.3  | 0.00 | 41.6  |
| Experiment 3-2-0364 | Cyclohexanecarboxylic acid2 | 31 mW   | 42.9  | 0.00 | 34.2  |
| Experiment 3-2-0365 | Cyclohexanecarboxylic acid2 | 31 mW   | 43.4  | 0.00 | 32.2  |
| Experiment 3-2-0366 | Cyclohexanecarboxylic acid2 | 31 mW   | 38.8  | 0.00 | 41.7  |
| Experiment 3-2-0367 | Cyclohexanecarboxylic acid2 | 31 mW   | 38.4  | 0.00 | 42.2  |
| Experiment 3-2-0368 | Cyclohexanecarboxylic acid2 | 31 mW   | 37.5  | 0.00 | 42.7  |
| Experiment 3-2-0369 | Cyclohexanecarboxylic acid2 | 31 mW   | 36.2  | 0.00 | 43.7  |
| Experiment 3-2-0370 | Cyclohexanecarboxylic acid2 | 31 mW   | 37.9  | 0.00 | 42.7  |
| Experiment 3-2-0371 | Cyclohexanecarboxylic acid2 | 31 mW   | 37.7  | 0.00 | 42.2  |
| Experiment 3-2-0372 | Cyclohexanecarboxylic acid2 | 31 mW   | 38.2  | 0.00 | 42.0  |
| Experiment 3-2-0373 | Cyclohexanecarboxylic acid2 | 31 mW   | 43.0  | 0.00 | 35.2  |
| Experiment 3-2-0374 | Cyclohexanecarboxylic acid2 | 31 mW   | 39.0  | 0.00 | 41.2  |
| Experiment 3-2-0375 | Cyclohexanecarboxylic acid2 | 31 mW   | 39.8  | 0.00 | 41.0  |
| Experiment 3-2-0376 | Cyclohexanecarboxylic acid2 | 31 mW   | 39.9  | 0.00 | 40.7  |
| Experiment 3-2-0377 | Cyclohexanecarboxylic acid2 | 31 mW   | 39.1  | 0.00 | 41.0  |
| Experiment 3-2-0378 | Cyclohexanecarboxylic acid2 | 31 mW   | 38.5  | 0.00 | 41.8  |
| Experiment 3-2-0379 | Cyclohexanecarboxylic acid2 | 31 mW   | 39.8  | 0.00 | 41.3  |
| Experiment 3-2-0380 | Cyclohexanecarboxylic acid2 | 31 mW   | 45.0  | 0.00 | 33.5  |
| Experiment 3-2-0381 | Cyclohexanecarboxylic acid2 | 31 mW   | 42.0  | 0.00 | 35.8  |
| Experiment 3-2-0382 | Cyclohexanecarboxylic acid2 | 31 mW   | 43.9  | 0.00 | 32.1  |
| Experiment 3-2-0383 | Cyclohexanecarboxylic acid2 | 31 mW   | 38.4  | 0.00 | 42.3  |
| Experiment 3-2-0384 | Cyclohexanecarboxylic acid2 | 31 mW   | 37.2  | 0.00 | 43.3  |
| Experiment 3-2-0385 | <i>N</i> -Boc-L-proline 9   | 1000 mW | 50.04 | 0.00 | 27.61 |
| Experiment 3-2-0386 | <i>N</i> -Boc-L-proline 9   | 1000 mW | 49.65 | 0.00 | 27.55 |
| Experiment 3-2-0387 | <i>N</i> -Boc-L-proline 9   | 1000 mW | 51.13 | 0.00 | 24.55 |
| Experiment 3-2-0388 | <i>N</i> -Boc-L-proline 9   | 1000 mW | 51.63 | 0.00 | 25.47 |
| Experiment 3-2-0389 | <i>N</i> -Boc-L-proline 9   | 1000 mW | 46.36 | 0.00 | 27.64 |
| Experiment 3-2-0390 | <i>N</i> -Boc-L-proline 9   | 1000 mW | 50.28 | 0.00 | 25.66 |
| Experiment 3-2-0391 | <i>N</i> -Boc-L-proline 9   | 1000 mW | 52.60 | 0.00 | 23.35 |
| Experiment 3-2-0392 | <i>N</i> -Boc-L-proline 9   | 1000 mW | 51.84 | 0.00 | 24.11 |
| Experiment 3-2-0393 | <i>N</i> -Boc-L-proline 9   | 1000 mW | 51.30 | 0.00 | 23.65 |
| Experiment 3-2-0394 | <i>N</i> -Boc-L-proline 9   | 1000 mW | 51.17 | 0.00 | 24.74 |
| Experiment 3-2-0395 | <i>N</i> -Boc-L-proline 9   | 1000 mW | 49.50 | 0.00 | 25.41 |
| Experiment 3-2-0396 | <i>N</i> -Boc-L-proline 9   | 1000 mW | 51.29 | 0.00 | 23.91 |
| Experiment 3-2-0397 | <i>N</i> -Boc-L-proline 9   | 1000 mW | 50.31 | 0.00 | 25.18 |
| Experiment 3-2-0398 | <i>N</i> -Boc-L-proline 9   | 1000 mW | 54.01 | 0.00 | 22.22 |
| Experiment 3-2-0399 | <i>N</i> -Boc-L-proline 9   | 1000 mW | 52.27 | 0.00 | 23.32 |
| Experiment 3-2-0400 | <i>N</i> -Boc-L-proline 9   | 1000 mW | 51.04 | 0.00 | 25.97 |
| Experiment 3-2-0401 | <i>N</i> -Boc-L-proline 9   | 1000 mW | 49.57 | 0.00 | 27.29 |
| Experiment 3-2-0402 | <i>N</i> -Boc-L-proline 9   | 1000 mW | 48.71 | 0.00 | 27.58 |
| Experiment 3-2-0403 | <i>N</i> -Boc-L-proline 9   | 1000 mW | 51.21 | 0.00 | 25.39 |
| Experiment 3-2-0404 | <i>N</i> -Boc-L-proline 9   | 1000 mW | 50.20 | 0.00 | 25.73 |
| Experiment 3-2-0405 | <i>N</i> -Boc-L-proline 9   | 1000 mW | 51.46 | 0.00 | 23.98 |
| Experiment 3-2-0406 | <i>N</i> -Boc-L-proline 9   | 1000 mW | 48.88 | 0.00 | 27.05 |
| Experiment 3-2-0407 | <i>N</i> -Boc-L-proline 9   | 1000 mW | 50.67 | 0.00 | 25.13 |
| Experiment 3-2-0408 | <i>N</i> -Boc-L-proline 9   | 1000 mW | 49.58 | 0.00 | 25.64 |
| Experiment 3-2-0409 | <i>N</i> -Boc-L-proline 9   | 1000 mW | 49.74 | 0.00 | 25.73 |
| Experiment 3-2-0410 | <i>N</i> -Boc-L-proline 9   | 1000 mW | 50.08 | 0.00 | 25.38 |
| Experiment 3-2-0411 | <i>N</i> -Boc-L-proline 9   | 1000 mW | 47.39 | 0.00 | 27.89 |
| Experiment 3-2-0412 | <i>N</i> -Boc-L-proline 9   | 1000 mW | 52.13 | 0.00 | 22.83 |
| Experiment 3-2-0413 | <i>N</i> -Boc-L-proline 9   | 1000 mW | 45.79 | 0.00 | 29.19 |
| Experiment 3-2-0414 | <i>N</i> -Boc-L-proline 9   | 1000 mW | 51.77 | 0.00 | 23.81 |
| Experiment 3-2-0415 | <i>N</i> -Boc-L-proline 9   | 1000 mW | 52.51 | 0.00 | 23.27 |
| Experiment 3-2-0416 | <i>N</i> -Boc-L-proline 9   | 1000 mW | 50.44 | 0.00 | 25.87 |
| Experiment 3-2-0417 | <i>N</i> -Boc-L-proline 9   | 500 mW  | 50.34 | 0.00 | 29.37 |
| Experiment 3-2-0418 | <i>N</i> -Boc-L-proline 9   | 500 mW  | 49.60 | 0.00 | 29.52 |
| Experiment 3-2-0419 | <i>N</i> -Boc-L-proline 9   | 500 mW  | 50.52 | 0.00 | 28.69 |
| Experiment 3-2-0420 | <i>N</i> -Boc-L-proline 9   | 500 mW  | 50.80 | 0.00 | 29.59 |
| Experiment 3-2-0421 | <i>N</i> -Boc-L-proline 9   | 500 mW  | 50.97 | 0.00 | 28.75 |
| Experiment 3-2-0422 | <i>N</i> -Boc-L-proline 9   | 500 mW  | 51.35 | 0.00 | 28.69 |
| Experiment 3-2-0423 | <i>N</i> -Boc-L-proline 9   | 500 mW  | 51.81 | 0.00 | 28.29 |

|                     |                   |        |       |      |       |
|---------------------|-------------------|--------|-------|------|-------|
| Experiment 3-2-0424 | N-Boc-L-proline 9 | 500 mW | 40.17 | 0.00 | 35.04 |
| Experiment 3-2-0425 | N-Boc-L-proline 9 | 500 mW | 51.96 | 0.00 | 26.98 |
| Experiment 3-2-0426 | N-Boc-L-proline 9 | 500 mW | 51.10 | 0.00 | 28.78 |
| Experiment 3-2-0427 | N-Boc-L-proline 9 | 500 mW | 43.22 | 0.00 | 33.57 |
| Experiment 3-2-0428 | N-Boc-L-proline 9 | 500 mW | 51.28 | 0.00 | 28.64 |
| Experiment 3-2-0429 | N-Boc-L-proline 9 | 500 mW | 51.71 | 0.00 | 28.63 |
| Experiment 3-2-0430 | N-Boc-L-proline 9 | 500 mW | 48.48 | 0.00 | 31.04 |
| Experiment 3-2-0431 | N-Boc-L-proline 9 | 500 mW | 51.77 | 0.00 | 28.22 |
| Experiment 3-2-0432 | N-Boc-L-proline 9 | 500 mW | 49.31 | 0.00 | 29.78 |
| Experiment 3-2-0433 | N-Boc-L-proline 9 | 500 mW | 50.97 | 0.00 | 29.10 |
| Experiment 3-2-0434 | N-Boc-L-proline 9 | 500 mW | 49.25 | 0.00 | 29.63 |
| Experiment 3-2-0435 | N-Boc-L-proline 9 | 500 mW | 52.46 | 0.00 | 26.79 |
| Experiment 3-2-0436 | N-Boc-L-proline 9 | 500 mW | 50.22 | 0.00 | 27.32 |
| Experiment 3-2-0437 | N-Boc-L-proline 9 | 500 mW | 53.43 | 0.00 | 25.01 |
| Experiment 3-2-0438 | N-Boc-L-proline 9 | 500 mW | 50.83 | 0.00 | 29.03 |
| Experiment 3-2-0439 | N-Boc-L-proline 9 | 500 mW | 50.98 | 0.00 | 28.88 |
| Experiment 3-2-0440 | N-Boc-L-proline 9 | 500 mW | 50.16 | 0.00 | 29.38 |
| Experiment 3-2-0441 | N-Boc-L-proline 9 | 500 mW | 46.68 | 0.00 | 29.92 |
| Experiment 3-2-0442 | N-Boc-L-proline 9 | 500 mW | 50.35 | 0.00 | 29.32 |
| Experiment 3-2-0443 | N-Boc-L-proline 9 | 500 mW | 50.18 | 0.00 | 30.18 |
| Experiment 3-2-0444 | N-Boc-L-proline 9 | 500 mW | 50.45 | 0.00 | 28.83 |
| Experiment 3-2-0445 | N-Boc-L-proline 9 | 500 mW | 49.81 | 0.00 | 29.29 |
| Experiment 3-2-0446 | N-Boc-L-proline 9 | 500 mW | 46.85 | 0.00 | 31.14 |
| Experiment 3-2-0447 | N-Boc-L-proline 9 | 500 mW | 45.93 | 0.00 | 31.92 |
| Experiment 3-2-0448 | N-Boc-L-proline 9 | 500 mW | 50.85 | 0.00 | 30.26 |
| Experiment 3-2-0449 | N-Boc-L-proline 9 | 250 mW | 47.55 | 0.00 | 34.59 |
| Experiment 3-2-0450 | N-Boc-L-proline 9 | 250 mW | 47.36 | 0.00 | 34.73 |
| Experiment 3-2-0451 | N-Boc-L-proline 9 | 250 mW | 48.85 | 0.00 | 32.52 |
| Experiment 3-2-0452 | N-Boc-L-proline 9 | 250 mW | 47.33 | 0.00 | 33.96 |
| Experiment 3-2-0453 | N-Boc-L-proline 9 | 250 mW | 47.68 | 0.00 | 34.07 |
| Experiment 3-2-0454 | N-Boc-L-proline 9 | 250 mW | 48.29 | 0.00 | 33.72 |
| Experiment 3-2-0455 | N-Boc-L-proline 9 | 250 mW | 47.12 | 0.00 | 34.60 |
| Experiment 3-2-0456 | N-Boc-L-proline 9 | 250 mW | 48.19 | 0.00 | 33.65 |
| Experiment 3-2-0457 | N-Boc-L-proline 9 | 250 mW | 50.32 | 0.00 | 31.35 |
| Experiment 3-2-0458 | N-Boc-L-proline 9 | 250 mW | 48.39 | 0.00 | 33.28 |
| Experiment 3-2-0459 | N-Boc-L-proline 9 | 250 mW | 47.61 | 0.00 | 33.28 |
| Experiment 3-2-0460 | N-Boc-L-proline 9 | 250 mW | 48.64 | 0.00 | 33.41 |
| Experiment 3-2-0461 | N-Boc-L-proline 9 | 250 mW | 50.16 | 0.00 | 31.49 |
| Experiment 3-2-0462 | N-Boc-L-proline 9 | 250 mW | 48.13 | 0.00 | 33.67 |
| Experiment 3-2-0463 | N-Boc-L-proline 9 | 250 mW | 48.29 | 0.00 | 33.18 |
| Experiment 3-2-0464 | N-Boc-L-proline 9 | 250 mW | 49.62 | 0.00 | 33.52 |
| Experiment 3-2-0465 | N-Boc-L-proline 9 | 250 mW | 46.96 | 0.00 | 34.75 |
| Experiment 3-2-0466 | N-Boc-L-proline 9 | 250 mW | 47.18 | 0.00 | 34.73 |
| Experiment 3-2-0467 | N-Boc-L-proline 9 | 250 mW | 50.38 | 0.00 | 32.09 |
| Experiment 3-2-0468 | N-Boc-L-proline 9 | 250 mW | 47.45 | 0.00 | 33.76 |
| Experiment 3-2-0469 | N-Boc-L-proline 9 | 250 mW | 50.60 | 0.00 | 30.40 |
| Experiment 3-2-0470 | N-Boc-L-proline 9 | 250 mW | 48.37 | 0.00 | 33.51 |
| Experiment 3-2-0471 | N-Boc-L-proline 9 | 250 mW | 47.59 | 0.00 | 33.92 |
| Experiment 3-2-0472 | N-Boc-L-proline 9 | 250 mW | 47.96 | 0.00 | 33.84 |
| Experiment 3-2-0473 | N-Boc-L-proline 9 | 250 mW | 49.19 | 0.00 | 32.24 |
| Experiment 3-2-0474 | N-Boc-L-proline 9 | 250 mW | 47.46 | 0.00 | 33.37 |
| Experiment 3-2-0475 | N-Boc-L-proline 9 | 250 mW | 49.88 | 0.00 | 33.23 |
| Experiment 3-2-0476 | N-Boc-L-proline 9 | 250 mW | 48.04 | 0.00 | 33.43 |
| Experiment 3-2-0477 | N-Boc-L-proline 9 | 250 mW | 49.37 | 0.00 | 31.71 |
| Experiment 3-2-0478 | N-Boc-L-proline 9 | 250 mW | 39.92 | 0.00 | 37.77 |
| Experiment 3-2-0479 | N-Boc-L-proline 9 | 250 mW | 50.07 | 0.00 | 31.27 |
| Experiment 3-2-0480 | N-Boc-L-proline 9 | 250 mW | 49.79 | 0.00 | 33.66 |
| Experiment 3-2-0481 | N-Boc-L-proline 9 | 125 mW | 46.79 | 0.00 | 35.39 |
| Experiment 3-2-0482 | N-Boc-L-proline 9 | 125 mW | 47.97 | 0.00 | 34.89 |
| Experiment 3-2-0483 | N-Boc-L-proline 9 | 125 mW | 47.64 | 0.00 | 34.48 |
| Experiment 3-2-0484 | N-Boc-L-proline 9 | 125 mW | 48.09 | 0.00 | 34.67 |
| Experiment 3-2-0485 | N-Boc-L-proline 9 | 125 mW | 48.09 | 0.00 | 34.35 |
| Experiment 3-2-0486 | N-Boc-L-proline 9 | 125 mW | 47.69 | 0.00 | 34.36 |
| Experiment 3-2-0487 | N-Boc-L-proline 9 | 125 mW | 49.30 | 0.00 | 32.84 |
| Experiment 3-2-0488 | N-Boc-L-proline 9 | 125 mW | 48.21 | 0.00 | 34.12 |
| Experiment 3-2-0489 | N-Boc-L-proline 9 | 125 mW | 48.20 | 0.00 | 34.92 |
| Experiment 3-2-0490 | N-Boc-L-proline 9 | 125 mW | 48.02 | 0.00 | 34.46 |
| Experiment 3-2-0491 | N-Boc-L-proline 9 | 125 mW | 48.99 | 0.00 | 34.35 |
| Experiment 3-2-0492 | N-Boc-L-proline 9 | 125 mW | 48.44 | 0.00 | 33.46 |
| Experiment 3-2-0493 | N-Boc-L-proline 9 | 125 mW | 48.12 | 0.00 | 32.80 |
| Experiment 3-2-0494 | N-Boc-L-proline 9 | 125 mW | 47.02 | 0.00 | 35.36 |
| Experiment 3-2-0495 | N-Boc-L-proline 9 | 125 mW | 47.18 | 0.00 | 34.81 |
| Experiment 3-2-0496 | N-Boc-L-proline 9 | 125 mW | 47.56 | 0.00 | 34.84 |
| Experiment 3-2-0497 | N-Boc-L-proline 9 | 125 mW | 49.12 | 0.00 | 34.01 |
| Experiment 3-2-0498 | N-Boc-L-proline 9 | 125 mW | 48.20 | 0.00 | 34.50 |
| Experiment 3-2-0499 | N-Boc-L-proline 9 | 125 mW | 47.96 | 0.00 | 34.49 |
| Experiment 3-2-0500 | N-Boc-L-proline 9 | 125 mW | 47.92 | 0.00 | 34.18 |
| Experiment 3-2-0501 | N-Boc-L-proline 9 | 125 mW | 50.10 | 0.00 | 30.94 |
| Experiment 3-2-0502 | N-Boc-L-proline 9 | 125 mW | 48.44 | 0.00 | 34.32 |
| Experiment 3-2-0503 | N-Boc-L-proline 9 | 125 mW | 47.78 | 0.00 | 34.85 |
| Experiment 3-2-0504 | N-Boc-L-proline 9 | 125 mW | 50.01 | 0.00 | 33.77 |
| Experiment 3-2-0505 | N-Boc-L-proline 9 | 125 mW | 48.90 | 0.00 | 33.16 |
| Experiment 3-2-0506 | N-Boc-L-proline 9 | 125 mW | 47.71 | 0.00 | 34.31 |
| Experiment 3-2-0507 | N-Boc-L-proline 9 | 125 mW | 49.44 | 0.00 | 33.48 |
| Experiment 3-2-0508 | N-Boc-L-proline 9 | 125 mW | 47.02 | 0.00 | 35.24 |

|                     |                                  |        |       |      |       |
|---------------------|----------------------------------|--------|-------|------|-------|
| Experiment 3-2-0509 | <i>N</i> -Boc-L-proline <b>9</b> | 125 mW | 47.58 | 0.00 | 34.74 |
| Experiment 3-2-0510 | <i>N</i> -Boc-L-proline <b>9</b> | 125 mW | 47.91 | 0.00 | 34.35 |
| Experiment 3-2-0511 | <i>N</i> -Boc-L-proline <b>9</b> | 125 mW | 48.82 | 0.00 | 34.43 |
| Experiment 3-2-0512 | <i>N</i> -Boc-L-proline <b>9</b> | 125 mW | 49.09 | 0.00 | 35.02 |
| Experiment 3-2-0513 | <i>N</i> -Boc-L-proline <b>9</b> | 63 mW  | 44.96 | 0.00 | 36.49 |
| Experiment 3-2-0514 | <i>N</i> -Boc-L-proline <b>9</b> | 63 mW  | 44.48 | 0.00 | 34.73 |
| Experiment 3-2-0515 | <i>N</i> -Boc-L-proline <b>9</b> | 63 mW  | 51.31 | 0.00 | 32.87 |
| Experiment 3-2-0516 | <i>N</i> -Boc-L-proline <b>9</b> | 63 mW  | 45.95 | 0.00 | 36.22 |
| Experiment 3-2-0517 | <i>N</i> -Boc-L-proline <b>9</b> | 63 mW  | 48.92 | 0.00 | 33.77 |
| Experiment 3-2-0518 | <i>N</i> -Boc-L-proline <b>9</b> | 63 mW  | 51.02 | 0.00 | 33.18 |
| Experiment 3-2-0519 | <i>N</i> -Boc-L-proline <b>9</b> | 63 mW  | 46.89 | 0.00 | 35.78 |
| Experiment 3-2-0520 | <i>N</i> -Boc-L-proline <b>9</b> | 63 mW  | 46.90 | 0.00 | 35.47 |
| Experiment 3-2-0521 | <i>N</i> -Boc-L-proline <b>9</b> | 63 mW  | 48.29 | 0.00 | 34.68 |
| Experiment 3-2-0522 | <i>N</i> -Boc-L-proline <b>9</b> | 63 mW  | 48.25 | 0.00 | 35.39 |
| Experiment 3-2-0523 | <i>N</i> -Boc-L-proline <b>9</b> | 63 mW  | 46.74 | 0.00 | 35.76 |
| Experiment 3-2-0524 | <i>N</i> -Boc-L-proline <b>9</b> | 63 mW  | 47.30 | 0.00 | 34.78 |
| Experiment 3-2-0525 | <i>N</i> -Boc-L-proline <b>9</b> | 63 mW  | 49.05 | 0.00 | 33.94 |
| Experiment 3-2-0526 | <i>N</i> -Boc-L-proline <b>9</b> | 63 mW  | 46.50 | 0.00 | 35.14 |
| Experiment 3-2-0527 | <i>N</i> -Boc-L-proline <b>9</b> | 63 mW  | 47.27 | 0.00 | 35.12 |
| Experiment 3-2-0528 | <i>N</i> -Boc-L-proline <b>9</b> | 63 mW  | 49.15 | 0.00 | 33.08 |
| Experiment 3-2-0529 | <i>N</i> -Boc-L-proline <b>9</b> | 63 mW  | 44.35 | 0.00 | 37.01 |
| Experiment 3-2-0530 | <i>N</i> -Boc-L-proline <b>9</b> | 63 mW  | 44.26 | 0.00 | 35.00 |
| Experiment 3-2-0531 | <i>N</i> -Boc-L-proline <b>9</b> | 63 mW  | 49.20 | 0.00 | 34.46 |
| Experiment 3-2-0532 | <i>N</i> -Boc-L-proline <b>9</b> | 63 mW  | 47.52 | 0.00 | 35.09 |
| Experiment 3-2-0533 | <i>N</i> -Boc-L-proline <b>9</b> | 63 mW  | 48.96 | 0.00 | 33.96 |
| Experiment 3-2-0534 | <i>N</i> -Boc-L-proline <b>9</b> | 63 mW  | 46.79 | 0.00 | 36.18 |
| Experiment 3-2-0535 | <i>N</i> -Boc-L-proline <b>9</b> | 63 mW  | 47.34 | 0.00 | 35.94 |
| Experiment 3-2-0536 | <i>N</i> -Boc-L-proline <b>9</b> | 63 mW  | 47.75 | 0.00 | 35.77 |
| Experiment 3-2-0537 | <i>N</i> -Boc-L-proline <b>9</b> | 63 mW  | 48.29 | 0.00 | 35.53 |
| Experiment 3-2-0538 | <i>N</i> -Boc-L-proline <b>9</b> | 63 mW  | 46.34 | 0.00 | 36.49 |
| Experiment 3-2-0539 | <i>N</i> -Boc-L-proline <b>9</b> | 63 mW  | 46.38 | 0.00 | 36.32 |
| Experiment 3-2-0540 | <i>N</i> -Boc-L-proline <b>9</b> | 63 mW  | 35.78 | 0.00 | 31.73 |
| Experiment 3-2-0541 | <i>N</i> -Boc-L-proline <b>9</b> | 63 mW  | 48.79 | 0.00 | 33.89 |
| Experiment 3-2-0542 | <i>N</i> -Boc-L-proline <b>9</b> | 63 mW  | 46.66 | 0.00 | 36.04 |
| Experiment 3-2-0543 | <i>N</i> -Boc-L-proline <b>9</b> | 63 mW  | 47.26 | 0.00 | 34.94 |
| Experiment 3-2-0544 | <i>N</i> -Boc-L-proline <b>9</b> | 63 mW  | 45.93 | 0.00 | 35.59 |
| Experiment 3-2-0545 | <i>N</i> -Boc-L-proline <b>9</b> | 31 mW  | 44.77 | 0.00 | 30.78 |
| Experiment 3-2-0546 | <i>N</i> -Boc-L-proline <b>9</b> | 31 mW  | 45.12 | 0.00 | 31.96 |
| Experiment 3-2-0547 | <i>N</i> -Boc-L-proline <b>9</b> | 31 mW  | 45.15 | 0.00 | 31.47 |
| Experiment 3-2-0548 | <i>N</i> -Boc-L-proline <b>9</b> | 31 mW  | 46.65 | 0.00 | 31.22 |
| Experiment 3-2-0549 | <i>N</i> -Boc-L-proline <b>9</b> | 31 mW  | 40.84 | 0.00 | 28.44 |
| Experiment 3-2-0550 | <i>N</i> -Boc-L-proline <b>9</b> | 31 mW  | 45.71 | 0.00 | 32.55 |
| Experiment 3-2-0551 | <i>N</i> -Boc-L-proline <b>9</b> | 31 mW  | 43.88 | 0.00 | 27.66 |
| Experiment 3-2-0552 | <i>N</i> -Boc-L-proline <b>9</b> | 31 mW  | 45.25 | 0.00 | 31.78 |
| Experiment 3-2-0553 | <i>N</i> -Boc-L-proline <b>9</b> | 31 mW  | 47.11 | 0.00 | 30.96 |
| Experiment 3-2-0554 | <i>N</i> -Boc-L-proline <b>9</b> | 31 mW  | 45.76 | 0.00 | 31.57 |
| Experiment 3-2-0555 | <i>N</i> -Boc-L-proline <b>9</b> | 31 mW  | 47.26 | 0.00 | 0.00  |
| Experiment 3-2-0556 | <i>N</i> -Boc-L-proline <b>9</b> | 31 mW  | 50.89 | 0.00 | 28.74 |
| Experiment 3-2-0557 | <i>N</i> -Boc-L-proline <b>9</b> | 31 mW  | 48.40 | 0.00 | 30.18 |
| Experiment 3-2-0558 | <i>N</i> -Boc-L-proline <b>9</b> | 31 mW  | 51.11 | 0.00 | 28.87 |
| Experiment 3-2-0559 | <i>N</i> -Boc-L-proline <b>9</b> | 31 mW  | 49.56 | 0.00 | 28.15 |
| Experiment 3-2-0560 | <i>N</i> -Boc-L-proline <b>9</b> | 31 mW  | 45.40 | 0.00 | 29.89 |
| Experiment 3-2-0561 | <i>N</i> -Boc-L-proline <b>9</b> | 31 mW  | 44.50 | 0.00 | 30.39 |
| Experiment 3-2-0562 | <i>N</i> -Boc-L-proline <b>9</b> | 31 mW  | 45.17 | 0.00 | 31.01 |
| Experiment 3-2-0563 | <i>N</i> -Boc-L-proline <b>9</b> | 31 mW  | 49.13 | 0.00 | 28.94 |
| Experiment 3-2-0564 | <i>N</i> -Boc-L-proline <b>9</b> | 31 mW  | 45.77 | 0.00 | 27.11 |
| Experiment 3-2-0565 | <i>N</i> -Boc-L-proline <b>9</b> | 31 mW  | 44.67 | 0.00 | 32.48 |
| Experiment 3-2-0566 | <i>N</i> -Boc-L-proline <b>9</b> | 31 mW  | 45.98 | 0.00 | 32.03 |
| Experiment 3-2-0567 | <i>N</i> -Boc-L-proline <b>9</b> | 31 mW  | 46.43 | 0.00 | 32.33 |
| Experiment 3-2-0568 | <i>N</i> -Boc-L-proline <b>9</b> | 31 mW  | 46.42 | 0.00 | 32.11 |
| Experiment 3-2-0569 | <i>N</i> -Boc-L-proline <b>9</b> | 31 mW  | 44.90 | 0.00 | 32.87 |
| Experiment 3-2-0570 | <i>N</i> -Boc-L-proline <b>9</b> | 31 mW  | 45.98 | 0.00 | 31.79 |
| Experiment 3-2-0571 | <i>N</i> -Boc-L-proline <b>9</b> | 31 mW  | 46.61 | 0.00 | 31.28 |
| Experiment 3-2-0572 | <i>N</i> -Boc-L-proline <b>9</b> | 31 mW  | 45.69 | 0.00 | 31.29 |
| Experiment 3-2-0573 | <i>N</i> -Boc-L-proline <b>9</b> | 31 mW  | 44.63 | 0.00 | 32.58 |
| Experiment 3-2-0574 | <i>N</i> -Boc-L-proline <b>9</b> | 31 mW  | 46.05 | 0.00 | 30.35 |
| Experiment 3-2-0575 | <i>N</i> -Boc-L-proline <b>9</b> | 31 mW  | 49.27 | 0.00 | 27.59 |
| Experiment 3-2-0576 | <i>N</i> -Boc-L-proline <b>9</b> | 31 mW  | 45.25 | 0.00 | 28.76 |
