# Supplementary material for: Development of a high intensity parallel photoreactor for high throughput screening
Source: Royal Society of Chemistry journal article supplement (doi:10.1039/d1re00317h), 2021-11-17
Supplement: d1re00317h3.pdf [file d1re00317h3.pdf]

| Sample Name         | Acid                      | Ir(dF-Me-ppy) <sub>2</sub> (dtbbpy)(PF <sub>6</sub> ) (mol%) | NiCl <sub>2</sub> glyme (mol%) | Measured Optical Power | Product LCAP | Unreacted S1 LCAP | Protodehalogenation Side Product LCAP | Phenol Side Product LCAP | BTMG-adduct Side Product LCAP | Acid-adduct Side Product LCAP |
|---------------------|---------------------------|--------------------------------------------------------------|--------------------------------|------------------------|--------------|-------------------|---------------------------------------|--------------------------|-------------------------------|-------------------------------|
| Experiment 3-3-0001 | <i>n</i> -Hexanoic acid 7 | 0.03                                                         | 0.04                           | 1000 mW                | 0.3          | 9.2               | 49.4                                  | 0.7                      | 0.4                           | 0.0                           |
| Experiment 3-3-0002 | <i>n</i> -Hexanoic acid 7 | 0.03                                                         | 0.08                           | 1000 mW                | 0.3          | 23.2              | 40.2                                  | 0.6                      | 0.7                           | 0.0                           |
| Experiment 3-3-0003 | <i>n</i> -Hexanoic acid 7 | 0.03                                                         | 0.16                           | 1000 mW                | 2.2          | 0.3               | 53.2                                  | 1.0                      | 1.3                           | 0.0                           |
| Experiment 3-3-0004 | <i>n</i> -Hexanoic acid 7 | 0.03                                                         | 0.31                           | 1000 mW                | 2.9          | 0.2               | 54.3                                  | 1.3                      | 3.2                           | 1.0                           |
| Experiment 3-3-0005 | <i>n</i> -Hexanoic acid 7 | 0.03                                                         | 0.63                           | 1000 mW                | 8.3          | 2.9               | 46.2                                  | 1.1                      | 5.9                           | 3.0                           |
| Experiment 3-3-0006 | <i>n</i> -Hexanoic acid 7 | 0.03                                                         | 1.25                           | 1000 mW                | 13.9         | 0.0               | 43.2                                  | 1.8                      | 11.0                          | 4.7                           |
| Experiment 3-3-0007 | <i>n</i> -Hexanoic acid 7 | 0.03                                                         | 2.5                            | 1000 mW                | 18.3         | 0.0               | 40.6                                  | 1.5                      | 13.2                          | 6.4                           |
| Experiment 3-3-0008 | <i>n</i> -Hexanoic acid 7 | 0.03                                                         | 5                              | 1000 mW                | 19.8         | 0.2               | 35.1                                  | 0.7                      | 9.9                           | 11.8                          |
| Experiment 3-3-0009 | <i>n</i> -Hexanoic acid 7 | 0.03                                                         | 10                             | 1000 mW                | 18.9         | 0.0               | 37.1                                  | 1.0                      | 12.0                          | 13.7                          |
| Experiment 3-3-0010 | <i>n</i> -Hexanoic acid 7 | 0.03                                                         | 20                             | 1000 mW                | 15.5         | 0.0               | 34.9                                  | 1.2                      | 10.2                          | 19.1                          |
| Experiment 3-3-0011 | <i>n</i> -Hexanoic acid 7 | 0.06                                                         | 0.04                           | 1000 mW                | 0.5          | 8.8               | 50.1                                  | 0.8                      | 0.4                           | 0.0                           |
| Experiment 3-3-0012 | <i>n</i> -Hexanoic acid 7 | 0.06                                                         | 0.08                           | 1000 mW                | 0.4          | 7.6               | 51.6                                  | 0.9                      | 0.7                           | 0.0                           |
| Experiment 3-3-0013 | <i>n</i> -Hexanoic acid 7 | 0.06                                                         | 0.16                           | 1000 mW                | 1.1          | 6.0               | 51.3                                  | 1.0                      | 1.5                           | 0.0                           |
| Experiment 3-3-0014 | <i>n</i> -Hexanoic acid 7 | 0.06                                                         | 0.31                           | 1000 mW                | 5.0          | 0.9               | 49.4                                  | 2.0                      | 3.7                           | 4.3                           |
| Experiment 3-3-0015 | <i>n</i> -Hexanoic acid 7 | 0.06                                                         | 0.63                           | 1000 mW                | 6.9          | 1.0               | 47.0                                  | 2.5                      | 7.5                           | 4.2                           |
| Experiment 3-3-0016 | <i>n</i> -Hexanoic acid 7 | 0.06                                                         | 1.25                           | 1000 mW                | 12.1         | 3.3               | 38.5                                  | 2.0                      | 8.7                           | 9.8                           |
| Experiment 3-3-0017 | <i>n</i> -Hexanoic acid 7 | 0.06                                                         | 2.5                            | 1000 mW                | 15.4         | 1.1               | 36.0                                  | 1.5                      | 10.1                          | 13.5                          |
| Experiment 3-3-0018 | <i>n</i> -Hexanoic acid 7 | 0.06                                                         | 5                              | 1000 mW                | 17.2         | 0.1               | 38.4                                  | 2.3                      | 13.3                          | 11.1                          |
| Experiment 3-3-0019 | <i>n</i> -Hexanoic acid 7 | 0.06                                                         | 10                             | 1000 mW                | 14.8         | 0.0               | 30.2                                  | 2.0                      | 9.4                           | 22.5                          |
| Experiment 3-3-0020 | <i>n</i> -Hexanoic acid 7 | 0.06                                                         | 20                             | 1000 mW                | 8.4          | 0.5               | 20.5                                  | 3.1                      | 5.8                           | 33.5                          |
| Experiment 3-3-0021 | <i>n</i> -Hexanoic acid 7 | 0.13                                                         | 0.04                           | 1000 mW                | 0.3          | 18.6              | 44.6                                  | 0.8                      | 0.6                           | 0.0                           |
| Experiment 3-3-0022 | <i>n</i> -Hexanoic acid 7 | 0.13                                                         | 0.08                           | 1000 mW                | 0.8          | 11.9              | 48.2                                  | 1.2                      | 1.4                           | 2.0                           |
| Experiment 3-3-0023 | <i>n</i> -Hexanoic acid 7 | 0.13                                                         | 0.16                           | 1000 mW                | 2.9          | 14.5              | 43.3                                  | 1.9                      | 2.7                           | 4.2                           |
| Experiment 3-3-0024 | <i>n</i> -Hexanoic acid 7 | 0.13                                                         | 0.31                           | 1000 mW                | 3.5          | 7.3               | 48.1                                  | 2.8                      | 3.7                           | 2.6                           |
| Experiment 3-3-0025 | <i>n</i> -Hexanoic acid 7 | 0.13                                                         | 0.63                           | 1000 mW                | 7.6          | 5.2               | 43.9                                  | 3.6                      | 6.9                           | 6.7                           |
| Experiment 3-3-0026 | <i>n</i> -Hexanoic acid 7 | 0.13                                                         | 1.25                           | 1000 mW                | 11.8         | 3.8               | 39.3                                  | 2.7                      | 8.9                           | 11.6                          |
| Experiment 3-3-0027 | <i>n</i> -Hexanoic acid 7 | 0.13                                                         | 2.5                            | 1000 mW                | 14.2         | 0.2               | 36.7                                  | 2.9                      | 10.3                          | 16.3                          |
| Experiment 3-3-0028 | <i>n</i> -Hexanoic acid 7 | 0.13                                                         | 5                              | 1000 mW                | 14.8         | 0.1               | 34.1                                  | 2.1                      | 10.0                          | 19.1                          |
| Experiment 3-3-0029 | <i>n</i> -Hexanoic acid 7 | 0.13                                                         | 10                             | 1000 mW                | 12.0         | 0.2               | 29.2                                  | 2.9                      | 7.8                           | 25.1                          |
| Experiment 3-3-0030 | <i>n</i> -Hexanoic acid 7 | 0.13                                                         | 20                             | 1000 mW                | 10.6         | 0.0               | 29.2                                  | 3.0                      | 10.1                          | 25.4                          |
| Experiment 3-3-0031 | <i>n</i> -Hexanoic acid 7 | 0.25                                                         | 0.04                           | 1000 mW                | 0.3          | 16.2              | 46.3                                  | 0.0                      | 0.6                           | 0.0                           |
| Experiment 3-3-0032 | <i>n</i> -Hexanoic acid 7 | 0.25                                                         | 0.08                           | 1000 mW                | 0.3          | 14.7              | 47.3                                  | 0.9                      | 0.7                           | 0.0                           |
| Experiment 3-3-0033 | <i>n</i> -Hexanoic acid 7 | 0.25                                                         | 0.16                           | 1000 mW                | 2.9          | 12.7              | 39.2                                  | 1.0                      | 1.3                           | 0.0                           |
| Experiment 3-3-0034 | <i>n</i> -Hexanoic acid 7 | 0.25                                                         | 0.31                           | 1000 mW                | 4.0          | 11.7              | 41.7                                  | 2.9                      | 3.4                           | 5.8                           |
| Experiment 3-3-0035 | <i>n</i> -Hexanoic acid 7 | 0.25                                                         | 0.63                           | 1000 mW                | 6.9          | 7.1               | 41.2                                  | 4.6                      | 7.3                           | 7.7                           |
| Experiment 3-3-0036 | <i>n</i> -Hexanoic acid 7 | 0.25                                                         | 1.25                           | 1000 mW                | 10.5         | 5.1               | 37.0                                  | 3.3                      | 7.8                           | 14.8                          |
| Experiment 3-3-0037 | <i>n</i> -Hexanoic acid 7 | 0.25                                                         | 2.5                            | 1000 mW                | 11.7         | 3.3               | 32.7                                  | 2.5                      | 8.7                           | 19.4                          |
| Experiment 3-3-0038 | <i>n</i> -Hexanoic acid 7 | 0.25                                                         | 5                              | 1000 mW                | 12.3         | 1.8               | 28.2                                  | 2.3                      | 8.7                           | 22.5                          |
| Experiment 3-3-0039 | <i>n</i> -Hexanoic acid 7 | 0.25                                                         | 10                             | 1000 mW                | 10.8         | 0.4               | 25.5                                  | 3.9                      | 8.0                           | 26.2                          |
| Experiment 3-3-0040 | <i>n</i> -Hexanoic acid 7 | 0.25                                                         | 20                             | 1000 mW                | 9.3          | 0.0               | 28.3                                  | 3.7                      | 9.7                           | 27.0                          |
| Experiment 3-3-0041 | <i>n</i> -Hexanoic acid 7 | 0.5                                                          | 0.04                           | 1000 mW                | 0.3          | 15.7              | 45.5                                  | 0.6                      | 0.5                           | 0.0                           |
| Experiment 3-3-0042 | <i>n</i> -Hexanoic acid 7 | 0.5                                                          | 0.08                           | 1000 mW                | 0.4          | 7.9               | 52.5                                  | 1.1                      | 1.1                           | 0.0                           |
| Experiment 3-3-0043 | <i>n</i> -Hexanoic acid 7 | 0.5                                                          | 0.16                           | 1000 mW                | 1.4          | 8.8               | 50.0                                  | 1.5                      | 1.9                           | 0.0                           |
| Experiment 3-3-0044 | <i>n</i> -Hexanoic acid 7 | 0.5                                                          | 0.31                           | 1000 mW                | 3.4          | 8.1               | 47.4                                  | 3.8                      | 4.3                           | 2.6                           |
| Experiment 3-3-0045 | <i>n</i> -Hexanoic acid 7 | 0.5                                                          | 0.63                           | 1000 mW                | 7.9          | 5.2               | 40.0                                  | 4.7                      | 6.6                           | 10.7                          |
| Experiment 3-3-0046 | <i>n</i> -Hexanoic acid 7 | 0.5                                                          | 1.25                           | 1000 mW                | 10.2         | 4.1               | 38.5                                  | 4.0                      | 8.8                           | 13.0                          |
| Experiment 3-3-0047 | <i>n</i> -Hexanoic acid 7 | 0.5                                                          | 2.5                            | 1000 mW                | 11.3         | 1.7               | 33.9                                  | 3.0                      | 9.7                           | 18.1                          |
| Experiment 3-3-0048 | <i>n</i> -Hexanoic acid 7 | 0.5                                                          | 5                              | 1000 mW                | 12.9         | 0.1               | 32.9                                  | 3.6                      | 10.0                          | 20.1                          |
| Experiment 3-3-0049 | <i>n</i> -Hexanoic acid 7 | 0.5                                                          | 10                             | 1000 mW                | 9.8          | 0.4               | 24.9                                  | 4.7                      | 7.3                           | 26.2                          |
| Experiment 3-3-0050 | <i>n</i> -Hexanoic acid 7 | 0.5                                                          | 20                             | 1000 mW                | 7.8          | 0.0               | 21.6                                  | 3.7                      | 8.0                           | 30.4                          |
| Experiment 3-3-0051 | <i>n</i> -Hexanoic acid 7 | 1                                                            | 0.04                           | 1000 mW                | 0.6          | 12.1              | 47.6                                  | 0.8                      | 0.6                           | 0.0                           |
| Experiment 3-3-0052 | <i>n</i> -Hexanoic acid 7 | 1                                                            | 0.08                           | 1000 mW                | 0.4          | 7.7               | 51.9                                  | 1.1                      | 1.2                           | 0.0                           |
| Experiment 3-3-0053 | <i>n</i> -Hexanoic acid 7 | 1                                                            | 0.16                           | 1000 mW                | 2.2          | 8.1               | 49.4                                  | 1.3                      | 1.7                           | 0.0                           |
| Experiment 3-3-0054 | <i>n</i> -Hexanoic acid 7 | 1                                                            | 0.31                           | 1000 mW                | 3.6          | 7.1               | 48.7                                  | 3.2                      | 4.2                           | 2.1                           |
| Experiment 3-3-0055 | <i>n</i> -Hexanoic acid 7 | 1                                                            | 0.63                           | 1000 mW                | 7.5          | 7.1               | 42.3                                  | 3.8                      | 7.2                           | 5.8                           |
| Experiment 3-3-0056 | <i>n</i> -Hexanoic acid 7 | 1                                                            | 1.25                           | 1000 mW                | 11.4         | 3.8               | 39.5                                  | 3.1                      | 9.0                           | 10.8                          |
| Experiment 3-3-0057 | <i>n</i> -Hexanoic acid 7 | 1                                                            | 2.5                            | 1000 mW                | 12.9         | 0.0               | 40.4                                  | 4.3                      | 12.7                          | 10.0                          |
| Experiment 3-3-0058 | <i>n</i> -Hexanoic acid 7 | 1                                                            | 5                              | 1000 mW                | 11.8         | 0.0               | 30.2                                  | 3.1                      | 9.1                           | 19.6                          |
| Experiment 3-3-0059 | <i>n</i> -Hexanoic acid 7 | 1                                                            | 10                             | 1000 mW                | 8.7          | 0.0               | 24.5                                  | 5.0                      | 8.5                           | 21.3                          |
| Experiment 3-3-0060 | <i>n</i> -Hexanoic acid 7 | 1                                                            | 20                             | 1000 mW                | 7.6          | 0.1               | 23.5                                  | 6.0                      | 8.0                           | 24.9                          |
| Experiment 3-3-0061 | <i>n</i> -Hexanoic acid 7 | 2                                                            | 0.04                           | 1000 mW                | 0.4          | 11.1              | 50.0                                  | 0.7                      | 0.4                           | 0.0                           |
| Experiment 3-3-0062 | <i>n</i> -Hexanoic acid 7 | 2                                                            | 0.08                           | 1000 mW                | 0.6          | 6.0               | 52.9                                  | 1.0                      | 0.9                           | 0.0                           |
| Experiment 3-3-0063 | <i>n</i> -Hexanoic acid 7 | 2                                                            | 0.16                           | 1000 mW                | 2.3          | 5.4               | 52.2                                  | 1.1                      | 1.6                           | 0.0                           |
| Experiment 3-3-0064 | <i>n</i> -Hexanoic acid 7 | 2                                                            | 0.31                           | 1000 mW                | 3.5          | 5.4               | 49.8                                  | 1.9                      | 3.6                           | 1.8                           |
| Experiment 3-3-0065 | <i>n</i> -Hexanoic acid 7 | 2                                                            | 0.63                           | 1000 mW                | 8.4          | 3.7               | 46.1                                  | 2.6                      | 7.1                           | 3.9                           |
| Experiment 3-3-0066 | <i>n</i> -Hexanoic acid 7 | 2                                                            | 1.25                           | 1000 mW                | 14.0         | 2.8               | 41.4                                  | 1.9                      | 9.5                           | 6.5                           |
| Experiment 3-3-0067 | <i>n</i> -Hexanoic acid 7 | 2                                                            | 2.5                            | 1000 mW                | 16.9         | 0.6               | 38.1                                  | 1.6                      | 10.7                          | 9.3                           |
| Experiment 3-3-0068 | <i>n</i> -Hexanoic acid 7 | 2                                                            | 5                              | 1000 mW                | 17.4         | 0.1               | 35.1                                  | 1.9                      | 10.5                          | 12.0                          |
| Experiment 3-3-0069 | <i>n</i> -Hexanoic acid 7 | 2                                                            | 10                             | 1000 mW                | 13.5         | 0.1               | 32.2                                  | 4.0                      | 9.8                           | 15.3                          |
| Experiment 3-3-0070 | <i>n</i> -Hexanoic acid 7 | 2                                                            | 20                             | 1000 mW                | 11.4         | 0.0               | 31.5                                  | 4.2                      | 9.8                           | 20.2                          |
| Experiment 3-3-0071 | <i>n</i> -Hexanoic acid 7 | 4                                                            | 0.04                           | 1000 mW                | 0.5          | 5.3               | 53.3                                  | 0.9                      | 0.4                           | 0.0                           |
| Experiment 3-3-0072 | <i>n</i> -Hexanoic acid 7 | 4                                                            | 0.08                           | 1000 mW                | 1.0          | 8.4               | 51.1                                  | 0.7                      | 0.7                           | 0.0                           |
| Experiment 3-3-0073 | <i>n</i> -Hexanoic acid 7 | 4                                                            | 0.16                           | 1000 mW                | 3.5          | 11.5              | 44.5                                  | 0.0                      | 0.8                           | 0.0                           |
| Experiment 3-3-0074 | <i>n</i> -Hexanoic acid 7 | 4                                                            | 0.31                           | 1000 mW                | 5.3          | 0.0               | 46.2                                  | 1.0                      | 3.1                           | 0.0                           |
| Experiment 3-3-0075 | <i>n</i> -Hexanoic acid 7 | 4                                                            | 0.63                           | 1000 mW                | 9.2          | 2.5               | 48.2                                  | 1.1                      | 6.4                           | 2.0                           |
| Experiment 3-3-0076 | <i>n</i> -Hexanoic acid 7 | 4                                                            | 1.25                           | 1000 mW                | 16.2         | 0.0               | 44.1                                  | 1.1                      | 11.5                          | 2.4                           |
| Experiment 3-3-0077 | <i>n</i> -Hexanoic acid 7 | 4                                                            | 2.5                            | 1000 mW                | 20.3         | 0.0               | 41.3                                  | 1.0                      | 12.9                          | 2.9                           |
| Experiment 3-3-0078 | <i>n</i> -Hexanoic acid 7 | 4                                                            | 5                              | 1000 mW                | 21.8         | 0.0               | 41.0                                  | 1.2                      | 12.9                          | 4.4                           |
| Experiment 3-3-0079 | <i>n</i> -Hexanoic acid 7 | 4                                                            | 10                             | 1000 mW                | 17.8         | 0.5               | 30.7                                  | 2.2                      | 7.3                           | 13.3                          |
| Experiment 3-3-0080 | <i>n</i> -Hexanoic acid 7 | 4                                                            | 20                             | 1000 mW                | 14.6         | 0.0               | 34.5                                  | 2.5                      | 9.6                           | 15.5                          |
| Experiment 3-3-0081 | <i>n</i> -Hexanoic acid 7 | 8                                                            | 0.04                           | 1000 mW                | 0.8          | 5.4               | 54.8                                  | 0.7                      | 0.3                           | 0.0                           |
| Experiment 3-3-0082 | <i>n</i> -Hexanoic acid 7 | 8                                                            | 0.08                           | 1000 mW                | 1.1          | 4.4               | 55.2                                  | 0.8                      | 0.5                           | 0.0                           |

|                     |                              |      |      |         |      |      |      |     |      |      |
|---------------------|------------------------------|------|------|---------|------|------|------|-----|------|------|
| Experiment 3-3-0083 | $\eta$ -Hexanoic acid 7      | 8    | 0.16 | 1000 mW | 3.2  | 9.9  | 49.8 | 0.5 | 0.9  | 0.0  |
| Experiment 3-3-0084 | $\eta$ -Hexanoic acid 7      | 8    | 0.31 | 1000 mW | 5.5  | 6.7  | 50.4 | 0.0 | 2.0  | 0.0  |
| Experiment 3-3-0085 | $\eta$ -Hexanoic acid 7      | 8    | 0.63 | 1000 mW | 9.9  | 0.0  | 50.0 | 0.7 | 7.5  | 0.0  |
| Experiment 3-3-0086 | $\eta$ -Hexanoic acid 7      | 8    | 1.25 | 1000 mW | 18.9 | 0.9  | 43.9 | 0.5 | 8.7  | 1.5  |
| Experiment 3-3-0087 | $\eta$ -Hexanoic acid 7      | 8    | 2.5  | 1000 mW | 22.3 | 2.3  | 38.0 | 0.5 | 8.1  | 3.2  |
| Experiment 3-3-0088 | $\eta$ -Hexanoic acid 7      | 8    | 5    | 1000 mW | 24.1 | 0.0  | 37.7 | 0.7 | 9.4  | 4.0  |
| Experiment 3-3-0089 | $\eta$ -Hexanoic acid 7      | 8    | 10   | 1000 mW | 19.8 | 0.6  | 31.9 | 2.0 | 6.8  | 9.8  |
| Experiment 3-3-0090 | $\eta$ -Hexanoic acid 7      | 8    | 20   | 1000 mW | 16.0 | 0.0  | 34.0 | 2.9 | 8.1  | 12.1 |
| Experiment 3-3-0091 | $\eta$ -Hexanoic acid 7      | 16   | 0.04 | 1000 mW | 2.2  | 8.7  | 39.9 | 0.0 | 0.0  | 0.0  |
| Experiment 3-3-0092 | $\eta$ -Hexanoic acid 7      | 16   | 0.08 | 1000 mW | 2.1  | 8.3  | 43.2 | 0.0 | 0.1  | 0.0  |
| Experiment 3-3-0093 | $\eta$ -Hexanoic acid 7      | 16   | 0.16 | 1000 mW | 2.9  | 8.2  | 45.0 | 0.0 | 0.2  | 0.0  |
| Experiment 3-3-0094 | $\eta$ -Hexanoic acid 7      | 16   | 0.31 | 1000 mW | 5.4  | 11.9 | 40.6 | 0.0 | 0.9  | 0.0  |
| Experiment 3-3-0095 | $\eta$ -Hexanoic acid 7      | 16   | 0.63 | 1000 mW | 11.5 | 0.8  | 50.3 | 0.0 | 3.9  | 0.0  |
| Experiment 3-3-0096 | $\eta$ -Hexanoic acid 7      | 16   | 1.25 | 1000 mW | 17.0 | 0.0  | 40.8 | 0.1 | 5.5  | 0.0  |
| Experiment 3-3-0097 | $\eta$ -Hexanoic acid 7      | 16   | 2.5  | 1000 mW | 16.5 | 0.8  | 37.3 | 0.0 | 4.1  | 0.0  |
| Experiment 3-3-0098 | $\eta$ -Hexanoic acid 7      | 16   | 5    | 1000 mW | 18.7 | 0.0  | 40.5 | 0.0 | 7.4  | 0.0  |
| Experiment 3-3-0099 | $\eta$ -Hexanoic acid 7      | 16   | 10   | 1000 mW | 16.3 | 0.2  | 32.4 | 1.5 | 5.4  | 5.0  |
| Experiment 3-3-0100 | $\eta$ -Hexanoic acid 7      | 16   | 20   | 1000 mW | 17.6 | 0.0  | 35.4 | 2.0 | 6.6  | 7.6  |
| Experiment 3-3-0301 | Cyclohexanecarboxylic acid 2 | 0.03 | 0.04 | 1000 mW | 8.7  | 4.0  | 50.2 | 0.0 | 0.9  | 0.0  |
| Experiment 3-3-0302 | Cyclohexanecarboxylic acid 2 | 0.03 | 0.08 | 1000 mW | 10.0 | 0.4  | 51.1 | 0.0 | 1.3  | 0.0  |
| Experiment 3-3-0303 | Cyclohexanecarboxylic acid 2 | 0.03 | 0.16 | 1000 mW | 14.0 | 1.6  | 47.7 | 0.0 | 2.5  | 0.0  |
| Experiment 3-3-0304 | Cyclohexanecarboxylic acid 2 | 0.03 | 0.31 | 1000 mW | 21.0 | 0.5  | 42.5 | 0.0 | 5.1  | 0.0  |
| Experiment 3-3-0305 | Cyclohexanecarboxylic acid 2 | 0.03 | 0.63 | 1000 mW | 39.2 | 0.0  | 32.7 | 0.0 | 9.6  | 0.0  |
| Experiment 3-3-0306 | Cyclohexanecarboxylic acid 2 | 0.03 | 1.25 | 1000 mW | 48.1 | 0.0  | 27.5 | 0.0 | 9.1  | 0.0  |
| Experiment 3-3-0307 | Cyclohexanecarboxylic acid 2 | 0.03 | 2.5  | 1000 mW | 48.1 | 0.1  | 25.8 | 0.0 | 6.7  | 3.0  |
| Experiment 3-3-0308 | Cyclohexanecarboxylic acid 2 | 0.03 | 5    | 1000 mW | 48.1 | 0.0  | 25.5 | 0.0 | 5.5  | 4.1  |
| Experiment 3-3-0309 | Cyclohexanecarboxylic acid 2 | 0.03 | 10   | 1000 mW | 46.2 | 0.0  | 26.6 | 0.0 | 5.2  | 5.5  |
| Experiment 3-3-0310 | Cyclohexanecarboxylic acid 2 | 0.03 | 20   | 1000 mW | 39.4 | 0.0  | 31.0 | 0.0 | 4.3  | 8.1  |
| Experiment 3-3-0311 | Cyclohexanecarboxylic acid 2 | 0.06 | 0.04 | 1000 mW | 9.3  | 2.0  | 51.0 | 0.0 | 0.9  | 0.0  |
| Experiment 3-3-0312 | Cyclohexanecarboxylic acid 2 | 0.06 | 0.08 | 1000 mW | 9.7  | 0.1  | 51.3 | 0.0 | 1.3  | 0.0  |
| Experiment 3-3-0313 | Cyclohexanecarboxylic acid 2 | 0.06 | 0.16 | 1000 mW | 13.4 | 1.2  | 48.0 | 0.0 | 2.1  | 0.0  |
| Experiment 3-3-0314 | Cyclohexanecarboxylic acid 2 | 0.06 | 0.31 | 1000 mW | 20.4 | 0.3  | 43.1 | 0.0 | 5.0  | 0.0  |
| Experiment 3-3-0315 | Cyclohexanecarboxylic acid 2 | 0.06 | 0.63 | 1000 mW | 38.6 | 0.0  | 31.7 | 0.0 | 9.0  | 0.0  |
| Experiment 3-3-0316 | Cyclohexanecarboxylic acid 2 | 0.06 | 1.25 | 1000 mW | 49.5 | 0.0  | 27.1 | 0.0 | 8.0  | 0.0  |
| Experiment 3-3-0317 | Cyclohexanecarboxylic acid 2 | 0.06 | 2.5  | 1000 mW | 48.8 | 0.0  | 26.7 | 0.0 | 7.0  | 2.4  |
| Experiment 3-3-0318 | Cyclohexanecarboxylic acid 2 | 0.06 | 5    | 1000 mW | 51.4 | 0.0  | 26.3 | 0.0 | 5.5  | 3.0  |
| Experiment 3-3-0319 | Cyclohexanecarboxylic acid 2 | 0.06 | 10   | 1000 mW | 43.6 | 0.0  | 23.5 | 0.0 | 4.7  | 8.4  |
| Experiment 3-3-0320 | Cyclohexanecarboxylic acid 2 | 0.06 | 20   | 1000 mW | 38.6 | 0.0  | 27.0 | 0.0 | 3.5  | 12.3 |
| Experiment 3-3-0321 | Cyclohexanecarboxylic acid 2 | 0.13 | 0.04 | 1000 mW | 9.4  | 3.7  | 49.8 | 0.0 | 0.8  | 0.0  |
| Experiment 3-3-0322 | Cyclohexanecarboxylic acid 2 | 0.13 | 0.08 | 1000 mW | 9.8  | 0.2  | 51.4 | 0.0 | 1.3  | 0.0  |
| Experiment 3-3-0323 | Cyclohexanecarboxylic acid 2 | 0.13 | 0.16 | 1000 mW | 13.4 | 0.2  | 49.9 | 0.0 | 2.3  | 0.0  |
| Experiment 3-3-0324 | Cyclohexanecarboxylic acid 2 | 0.13 | 0.31 | 1000 mW | 21.9 | 0.0  | 42.2 | 0.0 | 6.4  | 0.0  |
| Experiment 3-3-0325 | Cyclohexanecarboxylic acid 2 | 0.13 | 0.63 | 1000 mW | 38.7 | 0.1  | 31.7 | 0.0 | 10.4 | 0.0  |
| Experiment 3-3-0326 | Cyclohexanecarboxylic acid 2 | 0.13 | 1.25 | 1000 mW | 48.8 | 0.0  | 27.4 | 0.0 | 8.6  | 0.0  |
| Experiment 3-3-0327 | Cyclohexanecarboxylic acid 2 | 0.13 | 2.5  | 1000 mW | 49.5 | 0.0  | 26.9 | 0.0 | 8.5  | 1.4  |
| Experiment 3-3-0328 | Cyclohexanecarboxylic acid 2 | 0.13 | 5    | 1000 mW | 51.8 | 0.0  | 28.0 | 0.0 | 6.4  | 2.2  |
| Experiment 3-3-0329 | Cyclohexanecarboxylic acid 2 | 0.13 | 10   | 1000 mW | 46.6 | 0.0  | 28.6 | 0.0 | 6.5  | 5.8  |
| Experiment 3-3-0330 | Cyclohexanecarboxylic acid 2 | 0.13 | 20   | 1000 mW | 39.0 | 0.0  | 28.4 | 0.0 | 4.5  | 12.3 |
| Experiment 3-3-0331 | Cyclohexanecarboxylic acid 2 | 0.25 | 0.04 | 1000 mW | 9.9  | 1.5  | 50.6 | 0.0 | 0.8  | 0.0  |
| Experiment 3-3-0332 | Cyclohexanecarboxylic acid 2 | 0.25 | 0.08 | 1000 mW | 10.2 | 0.1  | 50.5 | 0.0 | 1.3  | 0.0  |
| Experiment 3-3-0333 | Cyclohexanecarboxylic acid 2 | 0.25 | 0.16 | 1000 mW | 14.0 | 0.0  | 49.7 | 0.0 | 2.3  | 0.0  |
| Experiment 3-3-0334 | Cyclohexanecarboxylic acid 2 | 0.25 | 0.31 | 1000 mW | 21.3 | 0.0  | 42.4 | 0.0 | 6.7  | 0.0  |
| Experiment 3-3-0335 | Cyclohexanecarboxylic acid 2 | 0.25 | 0.63 | 1000 mW | 38.4 | 0.0  | 30.7 | 0.0 | 9.2  | 0.0  |
| Experiment 3-3-0336 | Cyclohexanecarboxylic acid 2 | 0.25 | 1.25 | 1000 mW | 49.0 | 0.0  | 27.1 | 0.0 | 9.4  | 0.0  |
| Experiment 3-3-0337 | Cyclohexanecarboxylic acid 2 | 0.25 | 2.5  | 1000 mW | 47.2 | 0.0  | 26.4 | 0.0 | 8.4  | 2.5  |
| Experiment 3-3-0338 | Cyclohexanecarboxylic acid 2 | 0.25 | 5    | 1000 mW | 50.7 | 0.0  | 26.6 | 0.0 | 6.4  | 3.9  |
| Experiment 3-3-0339 | Cyclohexanecarboxylic acid 2 | 0.25 | 10   | 1000 mW | 44.0 | 0.0  | 26.7 | 0.0 | 5.9  | 9.1  |
| Experiment 3-3-0340 | Cyclohexanecarboxylic acid 2 | 0.25 | 20   | 1000 mW | 38.0 | 0.0  | 28.4 | 0.0 | 4.6  | 13.0 |
| Experiment 3-3-0341 | Cyclohexanecarboxylic acid 2 | 0.5  | 0.04 | 1000 mW | 9.3  | 2.4  | 50.1 | 0.0 | 0.8  | 0.0  |
| Experiment 3-3-0342 | Cyclohexanecarboxylic acid 2 | 0.5  | 0.08 | 1000 mW | 10.2 | 0.8  | 50.6 | 0.0 | 1.2  | 0.0  |
| Experiment 3-3-0343 | Cyclohexanecarboxylic acid 2 | 0.5  | 0.16 | 1000 mW | 13.6 | 0.4  | 48.9 | 0.0 | 2.3  | 0.0  |
| Experiment 3-3-0344 | Cyclohexanecarboxylic acid 2 | 0.5  | 0.31 | 1000 mW | 21.9 | 0.0  | 41.6 | 0.0 | 7.2  | 0.0  |
| Experiment 3-3-0345 | Cyclohexanecarboxylic acid 2 | 0.5  | 0.63 | 1000 mW | 37.5 | 0.0  | 30.2 | 0.0 | 9.3  | 0.0  |
| Experiment 3-3-0346 | Cyclohexanecarboxylic acid 2 | 0.5  | 1.25 | 1000 mW | 48.7 | 0.0  | 26.6 | 0.0 | 10.0 | 0.0  |
| Experiment 3-3-0347 | Cyclohexanecarboxylic acid 2 | 0.5  | 2.5  | 1000 mW | 50.3 | 0.0  | 27.1 | 0.0 | 8.7  | 0.8  |
| Experiment 3-3-0348 | Cyclohexanecarboxylic acid 2 | 0.5  | 5    | 1000 mW | 52.3 | 0.0  | 26.1 | 0.0 | 8.0  | 1.9  |
| Experiment 3-3-0349 | Cyclohexanecarboxylic acid 2 | 0.5  | 10   | 1000 mW | 45.4 | 0.0  | 27.0 | 0.0 | 6.3  | 7.4  |
| Experiment 3-3-0350 | Cyclohexanecarboxylic acid 2 | 0.5  | 20   | 1000 mW | 36.6 | 0.0  | 28.4 | 0.0 | 4.5  | 13.4 |
| Experiment 3-3-0351 | Cyclohexanecarboxylic acid 2 | 1    | 0.04 | 1000 mW | 9.3  | 3.5  | 49.2 | 0.0 | 0.7  | 0.0  |
| Experiment 3-3-0352 | Cyclohexanecarboxylic acid 2 | 1    | 0.08 | 1000 mW | 9.7  | 0.0  | 50.3 | 0.0 | 1.3  | 0.0  |
| Experiment 3-3-0353 | Cyclohexanecarboxylic acid 2 | 1    | 0.16 | 1000 mW | 13.7 | 0.0  | 49.8 | 0.0 | 2.3  | 0.0  |
| Experiment 3-3-0354 | Cyclohexanecarboxylic acid 2 | 1    | 0.31 | 1000 mW | 22.0 | 0.3  | 39.9 | 0.0 | 5.7  | 0.0  |
| Experiment 3-3-0355 | Cyclohexanecarboxylic acid 2 | 1    | 0.63 | 1000 mW | 39.2 | 0.0  | 31.1 | 0.0 | 10.2 | 0.0  |
| Experiment 3-3-0356 | Cyclohexanecarboxylic acid 2 | 1    | 1.25 | 1000 mW | 49.3 | 0.0  | 26.7 | 0.0 | 9.9  | 0.0  |
| Experiment 3-3-0357 | Cyclohexanecarboxylic acid 2 | 1    | 2.5  | 1000 mW | 54.2 | 0.0  | 25.9 | 0.0 | 8.3  | 0.0  |
| Experiment 3-3-0358 | Cyclohexanecarboxylic acid 2 | 1    | 5    | 1000 mW | 51.7 | 0.0  | 26.1 | 0.0 | 5.6  | 2.7  |
| Experiment 3-3-0359 | Cyclohexanecarboxylic acid 2 | 1    | 10   | 1000 mW | 47.1 | 0.0  | 27.4 | 0.0 | 6.3  | 5.3  |
| Experiment 3-3-0360 | Cyclohexanecarboxylic acid 2 | 1    | 20   | 1000 mW | 38.3 | 0.0  | 29.4 | 0.0 | 4.5  | 11.5 |
| Experiment 3-3-0361 | Cyclohexanecarboxylic acid 2 | 2    | 0.04 | 1000 mW | 8.7  | 2.7  | 51.3 | 0.0 | 0.8  | 0.0  |
| Experiment 3-3-0362 | Cyclohexanecarboxylic acid 2 | 2    | 0.08 | 1000 mW | 10.4 | 0.1  | 52.1 | 0.0 | 1.3  | 0.0  |
| Experiment 3-3-0363 | Cyclohexanecarboxylic acid 2 | 2    | 0.16 | 1000 mW | 13.3 | 0.4  | 49.0 | 0.0 | 2.2  | 0.0  |
| Experiment 3-3-0364 | Cyclohexanecarboxylic acid 2 | 2    | 0.31 | 1000 mW | 22.6 | 0.0  | 42.6 | 0.0 | 6.7  | 0.0  |
| Experiment 3-3-0365 | Cyclohexanecarboxylic acid 2 | 2    | 0.63 | 1000 mW | 39.7 | 0.1  | 30.7 | 0.0 | 9.7  | 0.0  |

|                     |                              |      |      |         |      |     |      |     |     |     |
|---------------------|------------------------------|------|------|---------|------|-----|------|-----|-----|-----|
| Experiment 3-3-0366 | Cyclohexanecarboxylic acid 2 | 2    | 1.25 | 1000 mW | 50.2 | 0.0 | 26.6 | 0.0 | 9.4 | 0.0 |
| Experiment 3-3-0367 | Cyclohexanecarboxylic acid 2 | 2    | 2.5  | 1000 mW | 53.0 | 0.0 | 26.8 | 0.0 | 7.0 | 0.9 |
| Experiment 3-3-0368 | Cyclohexanecarboxylic acid 2 | 2    | 5    | 1000 mW | 50.6 | 0.0 | 26.4 | 0.0 | 5.3 | 3.4 |
| Experiment 3-3-0369 | Cyclohexanecarboxylic acid 2 | 2    | 10   | 1000 mW | 48.9 | 0.0 | 29.8 | 0.0 | 6.2 | 2.6 |
| Experiment 3-3-0370 | Cyclohexanecarboxylic acid 2 | 2    | 20   | 1000 mW | 39.9 | 0.0 | 30.6 | 0.0 | 4.4 | 8.8 |
| Experiment 3-3-0371 | Cyclohexanecarboxylic acid 2 | 4    | 0.04 | 1000 mW | 8.6  | 0.0 | 54.5 | 0.0 | 1.0 | 0.0 |
| Experiment 3-3-0372 | Cyclohexanecarboxylic acid 2 | 4    | 0.08 | 1000 mW | 8.9  | 0.4 | 52.9 | 0.0 | 1.3 | 0.0 |
| Experiment 3-3-0373 | Cyclohexanecarboxylic acid 2 | 4    | 0.16 | 1000 mW | 13.0 | 0.9 | 50.7 | 0.0 | 2.1 | 0.0 |
| Experiment 3-3-0374 | Cyclohexanecarboxylic acid 2 | 4    | 0.31 | 1000 mW | 22.0 | 0.0 | 43.4 | 0.0 | 6.6 | 0.0 |
| Experiment 3-3-0375 | Cyclohexanecarboxylic acid 2 | 4    | 0.63 | 1000 mW | 39.5 | 0.0 | 31.1 | 0.0 | 9.5 | 0.0 |
| Experiment 3-3-0376 | Cyclohexanecarboxylic acid 2 | 4    | 1.25 | 1000 mW | 50.8 | 0.0 | 27.9 | 0.0 | 8.2 | 0.0 |
| Experiment 3-3-0377 | Cyclohexanecarboxylic acid 2 | 4    | 2.5  | 1000 mW | 50.6 | 0.0 | 27.4 | 0.0 | 6.7 | 0.8 |
| Experiment 3-3-0378 | Cyclohexanecarboxylic acid 2 | 4    | 5    | 1000 mW | 54.4 | 0.0 | 28.6 | 0.0 | 7.2 | 0.0 |
| Experiment 3-3-0379 | Cyclohexanecarboxylic acid 2 | 4    | 10   | 1000 mW | 48.9 | 0.0 | 32.0 | 0.0 | 5.9 | 1.5 |
| Experiment 3-3-0380 | Cyclohexanecarboxylic acid 2 | 4    | 20   | 1000 mW | 40.2 | 0.0 | 32.8 | 0.0 | 4.1 | 6.6 |
| Experiment 3-3-0381 | Cyclohexanecarboxylic acid 2 | 8    | 0.04 | 1000 mW | 7.1  | 2.7 | 54.3 | 0.0 | 0.7 | 0.0 |
| Experiment 3-3-0382 | Cyclohexanecarboxylic acid 2 | 8    | 0.08 | 1000 mW | 9.4  | 0.0 | 48.0 | 0.0 | 1.1 | 0.0 |
| Experiment 3-3-0383 | Cyclohexanecarboxylic acid 2 | 8    | 0.16 | 1000 mW | 12.3 | 0.1 | 53.6 | 0.0 | 2.0 | 0.0 |
| Experiment 3-3-0384 | Cyclohexanecarboxylic acid 2 | 8    | 0.31 | 1000 mW | 20.5 | 0.2 | 45.8 | 0.0 | 6.1 | 0.0 |
| Experiment 3-3-0385 | Cyclohexanecarboxylic acid 2 | 8    | 0.63 | 1000 mW | 39.8 | 0.0 | 32.8 | 0.0 | 8.6 | 0.0 |
| Experiment 3-3-0386 | Cyclohexanecarboxylic acid 2 | 8    | 1.25 | 1000 mW | 48.3 | 0.0 | 30.3 | 0.0 | 8.9 | 0.0 |
| Experiment 3-3-0387 | Cyclohexanecarboxylic acid 2 | 8    | 2.5  | 1000 mW | 50.5 | 0.0 | 31.3 | 0.0 | 7.0 | 0.0 |
| Experiment 3-3-0388 | Cyclohexanecarboxylic acid 2 | 8    | 5    | 1000 mW | 52.3 | 0.0 | 31.1 | 0.0 | 6.3 | 0.5 |
| Experiment 3-3-0389 | Cyclohexanecarboxylic acid 2 | 8    | 10   | 1000 mW | 45.9 | 0.0 | 35.2 | 0.0 | 4.6 | 1.1 |
| Experiment 3-3-0390 | Cyclohexanecarboxylic acid 2 | 8    | 20   | 1000 mW | 40.5 | 0.0 | 36.3 | 0.0 | 3.8 | 3.9 |
| Experiment 3-3-0391 | Cyclohexanecarboxylic acid 2 | 16   | 0.04 | 1000 mW | 2.3  | 5.9 | 58.8 | 0.0 | 0.0 | 0.2 |
| Experiment 3-3-0392 | Cyclohexanecarboxylic acid 2 | 16   | 0.08 | 1000 mW | 2.0  | 5.0 | 59.2 | 0.0 | 0.0 | 0.4 |
| Experiment 3-3-0393 | Cyclohexanecarboxylic acid 2 | 16   | 0.16 | 1000 mW | 3.8  | 4.9 | 58.9 | 0.0 | 0.3 | 0.5 |
| Experiment 3-3-0394 | Cyclohexanecarboxylic acid 2 | 16   | 0.31 | 1000 mW | 6.4  | 3.3 | 58.0 | 0.0 | 1.1 | 0.7 |
| Experiment 3-3-0395 | Cyclohexanecarboxylic acid 2 | 16   | 0.63 | 1000 mW | 23.2 | 0.0 | 50.6 | 0.0 | 5.9 | 0.0 |
| Experiment 3-3-0396 | Cyclohexanecarboxylic acid 2 | 16   | 1.25 | 1000 mW | 26.3 | 0.0 | 53.1 | 0.0 | 5.5 | 0.0 |
| Experiment 3-3-0397 | Cyclohexanecarboxylic acid 2 | 16   | 2.5  | 1000 mW | 28.3 | 0.0 | 55.0 | 0.0 | 4.4 | 0.0 |
| Experiment 3-3-0398 | Cyclohexanecarboxylic acid 2 | 16   | 5    | 1000 mW | 22.6 | 0.0 | 59.8 | 0.0 | 3.5 | 0.0 |
| Experiment 3-3-0399 | Cyclohexanecarboxylic acid 2 | 16   | 10   | 1000 mW | 30.2 | 0.2 | 51.6 | 0.0 | 3.2 | 0.1 |
| Experiment 3-3-0400 | Cyclohexanecarboxylic acid 2 | 16   | 20   | 1000 mW | 33.4 | 0.1 | 42.3 | 0.0 | 2.7 | 1.3 |
| Experiment 3-3-0601 | N-Boc-L-proline 9            | 0.03 | 0.04 | 1000 mW | 3.4  | 0.0 | 64.3 | 0.5 | 0.0 | 0.0 |
| Experiment 3-3-0602 | N-Boc-L-proline 9            | 0.03 | 0.08 | 1000 mW | 4.3  | 0.0 | 63.4 | 0.5 | 0.0 | 0.6 |
| Experiment 3-3-0603 | N-Boc-L-proline 9            | 0.03 | 0.16 | 1000 mW | 6.6  | 0.0 | 56.3 | 0.3 | 0.7 | 0.5 |
| Experiment 3-3-0604 | N-Boc-L-proline 9            | 0.03 | 0.31 | 1000 mW | 11.2 | 0.0 | 51.0 | 0.4 | 1.6 | 1.2 |
| Experiment 3-3-0605 | N-Boc-L-proline 9            | 0.03 | 0.63 | 1000 mW | 13.8 | 0.0 | 48.3 | 0.4 | 4.0 | 1.3 |
| Experiment 3-3-0606 | N-Boc-L-proline 9            | 0.03 | 1.25 | 1000 mW | 17.3 | 0.0 | 46.0 | 0.9 | 5.2 | 1.3 |
| Experiment 3-3-0607 | N-Boc-L-proline 9            | 0.03 | 2.5  | 1000 mW | 28.7 | 0.0 | 42.2 | 1.2 | 3.9 | 1.0 |
| Experiment 3-3-0608 | N-Boc-L-proline 9            | 0.03 | 5    | 1000 mW | 36.6 | 0.0 | 41.2 | 0.6 | 3.1 | 0.4 |
| Experiment 3-3-0609 | N-Boc-L-proline 9            | 0.03 | 10   | 1000 mW | 57.3 | 0.0 | 26.3 | 0.6 | 2.5 | 0.0 |
| Experiment 3-3-0610 | N-Boc-L-proline 9            | 0.03 | 20   | 1000 mW | 71.2 | 0.0 | 11.5 | 0.1 | 0.1 | 0.0 |
| Experiment 3-3-0611 | N-Boc-L-proline 9            | 0.06 | 0.04 | 1000 mW | 3.5  | 0.0 | 63.2 | 0.7 | 0.1 | 0.0 |
| Experiment 3-3-0612 | N-Boc-L-proline 9            | 0.06 | 0.08 | 1000 mW | 4.3  | 0.0 | 62.7 | 0.6 | 0.1 | 0.0 |
| Experiment 3-3-0613 | N-Boc-L-proline 9            | 0.06 | 0.16 | 1000 mW | 6.4  | 0.0 | 57.1 | 0.4 | 0.6 | 0.0 |
| Experiment 3-3-0614 | N-Boc-L-proline 9            | 0.06 | 0.31 | 1000 mW | 11.9 | 0.0 | 51.6 | 0.3 | 1.6 | 0.8 |
| Experiment 3-3-0615 | N-Boc-L-proline 9            | 0.06 | 0.63 | 1000 mW | 13.9 | 0.0 | 48.1 | 0.5 | 4.0 | 1.2 |
| Experiment 3-3-0616 | N-Boc-L-proline 9            | 0.06 | 1.25 | 1000 mW | 20.3 | 0.0 | 44.5 | 0.9 | 4.2 | 1.1 |
| Experiment 3-3-0617 | N-Boc-L-proline 9            | 0.06 | 2.5  | 1000 mW | 33.7 | 0.0 | 40.0 | 0.8 | 3.1 | 0.9 |
| Experiment 3-3-0618 | N-Boc-L-proline 9            | 0.06 | 5    | 1000 mW | 41.2 | 0.0 | 38.2 | 0.4 | 2.6 | 0.3 |
| Experiment 3-3-0619 | N-Boc-L-proline 9            | 0.06 | 10   | 1000 mW | 61.6 | 0.0 | 22.0 | 0.5 | 1.9 | 0.0 |
| Experiment 3-3-0620 | N-Boc-L-proline 9            | 0.06 | 20   | 1000 mW | 73.9 | 0.0 | 10.6 | 0.1 | 0.1 | 0.0 |
| Experiment 3-3-0621 | N-Boc-L-proline 9            | 0.13 | 0.04 | 1000 mW | 3.1  | 0.0 | 63.2 | 0.7 | 0.0 | 0.0 |
| Experiment 3-3-0622 | N-Boc-L-proline 9            | 0.13 | 0.08 | 1000 mW | 4.6  | 0.0 | 61.9 | 0.5 | 0.3 | 0.0 |
| Experiment 3-3-0623 | N-Boc-L-proline 9            | 0.13 | 0.16 | 1000 mW | 6.6  | 0.0 | 58.5 | 0.4 | 0.6 | 0.0 |
| Experiment 3-3-0624 | N-Boc-L-proline 9            | 0.13 | 0.31 | 1000 mW | 12.1 | 0.0 | 51.3 | 0.3 | 1.8 | 0.7 |
| Experiment 3-3-0625 | N-Boc-L-proline 9            | 0.13 | 0.63 | 1000 mW | 14.7 | 0.0 | 47.5 | 0.5 | 3.3 | 1.1 |
| Experiment 3-3-0626 | N-Boc-L-proline 9            | 0.13 | 1.25 | 1000 mW | 22.5 | 0.0 | 42.4 | 0.7 | 3.9 | 0.9 |
| Experiment 3-3-0627 | N-Boc-L-proline 9            | 0.13 | 2.5  | 1000 mW | 38.7 | 0.0 | 35.9 | 0.9 | 2.4 | 0.6 |
| Experiment 3-3-0628 | N-Boc-L-proline 9            | 0.13 | 5    | 1000 mW | 43.3 | 0.0 | 37.1 | 0.4 | 2.2 | 0.2 |
| Experiment 3-3-0629 | N-Boc-L-proline 9            | 0.13 | 10   | 1000 mW | 67.0 | 0.0 | 20.8 | 0.2 | 1.6 | 0.0 |
| Experiment 3-3-0630 | N-Boc-L-proline 9            | 0.13 | 20   | 1000 mW | 75.0 | 0.0 | 9.9  | 0.0 | 0.0 | 0.0 |
| Experiment 3-3-0631 | N-Boc-L-proline 9            | 0.25 | 0.04 | 1000 mW | 3.2  | 0.0 | 62.8 | 0.5 | 0.2 | 0.0 |
| Experiment 3-3-0632 | N-Boc-L-proline 9            | 0.25 | 0.08 | 1000 mW | 6.8  | 0.0 | 58.7 | 0.5 | 0.7 | 0.3 |
| Experiment 3-3-0633 | N-Boc-L-proline 9            | 0.25 | 0.16 | 1000 mW | 6.9  | 0.0 | 58.2 | 0.4 | 0.5 | 0.0 |
| Experiment 3-3-0634 | N-Boc-L-proline 9            | 0.25 | 0.31 | 1000 mW | 11.3 | 0.0 | 51.4 | 0.0 | 1.3 | 0.7 |
| Experiment 3-3-0635 | N-Boc-L-proline 9            | 0.25 | 0.63 | 1000 mW | 18.3 | 0.0 | 46.1 | 0.6 | 2.7 | 0.8 |
| Experiment 3-3-0636 | N-Boc-L-proline 9            | 0.25 | 1.25 | 1000 mW | 25.4 | 0.0 | 43.8 | 0.8 | 2.7 | 0.8 |
| Experiment 3-3-0637 | N-Boc-L-proline 9            | 0.25 | 2.5  | 1000 mW | 36.8 | 0.0 | 38.4 | 0.7 | 2.2 | 0.5 |
| Experiment 3-3-0638 | N-Boc-L-proline 9            | 0.25 | 5    | 1000 mW | 45.0 | 0.0 | 36.0 | 0.3 | 1.6 | 0.2 |
| Experiment 3-3-0639 | N-Boc-L-proline 9            | 0.25 | 10   | 1000 mW | 67.5 | 0.0 | 19.4 | 0.4 | 1.4 | 0.0 |
| Experiment 3-3-0640 | N-Boc-L-proline 9            | 0.25 | 20   | 1000 mW | 77.4 | 0.0 | 9.4  | 0.0 | 0.1 | 0.0 |
| Experiment 3-3-0641 | N-Boc-L-proline 9            | 0.5  | 0.04 | 1000 mW | 3.7  | 0.0 | 62.7 | 0.7 | 0.0 | 0.0 |
| Experiment 3-3-0642 | N-Boc-L-proline 9            | 0.5  | 0.08 | 1000 mW | 4.7  | 0.0 | 60.4 | 0.5 | 0.3 | 0.0 |
| Experiment 3-3-0643 | N-Boc-L-proline 9            | 0.5  | 0.16 | 1000 mW | 8.1  | 0.0 | 56.1 | 0.4 | 1.0 | 0.0 |
| Experiment 3-3-0644 | N-Boc-L-proline 9            | 0.5  | 0.31 | 1000 mW | 14.1 | 0.0 | 49.1 | 0.3 | 2.1 | 0.6 |
| Experiment 3-3-0645 | N-Boc-L-proline 9            | 0.5  | 0.63 | 1000 mW | 16.7 | 0.0 | 43.9 | 0.7 | 4.0 | 1.0 |
| Experiment 3-3-0646 | N-Boc-L-proline 9            | 0.5  | 1.25 | 1000 mW | 29.2 | 0.0 | 39.1 | 0.7 | 3.9 | 1.0 |
| Experiment 3-3-0647 | N-Boc-L-proline 9            | 0.5  | 2.5  | 1000 mW | 35.6 | 0.0 | 39.5 | 0.8 | 2.8 | 0.9 |
| Experiment 3-3-0648 | N-Boc-L-proline 9            | 0.5  | 5    | 1000 mW | 45.5 | 0.0 | 34.1 | 0.0 | 2.0 | 0.2 |

|                     |                   |     |      |         |      |     |      |     |      |     |
|---------------------|-------------------|-----|------|---------|------|-----|------|-----|------|-----|
| Experiment 3-3-0649 | N-Boc-L-proline 9 | 0.5 | 10   | 1000 mW | 68.0 | 0.0 | 20.2 | 0.0 | 1.0  | 0.0 |
| Experiment 3-3-0650 | N-Boc-L-proline 9 | 0.5 | 20   | 1000 mW | 73.9 | 0.0 | 10.6 | 0.0 | 0.2  | 0.0 |
| Experiment 3-3-0651 | N-Boc-L-proline 9 | 1   | 0.04 | 1000 mW | 3.5  | 0.0 | 63.7 | 0.7 | 0.0  | 0.0 |
| Experiment 3-3-0652 | N-Boc-L-proline 9 | 1   | 0.08 | 1000 mW | 4.9  | 0.0 | 61.4 | 0.6 | 0.2  | 0.0 |
| Experiment 3-3-0653 | N-Boc-L-proline 9 | 1   | 0.16 | 1000 mW | 7.8  | 0.0 | 57.9 | 0.3 | 0.7  | 0.0 |
| Experiment 3-3-0654 | N-Boc-L-proline 9 | 1   | 0.31 | 1000 mW | 13.7 | 0.0 | 48.8 | 0.4 | 2.3  | 0.8 |
| Experiment 3-3-0655 | N-Boc-L-proline 9 | 1   | 0.63 | 1000 mW | 19.1 | 0.0 | 42.2 | 0.7 | 4.3  | 1.0 |
| Experiment 3-3-0656 | N-Boc-L-proline 9 | 1   | 1.25 | 1000 mW | 26.0 | 0.0 | 41.6 | 1.2 | 4.2  | 1.1 |
| Experiment 3-3-0657 | N-Boc-L-proline 9 | 1   | 2.5  | 1000 mW | 34.9 | 0.0 | 40.3 | 0.7 | 3.0  | 1.0 |
| Experiment 3-3-0658 | N-Boc-L-proline 9 | 1   | 5    | 1000 mW | 46.3 | 0.0 | 35.1 | 0.4 | 2.4  | 0.3 |
| Experiment 3-3-0659 | N-Boc-L-proline 9 | 1   | 10   | 1000 mW | 61.8 | 0.0 | 24.9 | 0.2 | 2.2  | 0.0 |
| Experiment 3-3-0660 | N-Boc-L-proline 9 | 1   | 20   | 1000 mW | 71.1 | 0.0 | 10.3 | 0.2 | 0.2  | 0.0 |
| Experiment 3-3-0661 | N-Boc-L-proline 9 | 2   | 0.04 | 1000 mW | 3.4  | 0.0 | 63.8 | 0.6 | 0.0  | 0.0 |
| Experiment 3-3-0662 | N-Boc-L-proline 9 | 2   | 0.08 | 1000 mW | 5.1  | 0.0 | 59.6 | 0.5 | 0.0  | 0.5 |
| Experiment 3-3-0663 | N-Boc-L-proline 9 | 2   | 0.16 | 1000 mW | 7.9  | 0.0 | 57.9 | 0.4 | 0.6  | 0.7 |
| Experiment 3-3-0664 | N-Boc-L-proline 9 | 2   | 0.31 | 1000 mW | 8.7  | 0.0 | 36.6 | 0.0 | 1.3  | 0.0 |
| Experiment 3-3-0665 | N-Boc-L-proline 9 | 2   | 0.63 | 1000 mW | 18.1 | 0.0 | 44.8 | 0.6 | 4.3  | 1.0 |
| Experiment 3-3-0666 | N-Boc-L-proline 9 | 2   | 1.25 | 1000 mW | 25.4 | 0.0 | 40.0 | 1.2 | 5.5  | 0.9 |
| Experiment 3-3-0667 | N-Boc-L-proline 9 | 2   | 2.5  | 1000 mW | 29.6 | 0.0 | 44.3 | 0.9 | 3.6  | 1.1 |
| Experiment 3-3-0668 | N-Boc-L-proline 9 | 2   | 5    | 1000 mW | 39.3 | 0.0 | 37.6 | 0.7 | 3.8  | 0.4 |
| Experiment 3-3-0669 | N-Boc-L-proline 9 | 2   | 10   | 1000 mW | 50.2 | 0.0 | 32.9 | 0.4 | 2.7  | 0.0 |
| Experiment 3-3-0670 | N-Boc-L-proline 9 | 2   | 20   | 1000 mW | 70.4 | 0.0 | 11.3 | 0.0 | 0.0  | 0.0 |
| Experiment 3-3-0671 | N-Boc-L-proline 9 | 4   | 0.04 | 1000 mW | 4.4  | 0.0 | 63.9 | 0.6 | 0.0  | 0.7 |
| Experiment 3-3-0672 | N-Boc-L-proline 9 | 4   | 0.08 | 1000 mW | 6.0  | 0.0 | 60.5 | 0.5 | 0.0  | 1.2 |
| Experiment 3-3-0673 | N-Boc-L-proline 9 | 4   | 0.16 | 1000 mW | 8.5  | 0.0 | 59.0 | 0.3 | 0.5  | 1.1 |
| Experiment 3-3-0674 | N-Boc-L-proline 9 | 4   | 0.31 | 1000 mW | 12.2 | 0.0 | 52.2 | 0.3 | 1.9  | 1.2 |
| Experiment 3-3-0675 | N-Boc-L-proline 9 | 4   | 0.63 | 1000 mW | 15.0 | 0.0 | 46.6 | 0.6 | 5.1  | 1.2 |
| Experiment 3-3-0676 | N-Boc-L-proline 9 | 4   | 1.25 | 1000 mW | 20.4 | 0.0 | 42.7 | 1.4 | 6.9  | 1.0 |
| Experiment 3-3-0677 | N-Boc-L-proline 9 | 4   | 2.5  | 1000 mW | 28.4 | 0.0 | 42.6 | 1.2 | 5.4  | 0.8 |
| Experiment 3-3-0678 | N-Boc-L-proline 9 | 4   | 5    | 1000 mW | 32.8 | 0.0 | 43.6 | 1.0 | 4.3  | 0.4 |
| Experiment 3-3-0679 | N-Boc-L-proline 9 | 4   | 10   | 1000 mW | 42.4 | 0.0 | 36.7 | 0.7 | 3.3  | 0.0 |
| Experiment 3-3-0680 | N-Boc-L-proline 9 | 4   | 20   | 1000 mW | 51.4 | 0.0 | 24.4 | 2.0 | 1.5  | 0.0 |
| Experiment 3-3-0681 | N-Boc-L-proline 9 | 8   | 0.04 | 1000 mW | 5.4  | 0.0 | 65.4 | 0.5 | 0.0  | 1.2 |
| Experiment 3-3-0682 | N-Boc-L-proline 9 | 8   | 0.08 | 1000 mW | 7.3  | 0.0 | 62.3 | 0.5 | 0.3  | 1.4 |
| Experiment 3-3-0683 | N-Boc-L-proline 9 | 8   | 0.16 | 1000 mW | 9.6  | 0.0 | 58.9 | 0.4 | 0.7  | 1.4 |
| Experiment 3-3-0684 | N-Boc-L-proline 9 | 8   | 0.31 | 1000 mW | 10.9 | 0.0 | 55.8 | 0.3 | 2.2  | 1.4 |
| Experiment 3-3-0685 | N-Boc-L-proline 9 | 8   | 0.63 | 1000 mW | 13.1 | 0.0 | 39.2 | 0.0 | 4.6  | 0.9 |
| Experiment 3-3-0686 | N-Boc-L-proline 9 | 8   | 1.25 | 1000 mW | 20.1 | 0.0 | 38.3 | 1.1 | 7.7  | 0.7 |
| Experiment 3-3-0687 | N-Boc-L-proline 9 | 8   | 2.5  | 1000 mW | 24.2 | 0.0 | 47.2 | 0.9 | 5.9  | 1.0 |
| Experiment 3-3-0688 | N-Boc-L-proline 9 | 8   | 5    | 1000 mW | 25.7 | 0.0 | 40.5 | 0.8 | 4.9  | 0.1 |
| Experiment 3-3-0689 | N-Boc-L-proline 9 | 8   | 10   | 1000 mW | 33.3 | 0.0 | 39.5 | 1.6 | 4.7  | 0.1 |
| Experiment 3-3-0690 | N-Boc-L-proline 9 | 8   | 20   | 1000 mW | 29.5 | 0.0 | 25.9 | 2.6 | 2.3  | 0.0 |
| Experiment 3-3-0691 | N-Boc-L-proline 9 | 16  | 0.04 | 1000 mW | 3.8  | 0.0 | 60.6 | 0.3 | 0.1  | 1.1 |
| Experiment 3-3-0692 | N-Boc-L-proline 9 | 16  | 0.08 | 1000 mW | 3.7  | 0.0 | 52.7 | 0.3 | 0.2  | 0.9 |
| Experiment 3-3-0693 | N-Boc-L-proline 9 | 16  | 0.16 | 1000 mW | 4.6  | 0.0 | 54.3 | 0.2 | 0.6  | 0.9 |
| Experiment 3-3-0694 | N-Boc-L-proline 9 | 16  | 0.31 | 1000 mW | 7.2  | 0.0 | 51.1 | 0.4 | 1.9  | 0.8 |
| Experiment 3-3-0695 | N-Boc-L-proline 9 | 16  | 0.63 | 1000 mW | 12.4 | 0.0 | 49.5 | 0.7 | 6.9  | 0.9 |
| Experiment 3-3-0696 | N-Boc-L-proline 9 | 16  | 1.25 | 1000 mW | 18.2 | 0.0 | 45.6 | 0.3 | 10.6 | 0.8 |
| Experiment 3-3-0697 | N-Boc-L-proline 9 | 16  | 2.5  | 1000 mW | 17.6 | 0.0 | 47.4 | 0.3 | 8.6  | 0.5 |
| Experiment 3-3-0698 | N-Boc-L-proline 9 | 16  | 5    | 1000 mW | 20.2 | 0.0 | 47.0 | 0.5 | 7.4  | 0.3 |
| Experiment 3-3-0699 | N-Boc-L-proline 9 | 16  | 10   | 1000 mW | 23.6 | 0.0 | 42.0 | 1.1 | 4.5  | 0.1 |
| Experiment 3-3-0700 | N-Boc-L-proline 9 | 16  | 20   | 1000 mW | 17.4 | 0.0 | 41.9 | 3.3 | 4.1  | 0.0 |
